# Supplementary material
Source: PubMed Central journal article supplement (PMC4926978)
Supplement: ASN.2015050542_ASN2015050542SupplementaryData.pdf [file ASN.2015050542_ASN2015050542SupplementaryData.pdf]

# Contents

|                                                                                                     |              |
|-----------------------------------------------------------------------------------------------------|--------------|
| <b>APPENDIX 1: Figures and tables .....</b>                                                         | <b>3-62</b>  |
| <b>Forest plots: CKD stage 1-5 prevalence .....</b>                                                 | <b>3-17</b>  |
| ○ <b>Figure 1: CKD stage 1-5, ages 20-74 years, separate for IDMS and non IDMS studies.....</b>     | <b>3-5</b>   |
| a: overall population                                                                               |              |
| b: per diabetic status                                                                              |              |
| c: per hypertensive status                                                                          |              |
| d: per obesity status                                                                               |              |
| ○ <b>Figure 2.1: CKD stage 1-5 in ages 20-44 years, separate for IDMS and non IDMS studies.....</b> | <b>6-8</b>   |
| a: overall population                                                                               |              |
| b: per diabetic status                                                                              |              |
| c: per hypertensive status                                                                          |              |
| d: per obesity status                                                                               |              |
| ○ <b>Figure 2.2: CKD stage 1-5 in ages 45-64 years, separate for IDMS and non IDMS studies.....</b> | <b>9-11</b>  |
| a: overall population                                                                               |              |
| b: per diabetic status                                                                              |              |
| c: per hypertensive status                                                                          |              |
| d: per obesity status                                                                               |              |
| ○ <b>Figure 2.3:CKD stage 1-5 in ages 65-74 years, separate for IDMS and non IDMS studies.....</b>  | <b>12-15</b> |
| a: overall population                                                                               |              |
| b: per diabetic status                                                                              |              |
| c: per hypertensive status                                                                          |              |
| d: per obesity status                                                                               |              |
| ○ <b>Figure 2.4:CKD stage 1-5 in ages 75-84 years, separate for IDMS and non IDMS studies.....</b>  | <b>16-19</b> |
| a: overall population                                                                               |              |
| b: per diabetic status                                                                              |              |
| c: per hypertensive status                                                                          |              |
| d: per obesity status                                                                               |              |
| <b>Forest plots: CKD stage 3-5 prevalence .....</b>                                                 | <b>20-40</b> |
| ○ <b>Figure 3: CKD stage 3-5, ages 20-74 years, separate for IDMS and non IDMS studies.....</b>     | <b>21-23</b> |
| a: overall population                                                                               |              |
| b: per diabetic status                                                                              |              |
| c: per hypertensive status                                                                          |              |
| d: per obesity status                                                                               |              |
| ○ <b>Figure 4.1: CKD stage 3-5 in ages 20-44 years, separate for IDMS and non IDMS studies.....</b> | <b>24-26</b> |
| a: overall population                                                                               |              |
| b: per diabetic status                                                                              |              |
| c: per hypertensive status                                                                          |              |
| d: per obesity status                                                                               |              |
| ○ <b>Figure 4.2: CKD stage 3-5 in ages 45-64 years, separate for IDMS and non IDMS studies.....</b> | <b>27-32</b> |
| a: overall population                                                                               |              |
| b: per diabetic status                                                                              |              |
| c: per hypertensive status                                                                          |              |
| d: per obesity status                                                                               |              |
| ○ <b>Figure 4.3: CKD stage 3-5 in ages 65-74 years, separate for IDMS and non IDMS studies.....</b> | <b>33-38</b> |
| a: overall population                                                                               |              |
| b: per diabetic status                                                                              |              |
| c: per hypertensive status                                                                          |              |
| d: per obesity status                                                                               |              |

- **Figure 4.4: CKD stage 3-5 in ages 75-84 years, separate for IDMS and non IDMS studies.....39-44**
  - a: overall population
  - b: per diabetic status
  - c: per hypertensive status
  - d: per obesity status

**Tables: .....45-49**

**Table 1.1: Study population characteristics and laboratory methods for participants aged >=20 years.....46**

**Table 1.2: Study population characteristics and laboratory methods for participants aged >= 65 years.....47-48**

**Table 2: Adjusted and unadjusted prevalence of CKD in studies including participants aged >= 20 years.....49**

**Tables with subgroup information ..... 50**

- **Table 3: Diabetic subjects.....50-52**
  - Separate per age group
- **Table 4: Hypertensive subjects.....53-55**
  - Separate per age group
- **Table 5: Obese subjects.....56-58**
  - Separate per age group
- **Table 6: Non-diabetic subjects.....59-61**
  - Separate per age group
- **Table 7: Non-hypertensive subjects.....62-64**
  - Separate per age group
- **Table 8: Non-obese subjects.....65-67**
  - Separate per age group

**APPENDIX 2: Methods on study selection ..... 68**

**Search strategy ..... 68**

**In and exclusion criteria ..... 68**

**Procedure ..... 68**

**Table 1: Collected data per study.....69-60**

**Table 2: Answers to questions on national health care system characteristics .....71-72**

## Appendix 1: Figures and tables

### forest plots: CKD stage 1-5 prevalence

Figure 1a: CKD stage 1-5 prevalence (95%CI) in the adult population, IDMS studies, overall population.

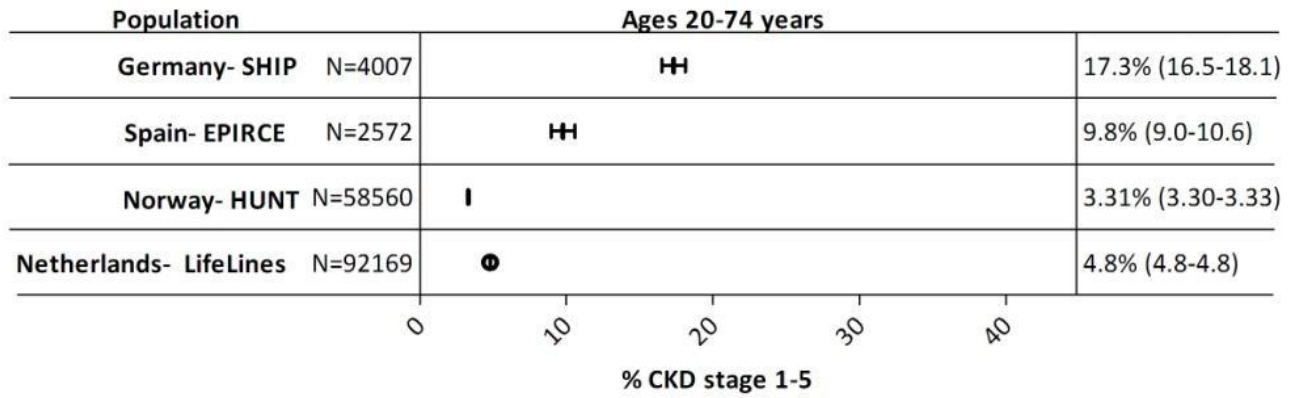

Figure 1b: Prevalence of CKD stage 1-5 in age group 20-74 years, IDMS studies, by diabetic status.

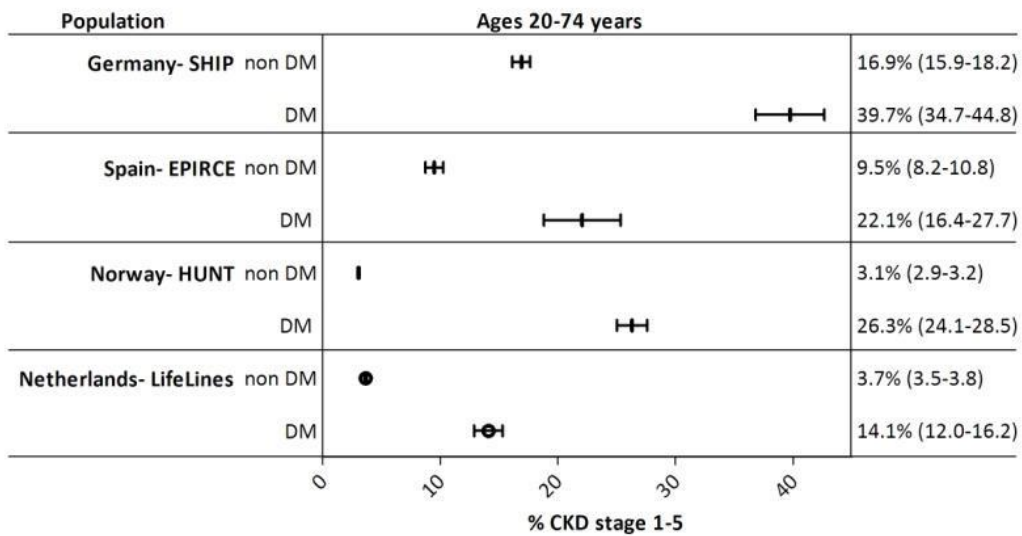

The adult population was defined as subjects aged 20 to 74 years. Adjusted prevalence was age and sex adjusted to the EU27 population of 2005. DM = diabetes mellitus.

Figure 1c: Prevalence of CKD stage 1-5 in age group 20-74 years, IDMS studies, by hypertensive status.

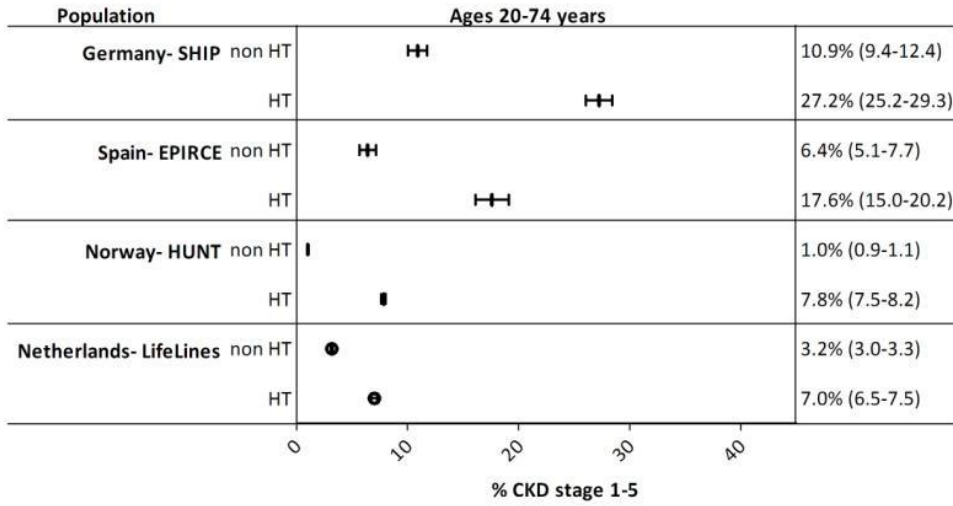

Figure 1d: Prevalence of CKD stage 1-5 in age group 20-74 years, non-IDMS studies, by obesity status.

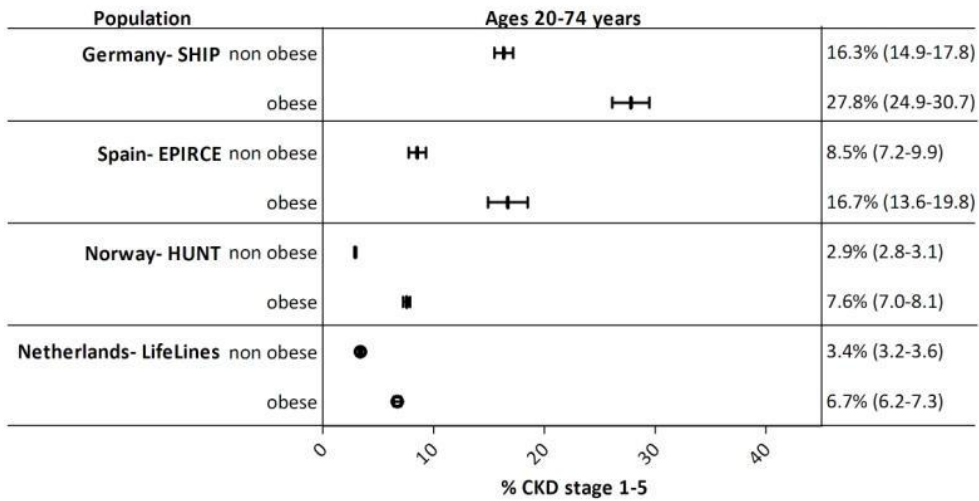

The adult population was defined as subjects aged 20 to 74 years. HT= hypertension.

Figure 1a: CKD stage 1-5 prevalence (95%CI) in the adult population, non-IDMS studies, overall population.

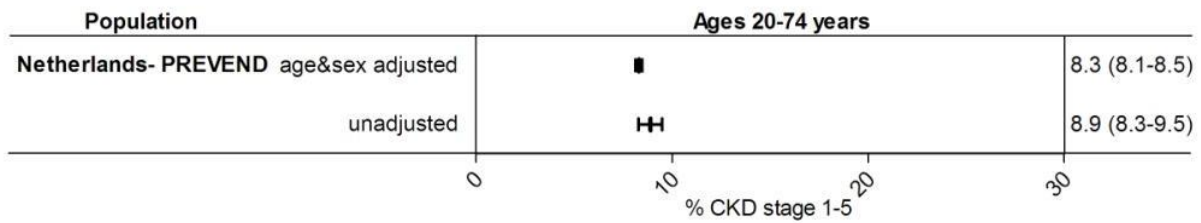

Figure 1b: Prevalence of CKD stage 1-5 in age group 20-74 years, non-IDMS studies, by diabetic status.

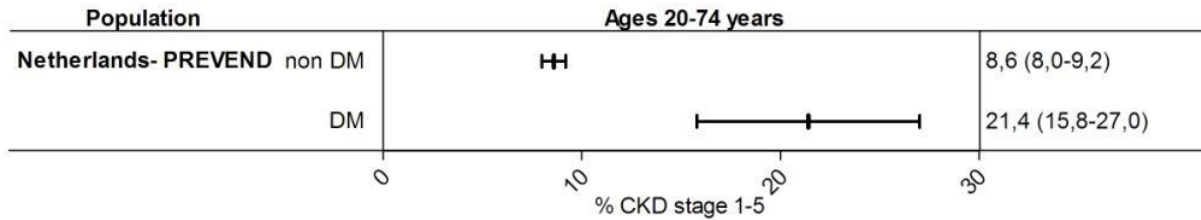

Figure 1c: Prevalence of CKD stage 1-5 in age group 20-74 years, non-IDMS studies, by hypertensive status.

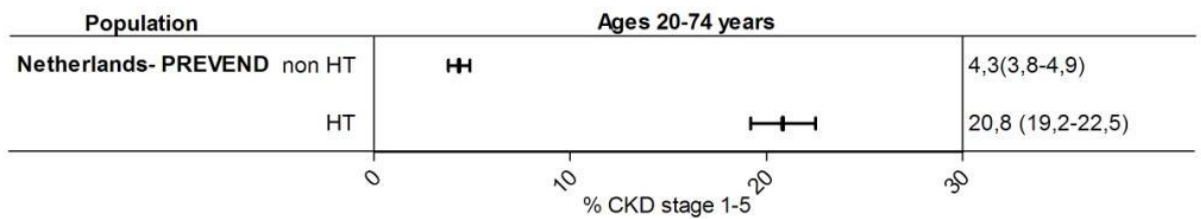

Figure 1d: Prevalence of CKD stage 1-5 in age group 20-74 years, non-IDMS studies, by obesity status.

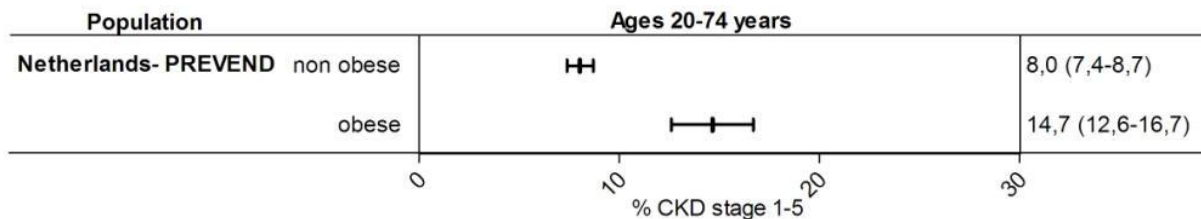

The adult population was defined as subjects aged 20 to 74 years. Adjusted prevalence was age and sex adjusted to the EU27 population of 2005. DM = diabetes mellitus, HT= hypertension. In the PREVEND study all known diabetics were excluded, therefore the prevalence in diabetics is likely an underrepresentation of the true CKD prevalence in diabetics. The PREVEND study used an enzymatic assay to determine serum creatinine.

Figure 2.1: CKD stage 1-5 prevalence (95%CI) in age group 20-44 years, in studies using IDMS traceable creatinine.

a: overall population

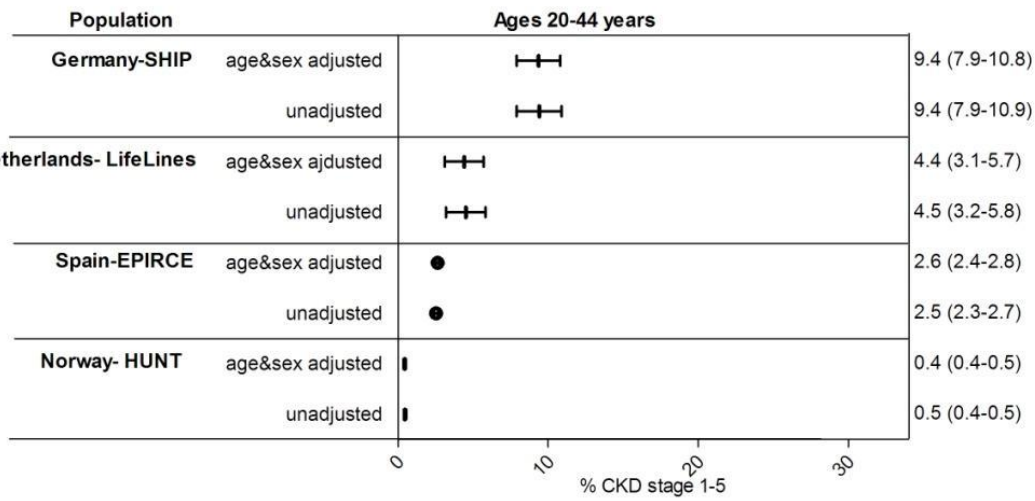

b: by diabetic status

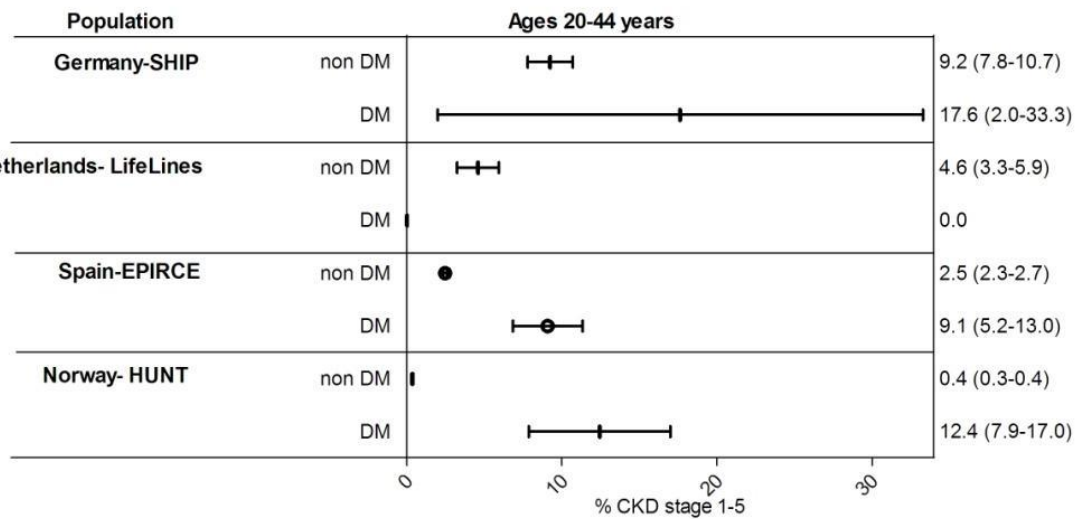

Adjusted prevalence was age and sex adjusted to the EU27 population of 2005. ◯ studies using enzymatic method, | studies using Jaffe method. DM = diabetes mellitus .

Figure 2.1: CKD stage 1-5 prevalence (95%CI) in age group 20-44 years, in studies using IDMS traceable creatinine.

c: by hypertensive status

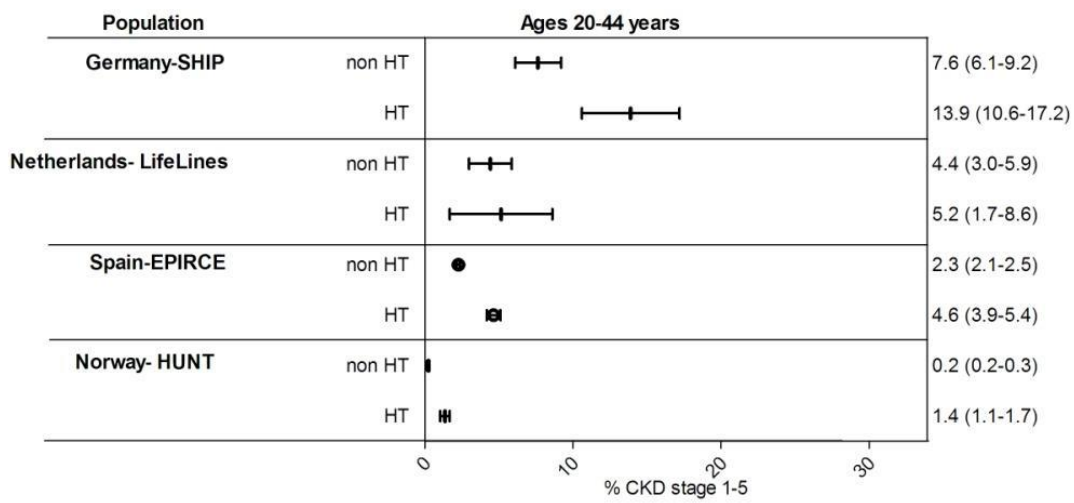

d: by obesity status

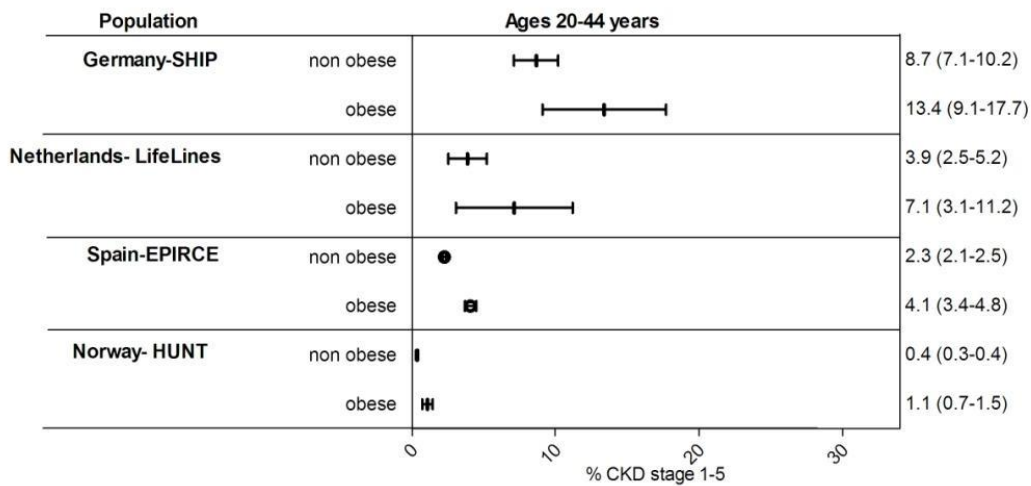

● studies using enzymatic method, | studies using Jaffe method. HT= hypertension.

Figure 2.1: CKD stage 1-5 prevalence (95%CI) in age group 20-44 years, in studies using non-IDMS traceable creatinine.

a: overall population

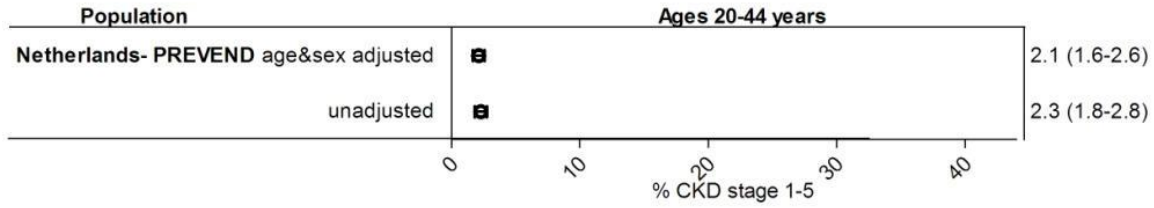

b: by diabetic status

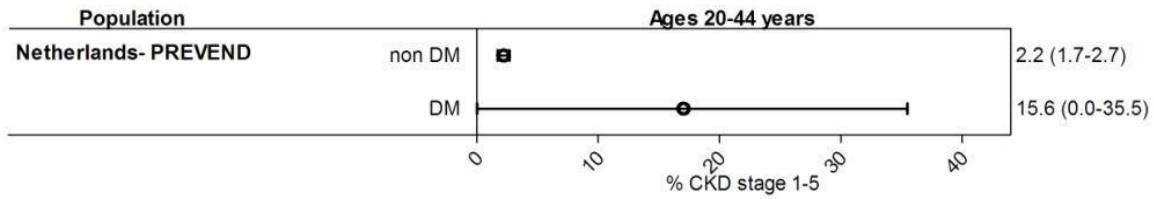

c: by hypertensive status

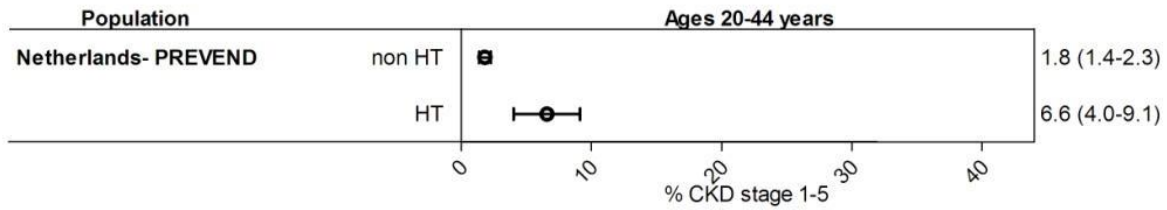

d: by obesity status

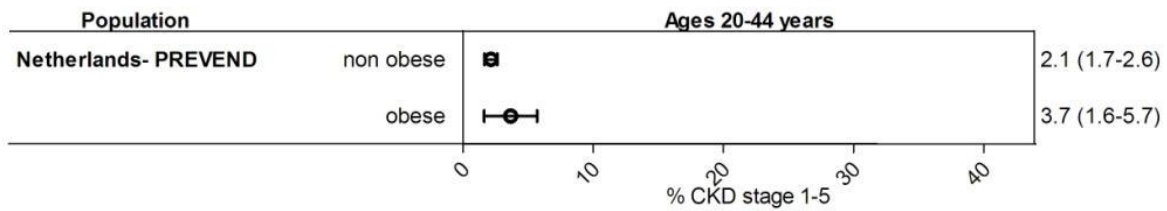

Adjusted prevalence was age and sex adjusted to the EU27 population of 2005.  $\ominus$  studies using enzymatic method. DM = diabetes mellitus, HT= hypertension. In the PREVEND study all known diabetics were excluded, therefore the prevalence in diabetics is likely an underrepresentation of the true CKD prevalence in diabetics. The PREVEND study used an enzymatic assay to determine serum creatinine.



Figure 2.2: CKD stage 1-5 prevalence (95%CI) in age group 45-64 years, in studies using IDMS traceable creatinine.

a: overall population

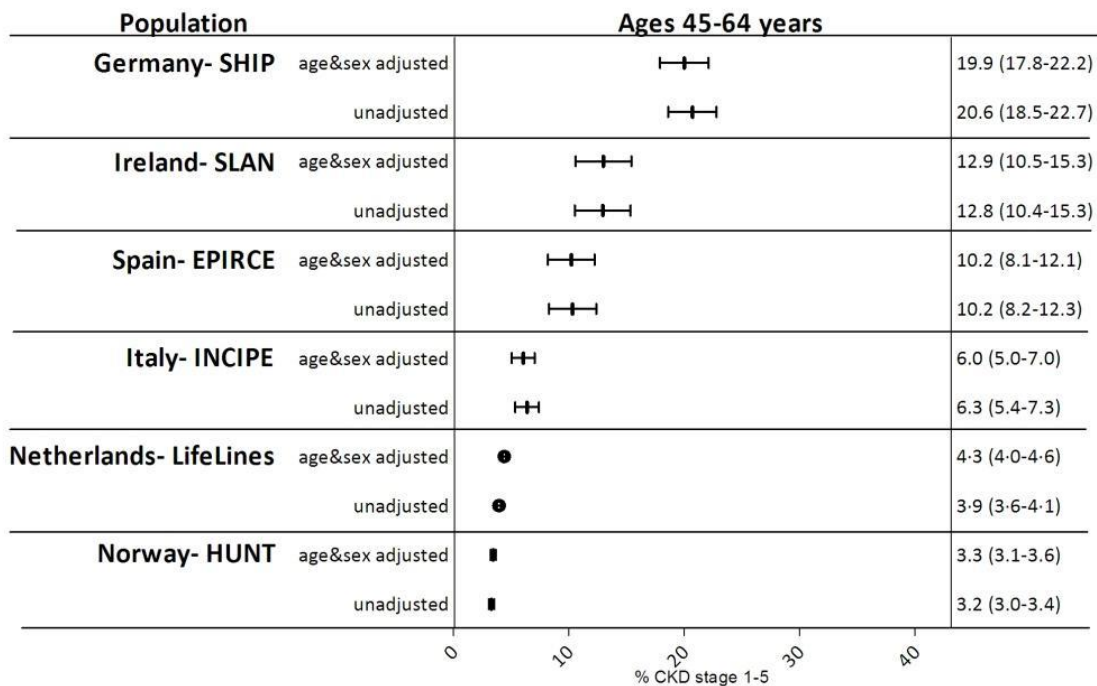

b: by diabetic status

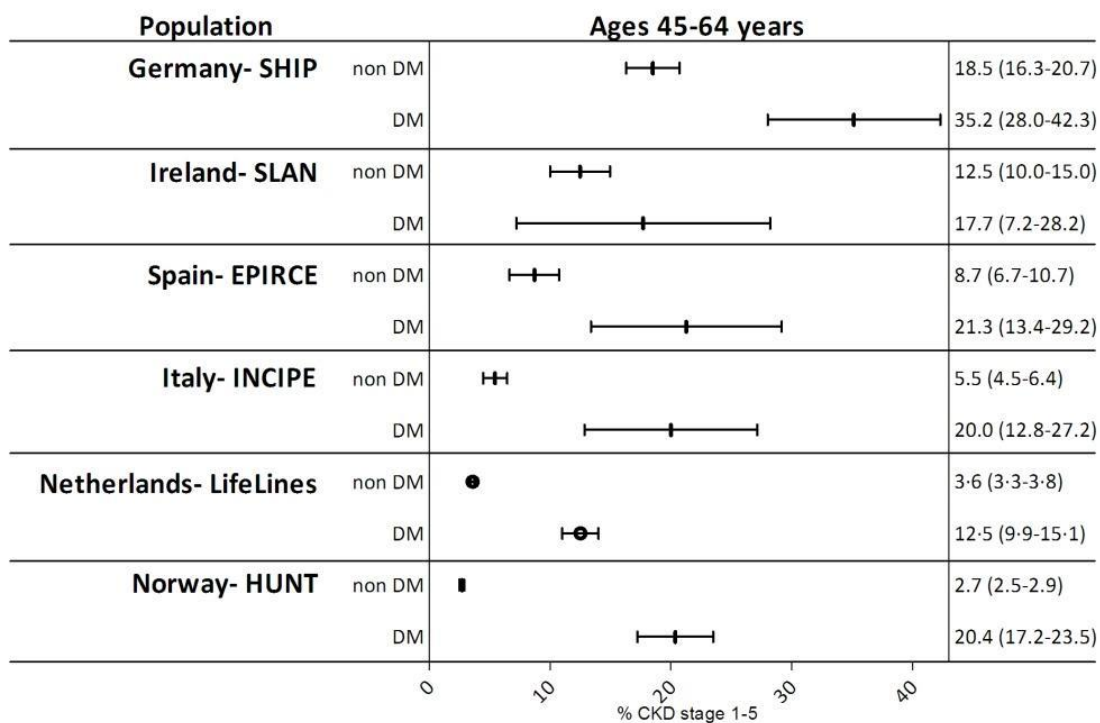

Adjusted prevalence was age and sex adjusted to the EU27 population of 2005. ● studies using enzymatic method, | studies using Jaffe method. DM = diabetes mellitus.

Figure 2.2: CKD stage 1-5 prevalence (95%CI) in age group 45-64 years, in studies using IDMS traceable creatinine.

c: by hypertensive status

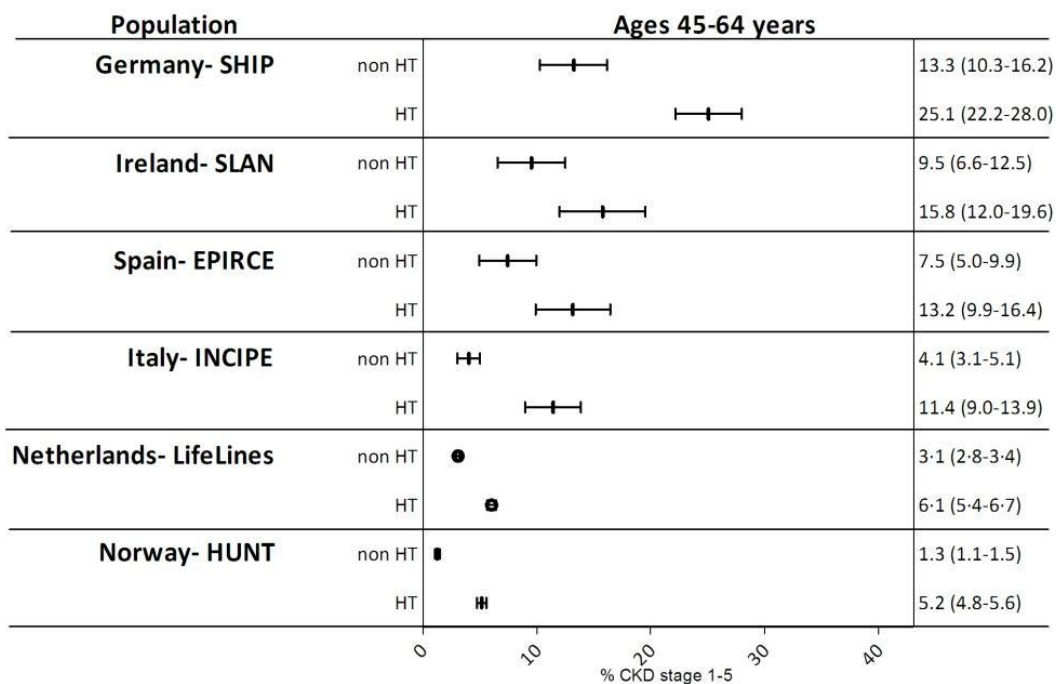

d: by obesity status

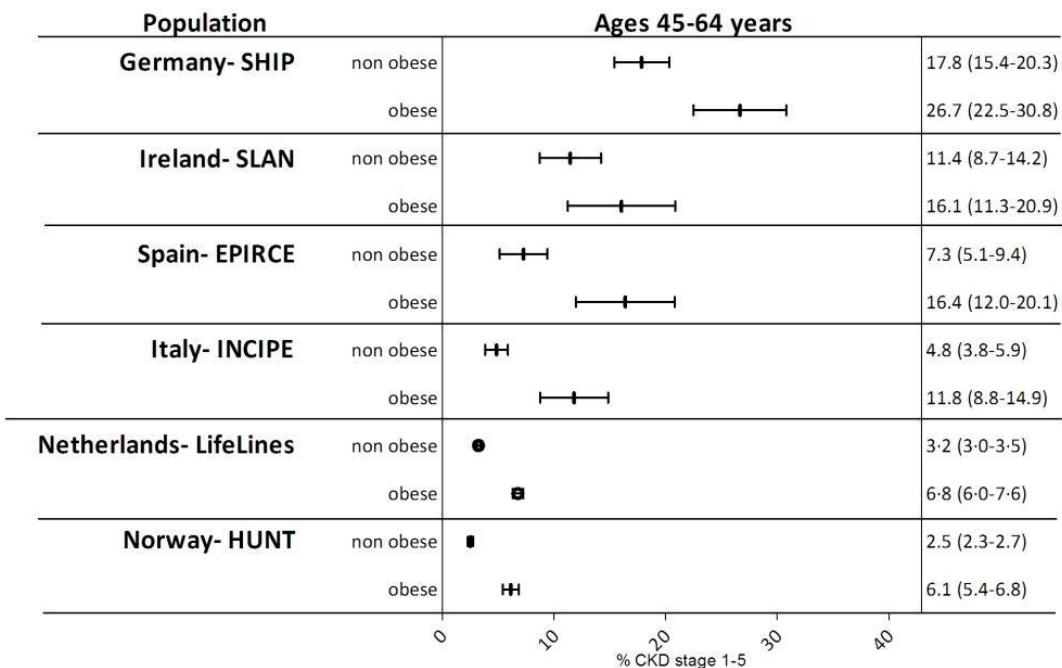

● studies using enzymatic method, | studies using Jaffe method. HT= hypertension.

Figure 2.2: CKD stage 1-5 prevalence (95%CI) in age group 45-64 years, in studies using non-IDMS traceable creatinine.

a: overall population

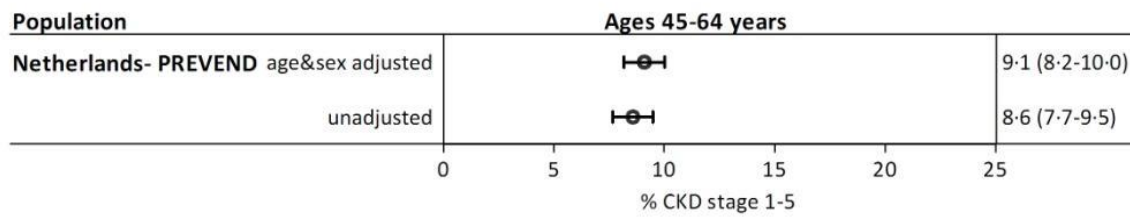

b: by diabetic status

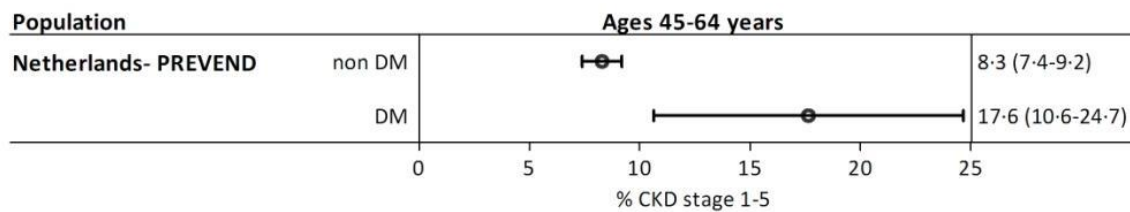

c: by hypertensive status

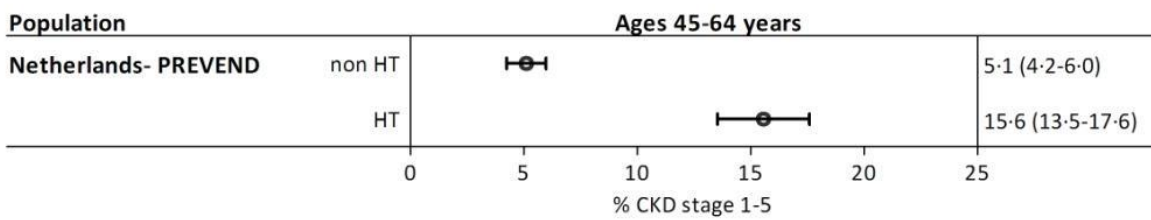

d: by obesity status

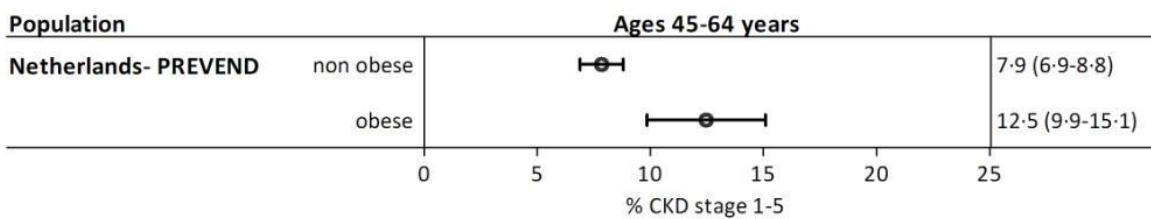

Adjusted prevalence was age and sex adjusted to the EU27 population of 2005. DM = diabetes mellitus, HT= hypertension. In the PREVEND study all known diabetics were excluded, therefore the prevalence in diabetics is likely an underrepresentation of the true CKD prevalence in diabetics. The PREVEND study used an enzymatic assay to determine serum creatinine.

Figure 2.3: CKD stage 1-5 prevalence (95%CI) in age group 65-74 years, in studies using IDMS traceable creatinine.  
a: overall population

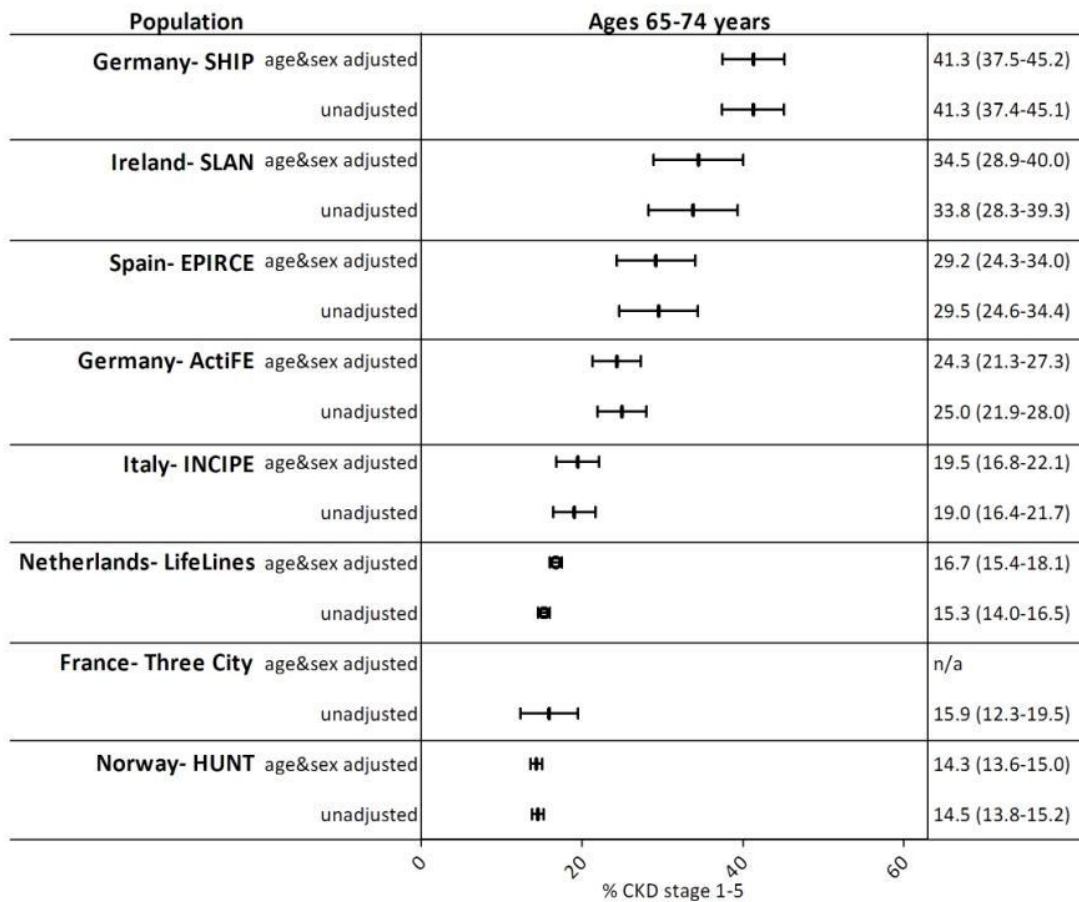

Adjusted prevalence was age and sex adjusted to the EU27 population of 2005. ◼ studies using enzymatic method, | studies using Jaffe method. Three City data from subgroup population with albuminuria data measured 4 years after study inclusion.

Figure 2.3: CKD stage 1-5 prevalence (95%CI) in age group 65-74 years, in studies using IDMS traceable creatinine.  
b: by diabetic status

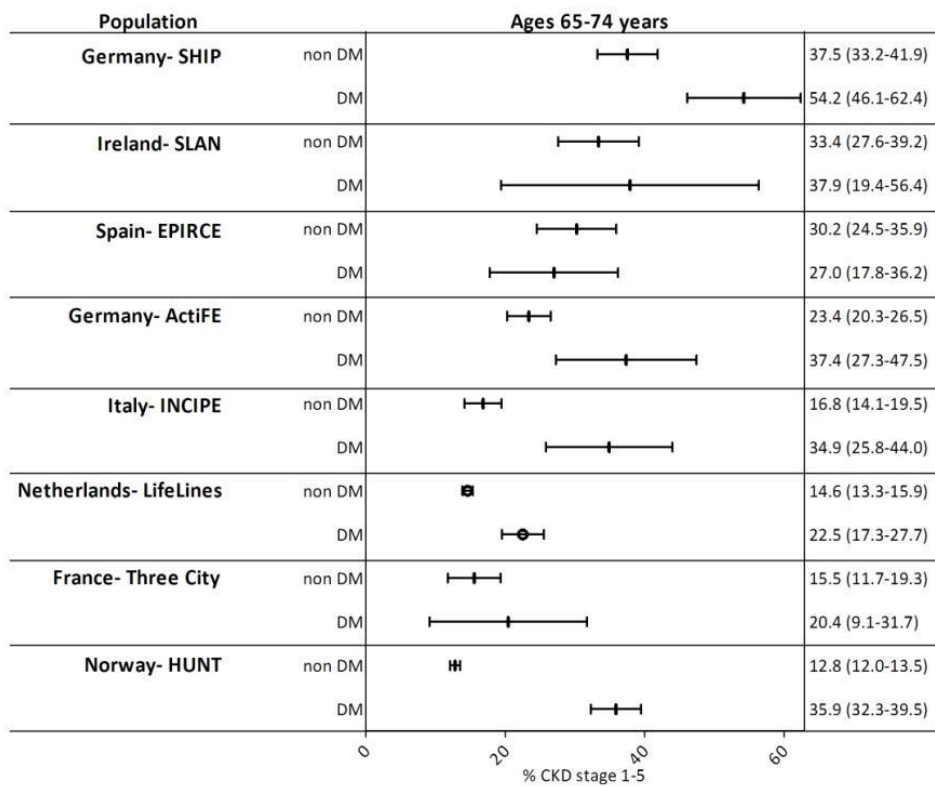

c: by hypertensive status

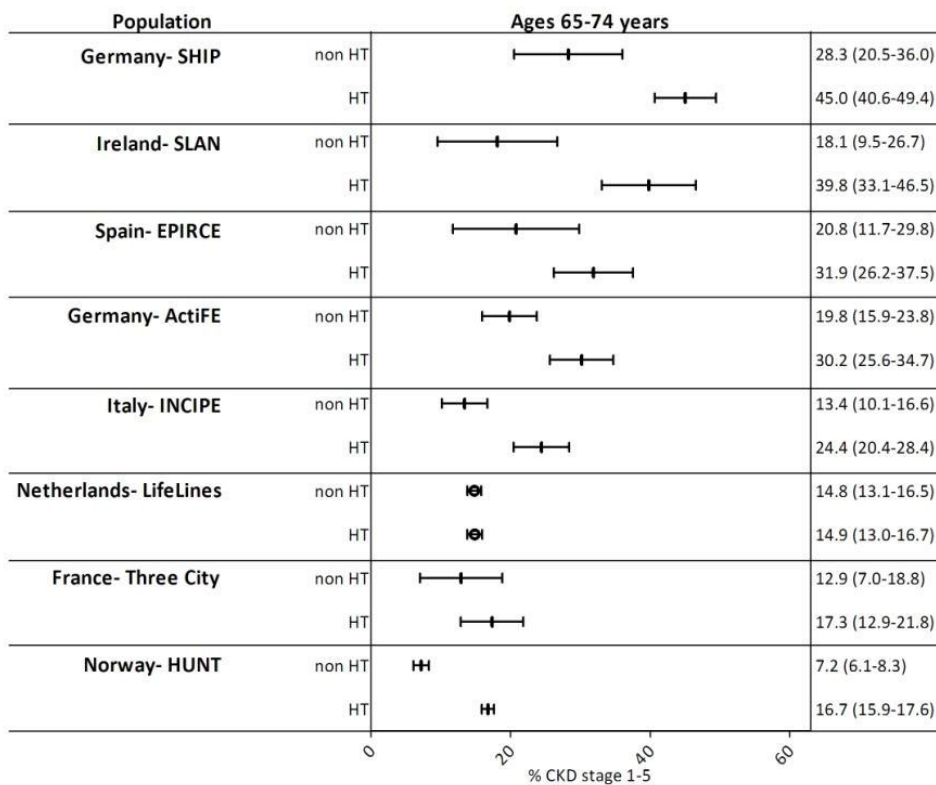

⊖ studies using enzymatic method, | studies using Jaffe method. DM= diabetes mellitus, HT= hypertension. Three City data from subgroup population with albuminuria data measured 4 years after study inclusion.

Figure 2.3: CKD stage 1-5 prevalence (95%CI) in age group 65-74 years, in studies using IDMS traceable creatinine.

d: by obesity status

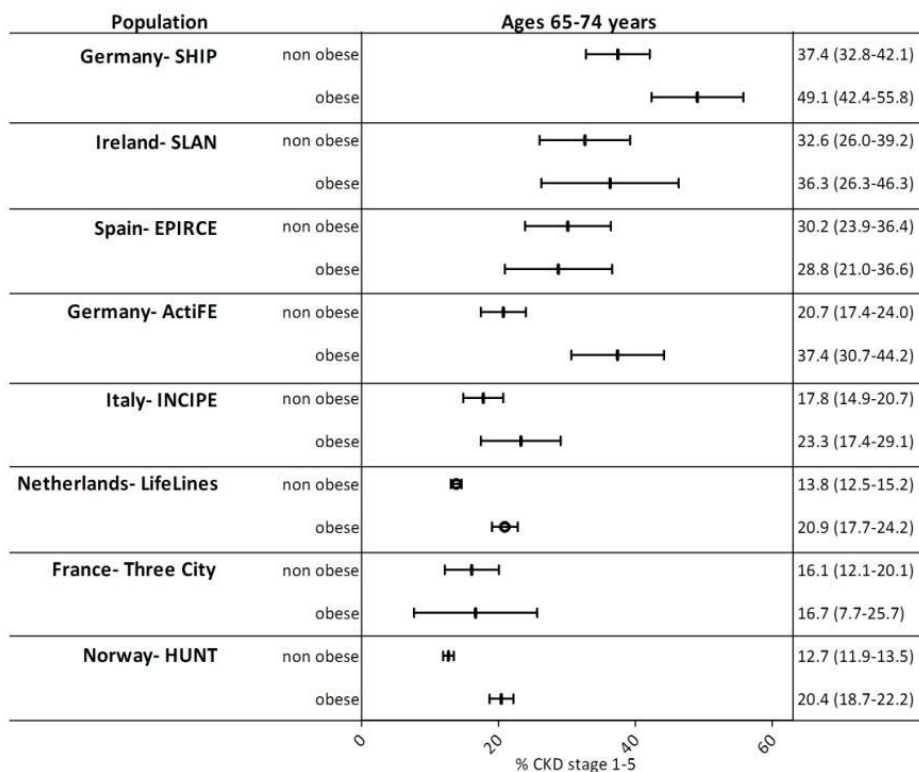

⊖ studies using enzymatic method, | studies using Jaffe method. HT= hypertension. Three City data from subgroup population with albuminuria data measured 4 years after study inclusion.

Figure 2.3: CKD stage 1-5 prevalence (95%CI) age group 65-74 years, in studies using non-IDMS traceable creatinine.

a: overall population

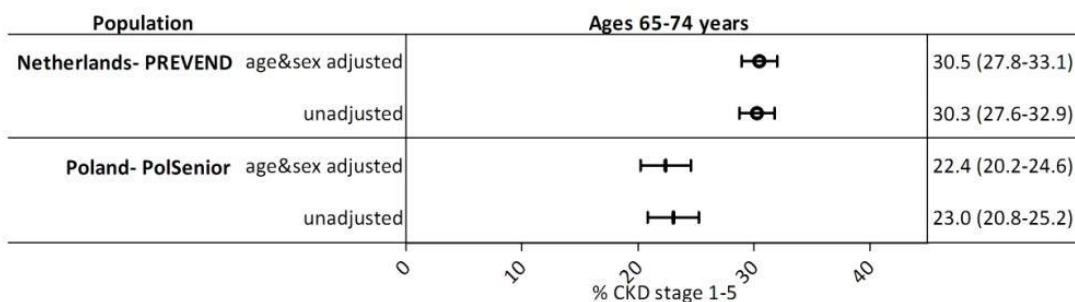

b: by diabetic status

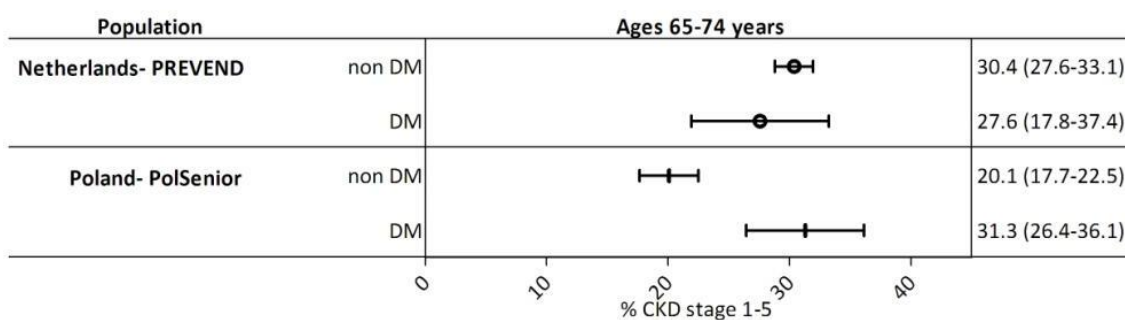

c: by hypertensive status

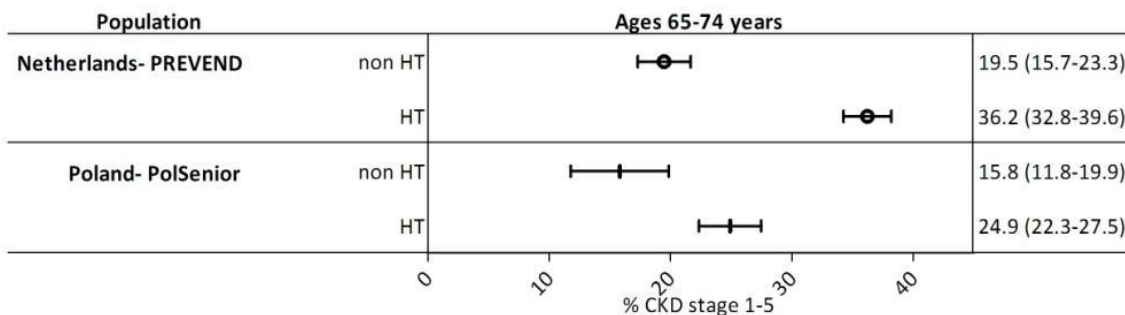

d: by obesity status

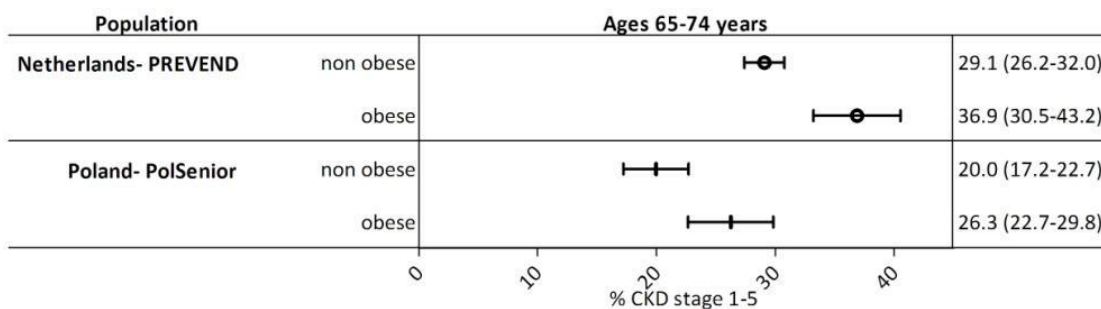

Adjusted prevalence was age and sex adjusted to the EU27 population of 2005.  $\ominus$  studies using enzymatic method, | studies using Jaffe method. DM = diabetes mellitus, HT= hypertension. In the PREVEND study all known diabetics were excluded, therefore the prevalence in diabetics is likely an underrepresentation of the true CKD prevalence in diabetics.

Figure 2.4: CKD stage 1-5 prevalence (95%CI) in age group 75-84 years, in studies using IDMS traceable creatinine.  
a: overall population

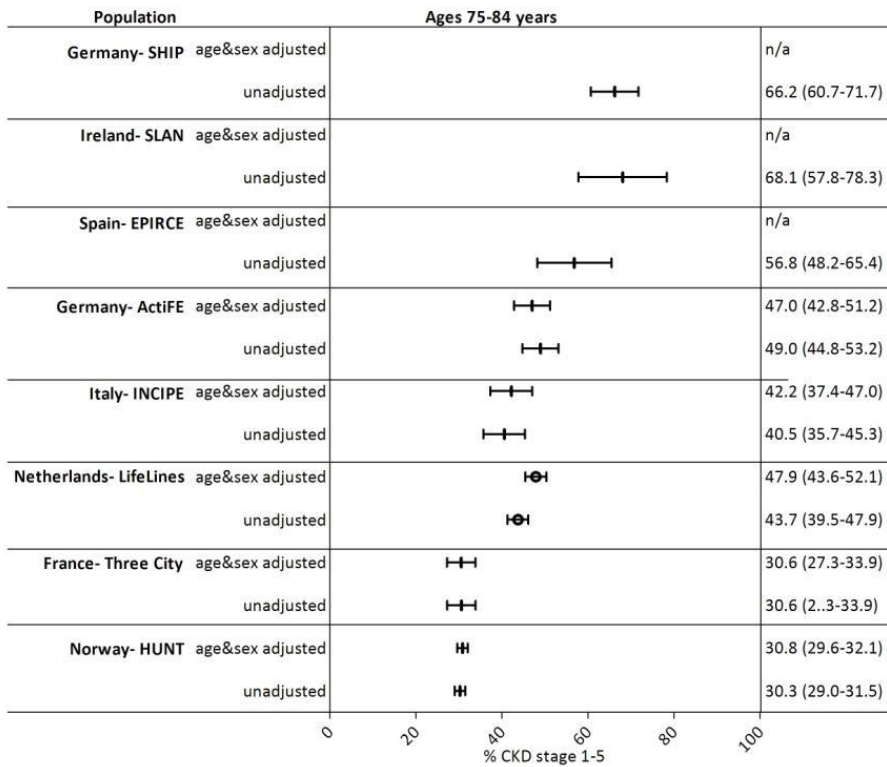

b: by diabetic status

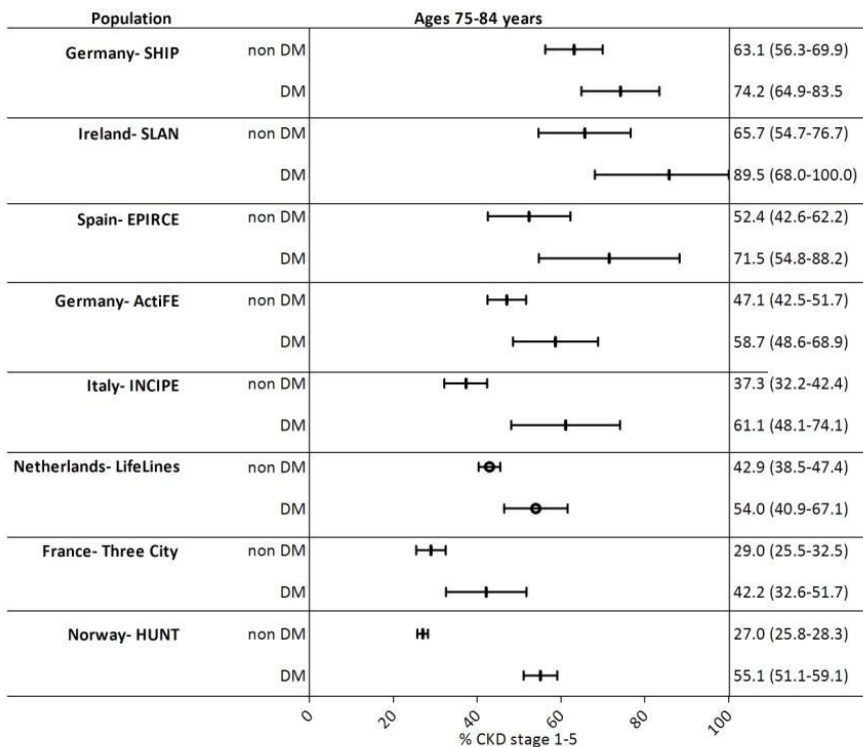

Adjusted prevalence was age and sex adjusted to the EU27 population of 2005.  $\Theta$  studies using enzymatic method, | studies using Jaffe method. DM= diabetes mellitus



Figure 2.4: CKD stage 1-5 prevalence (95%CI) in age group 75-84 years, in studies using IDMS traceable creatinine.

c: by hypertensive status

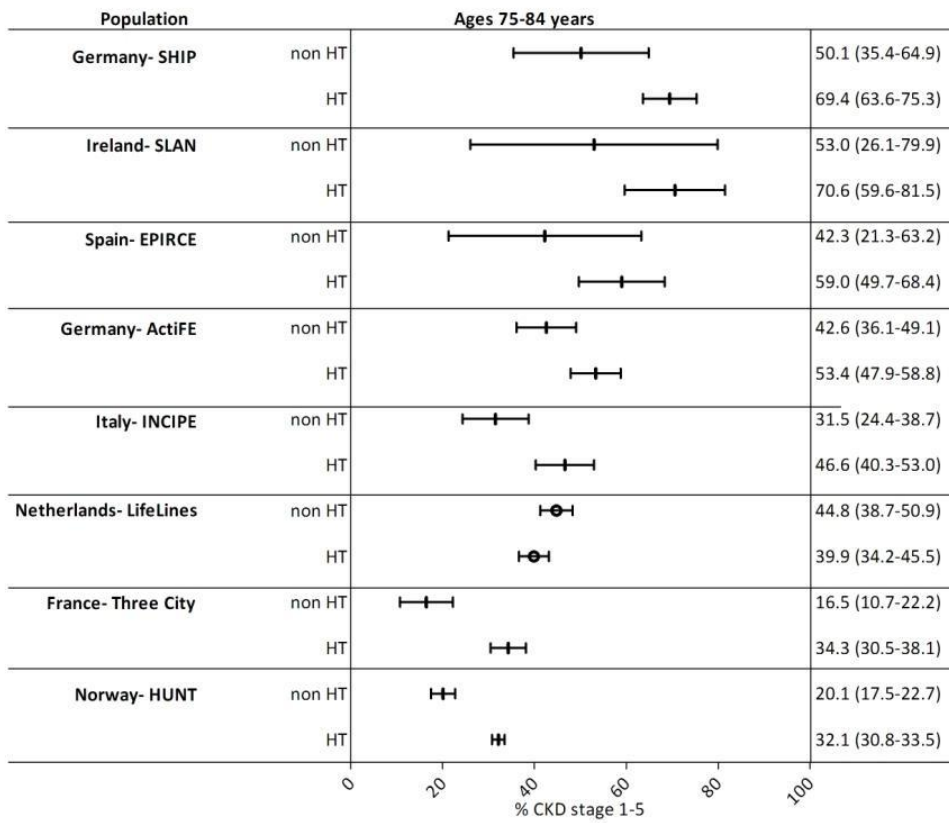

⊖ studies using enzymatic method, | studies using Jaffe method. HT= hypertension. Three City data from subgroup population with albuminuria data measured 4 years after study inclusion.

Figure 2.4: CKD stage 1-5 prevalence (95%CI) in age group 75-84 years, in studies using IDMS traceable creatinine.

d: by obesity status

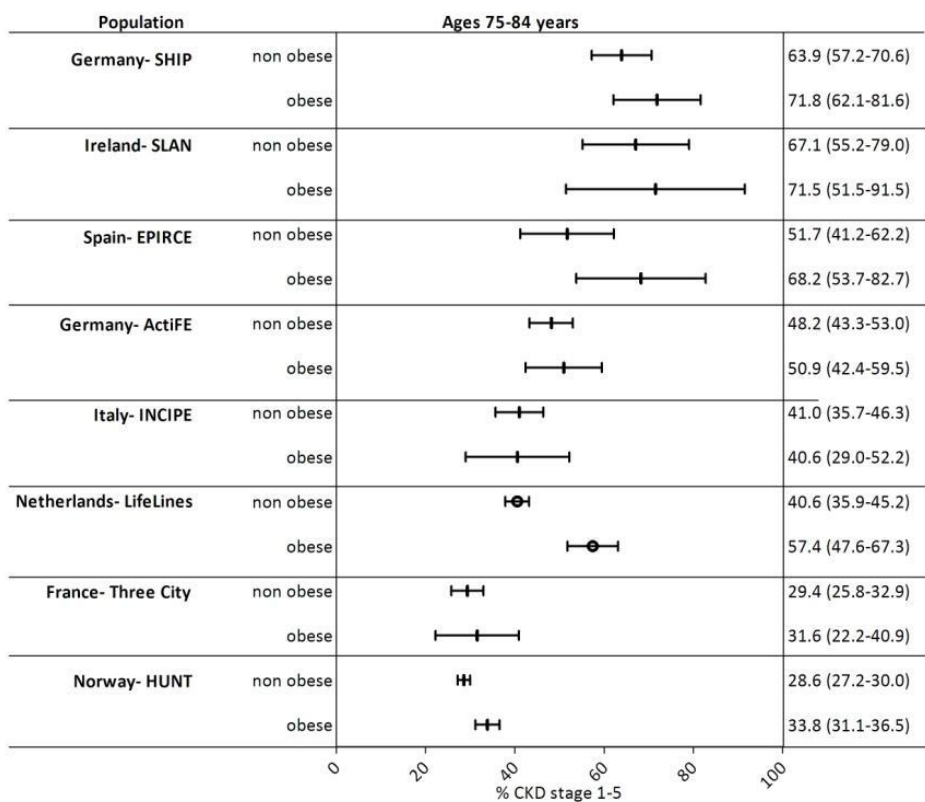

⊖ studies using enzymatic method, | studies using Jaffe method. HT= hypertension. Three City data from subgroup population with albuminuria data measured 4 years after study inclusion.

Figure 2.4: CKD stage 1-5 prevalence (95%CI) in age group 75-84 years, in studies using non-IDMS traceable creatinine.

a: overall population

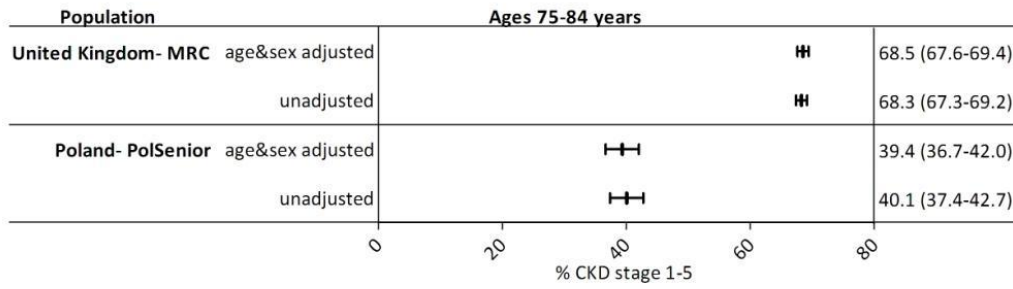

b: by diabetic status

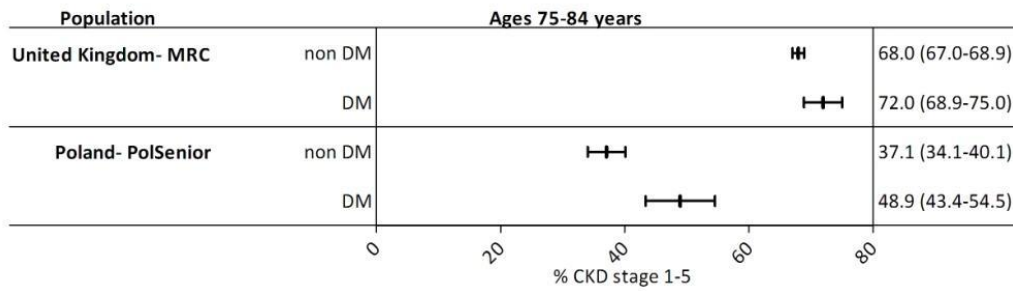

c: by hypertensive status

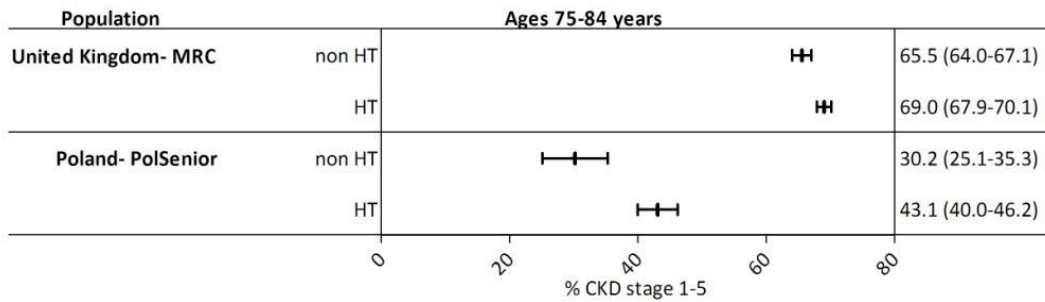

d: by obesity status

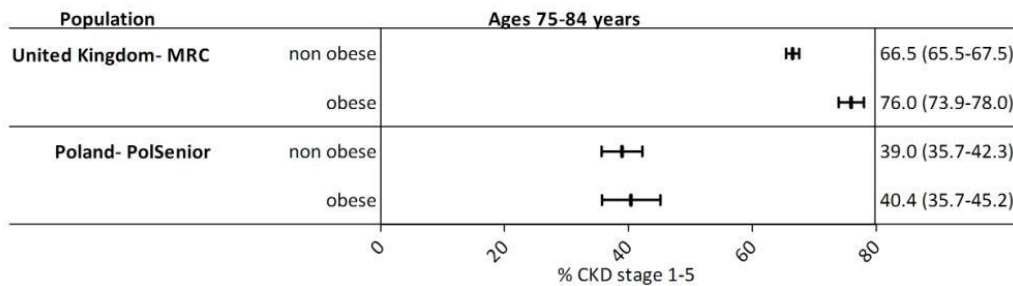

Adjusted prevalence was age and sex adjusted to the EU27 population of 2005. DM = diabetes mellitus, HT= hypertension. | studies using Jaffe method. MRC study results are comprised of a combination of enzymatic and Jaffe results, for investigators did not distinguish results by measurement method.

## **CKD stage 3-5 prevalence**

Figure 3: CKD stage 3-5 prevalence (95%CI) in the adult population, IDMS studies.

a: overall population

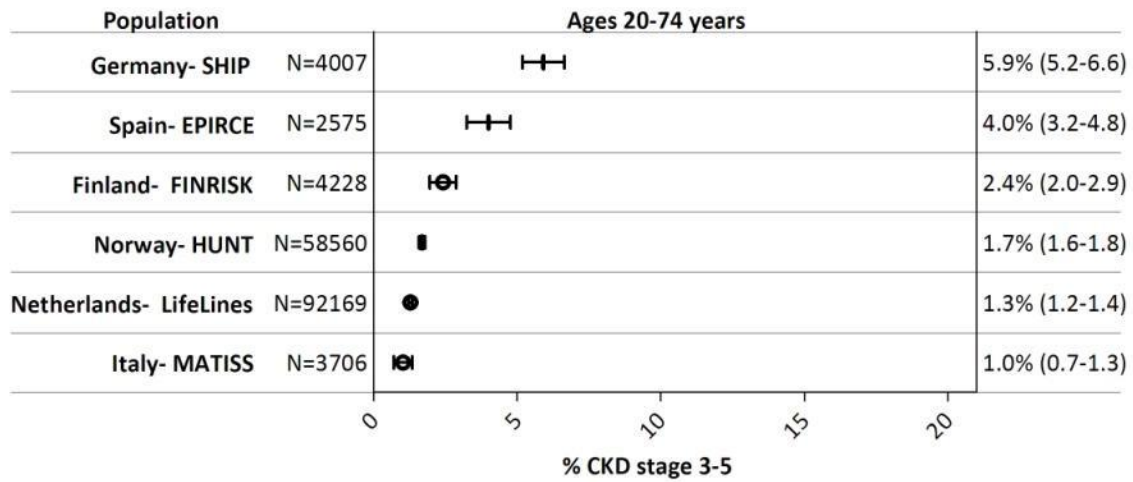

b: by diabetic status

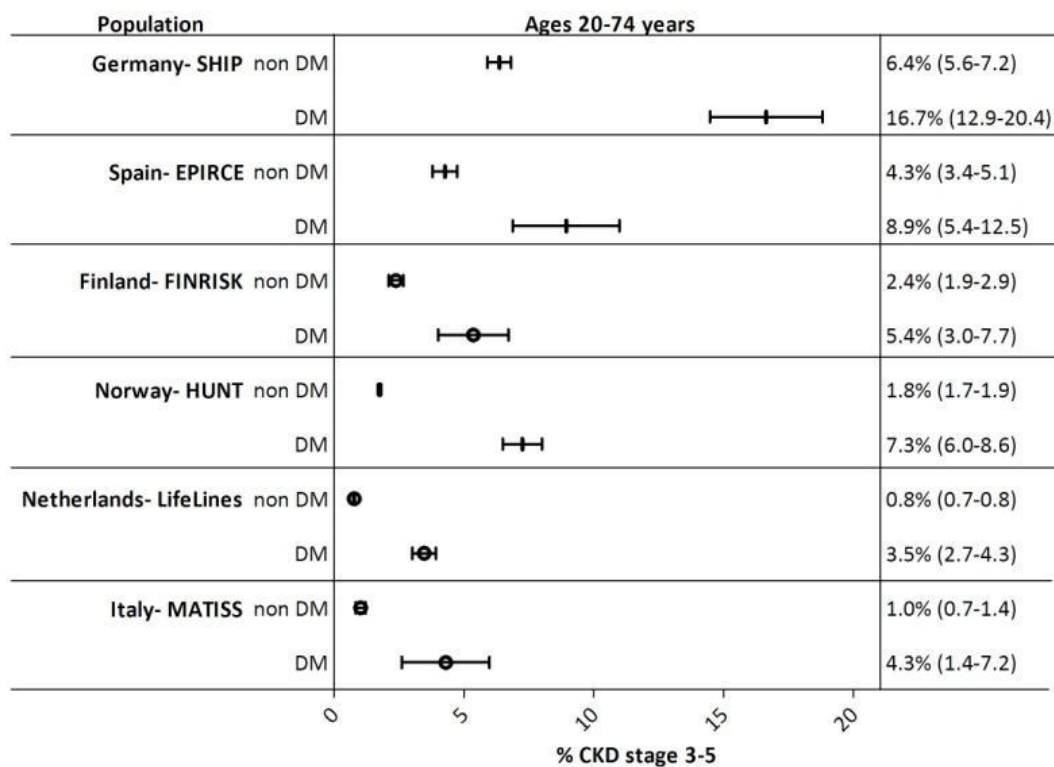

Adjusted prevalence was age and sex adjusted to the EU27 population of 2005. ◐ studies using enzymatic method, | studies using Jaffe method. DM = diabetes mellitus, HT= hypertension

c: by hypertensive status

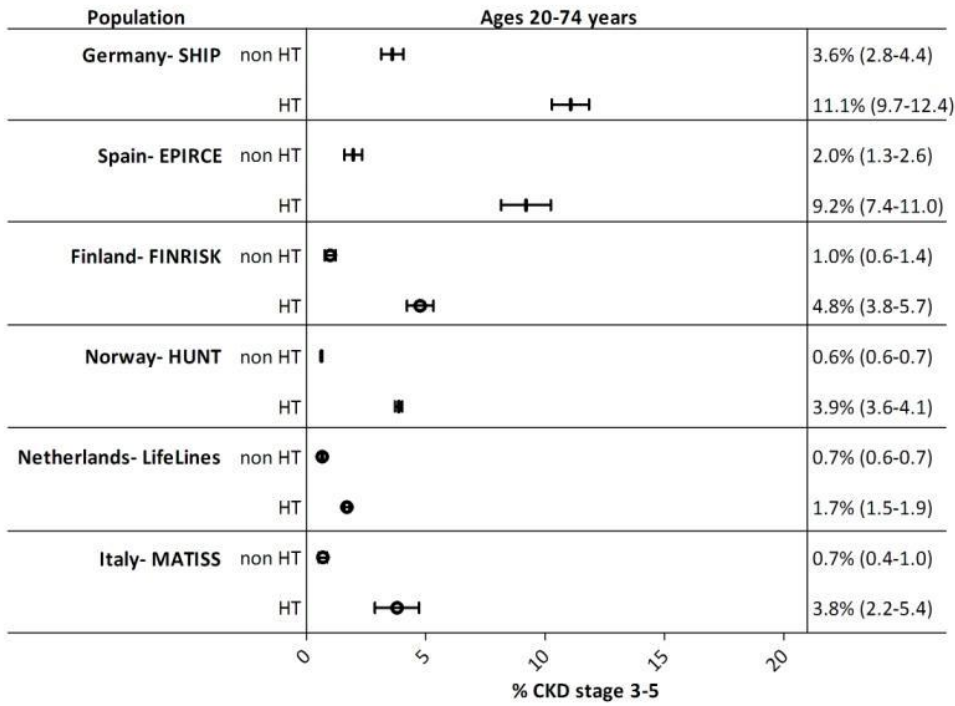

d: by obesity status

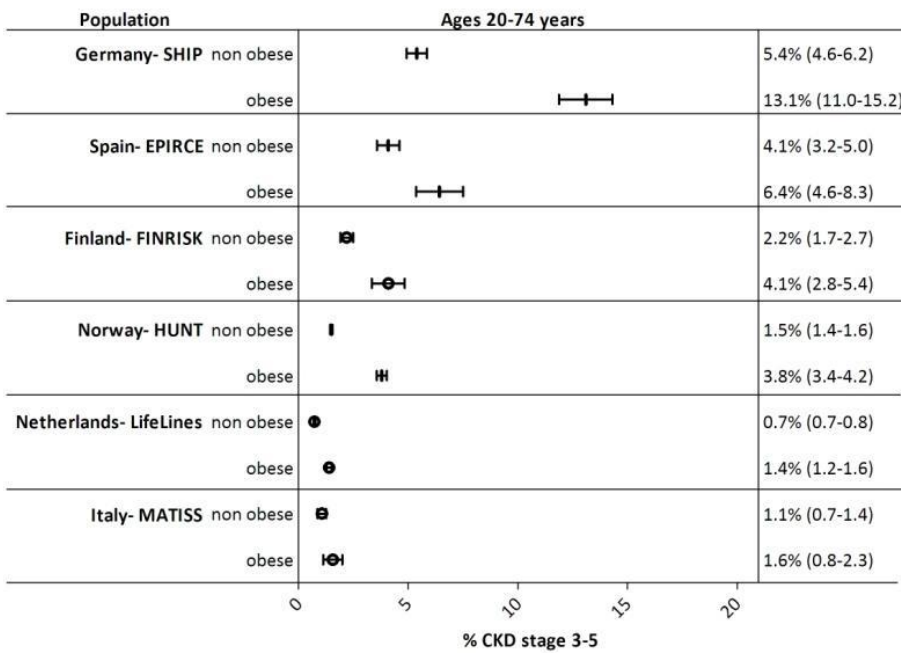

⊖ studies using enzymatic method, | studies using Jaffe method. HT= hypertension

Figure 3: CKD stage 3-5 prevalence (95%CI) in the adult population, non IDMS studies.

a: overall population

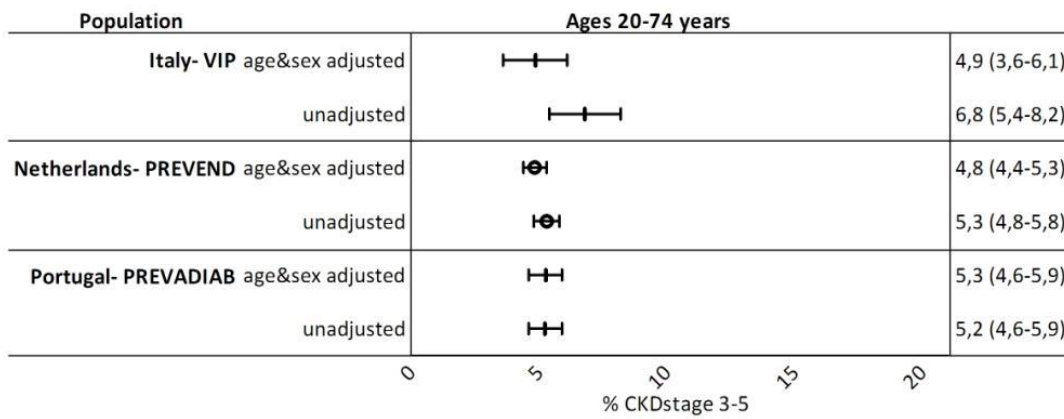

b: by diabetic status

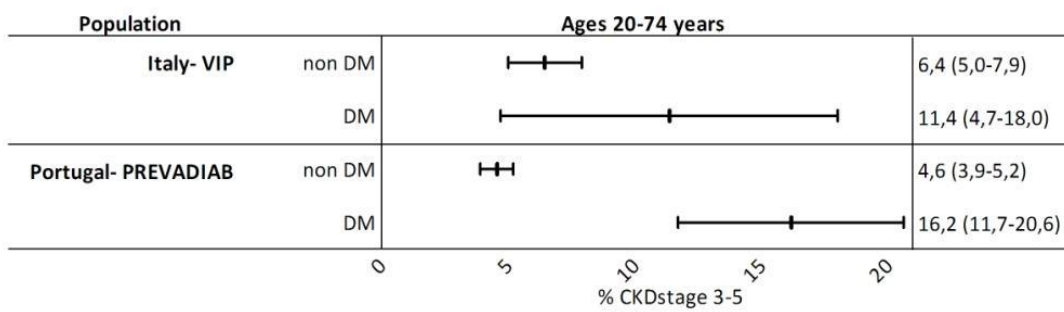

c: by hypertensive status

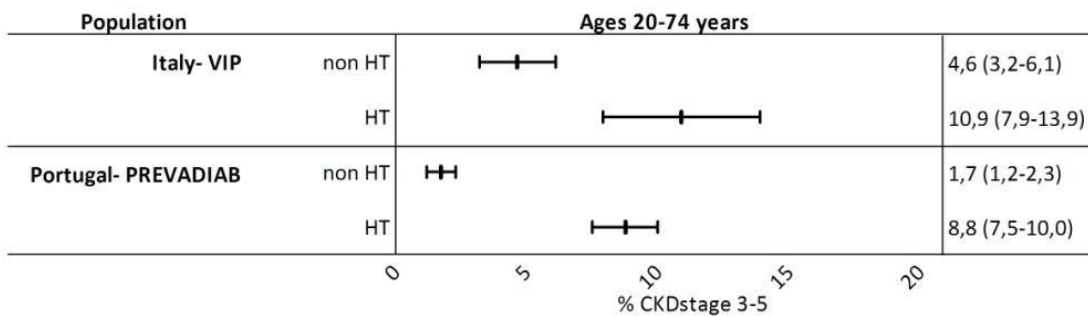

d: by obesity status

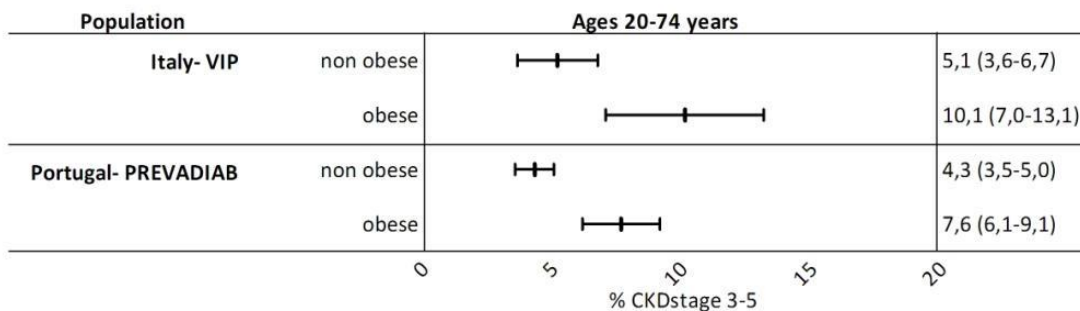

Adjusted prevalence was age and sex adjusted to the EU27 population of 2005.  $\Theta$  studies using enzymatic method, | studies using Jaffe method. DM = diabetes mellitus, HT= hypertension

Figure 4.1: CKD stage 3-5 prevalence (95%CI) in age group 20-44 years, in studies using IDMS traceable creatinine.

a: overall population

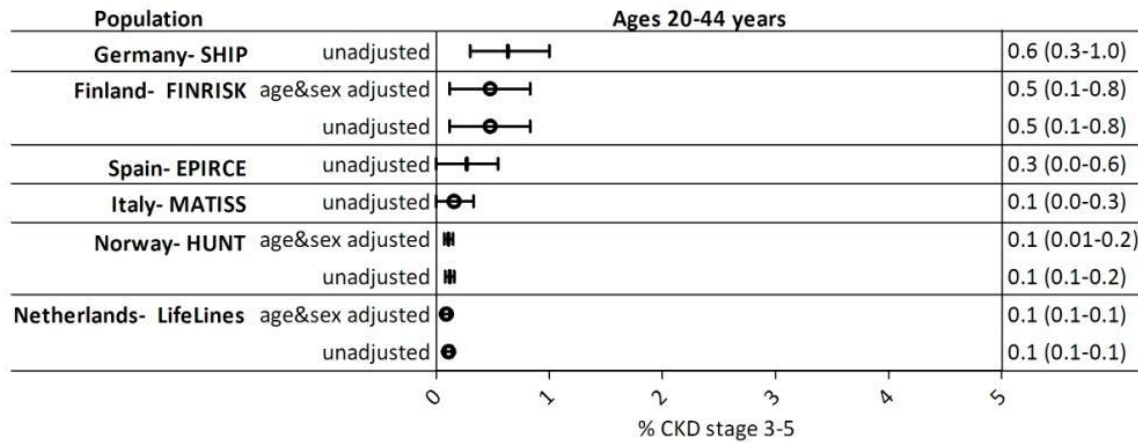

b: by diabetic status

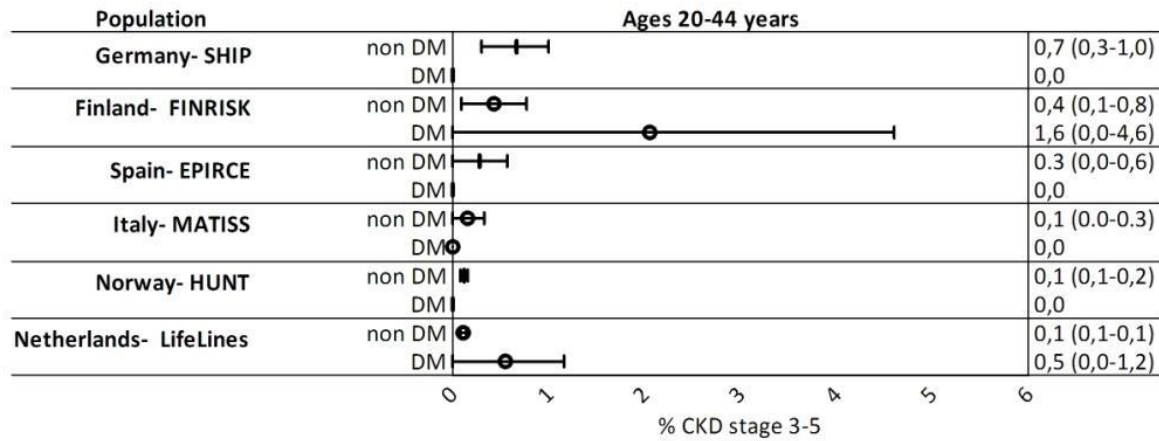

c: by hypertensive status

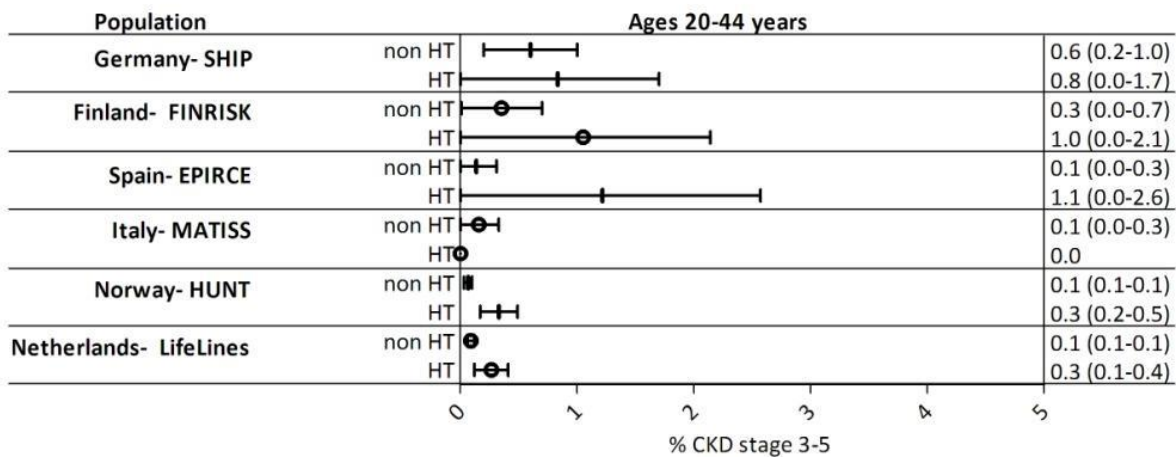

Adjusted prevalence was age and sex adjusted to the EU27 population of 2005.  $\ominus$  studies using enzymatic method, | studies using Jaffe method. DM = diabetes mellitus, HT= hypertension



Figure 4.1: CKD stage 3-5 prevalence (95%CI) in age group 20-44 years, in studies using IDMS traceable creatinine.

d: by obesity status

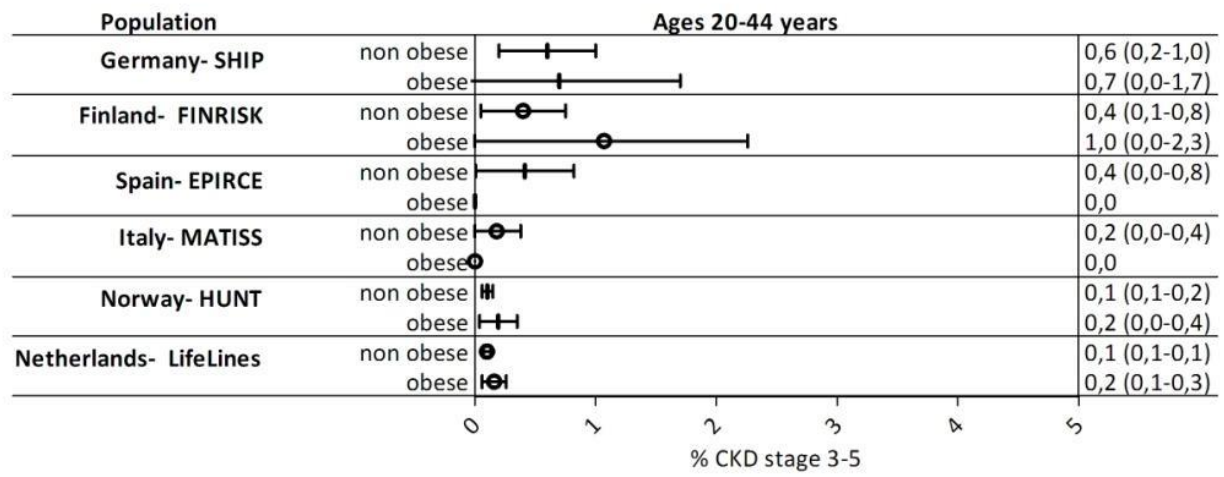

○ studies using enzymatic method, □ studies using Jaffe method.

Figure 4.1: CKD stage 3-5 prevalence (95%CI) in age group 20-44 years, in study using non- IDMS traceable creatinine.

a: overall population

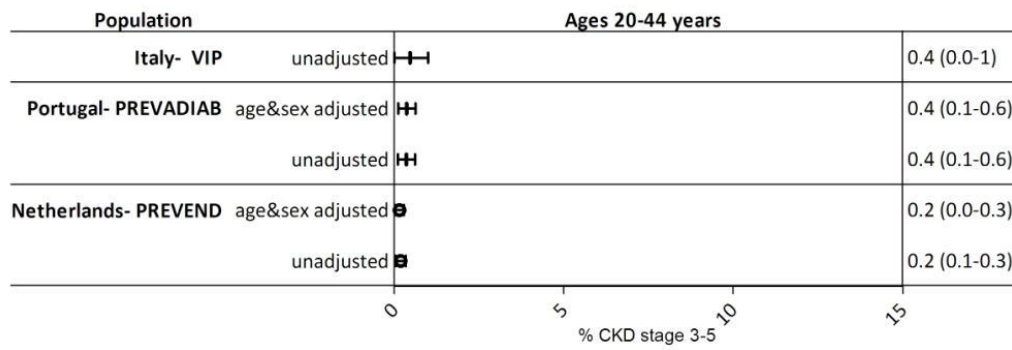

b: by diabetic status

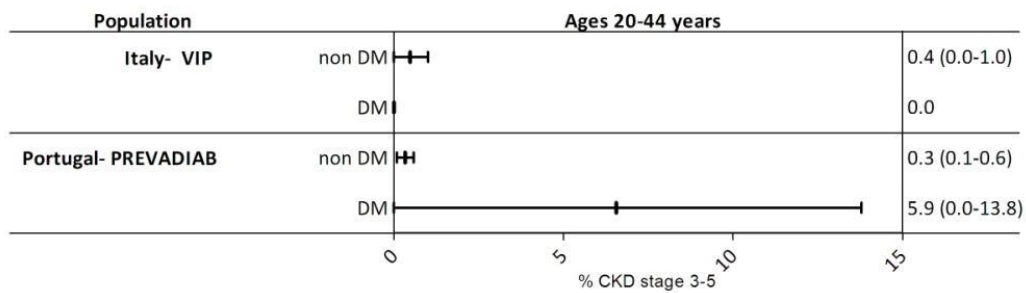

c: by hypertensive status

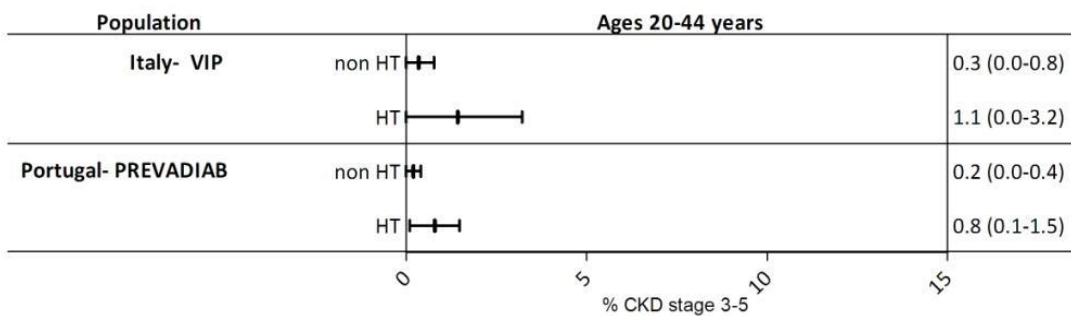

d: by obesity status

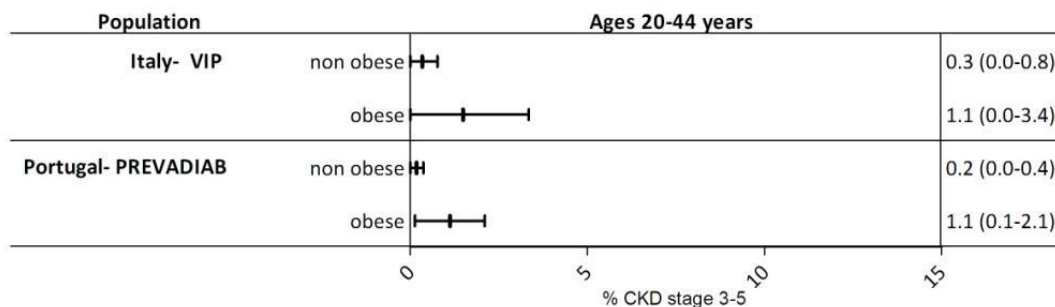

Adjusted prevalence was age and sex adjusted to the EU27 population of 2005.  $\Theta$  studies using enzymatic method, | studies using Jaffe method. DM = diabetes mellitus, HT= hypertension.

Figure 4.2: CKD stage 3-5 prevalence (95%CI) in age group 45-64 years, in studies using IDMS traceable creatinine.

a: overall population

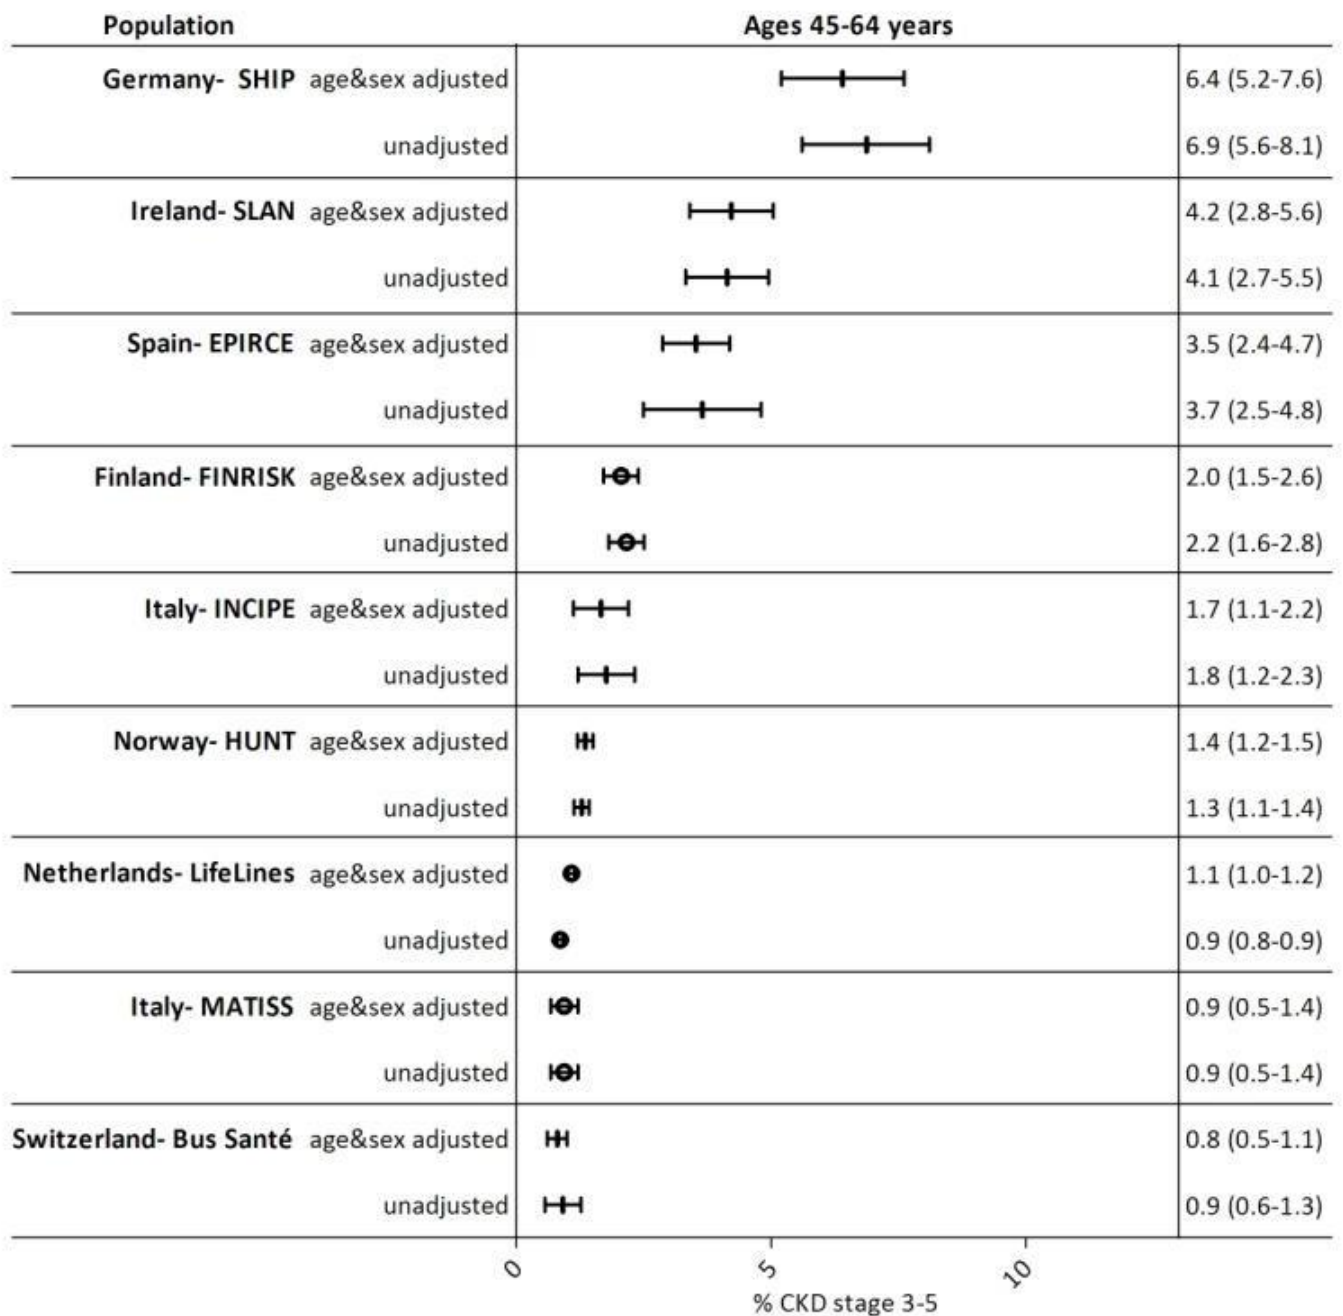

Adjusted prevalence was age and sex adjusted to the EU27 population of 2005. ⊖ studies using enzymatic method, | studies using Jaffe method.

Figure 4.2: CKD stage 3-5 prevalence (95%CI) in age group 45-64 years, in studies using IDMS traceable creatinine.

b: by diabetic status

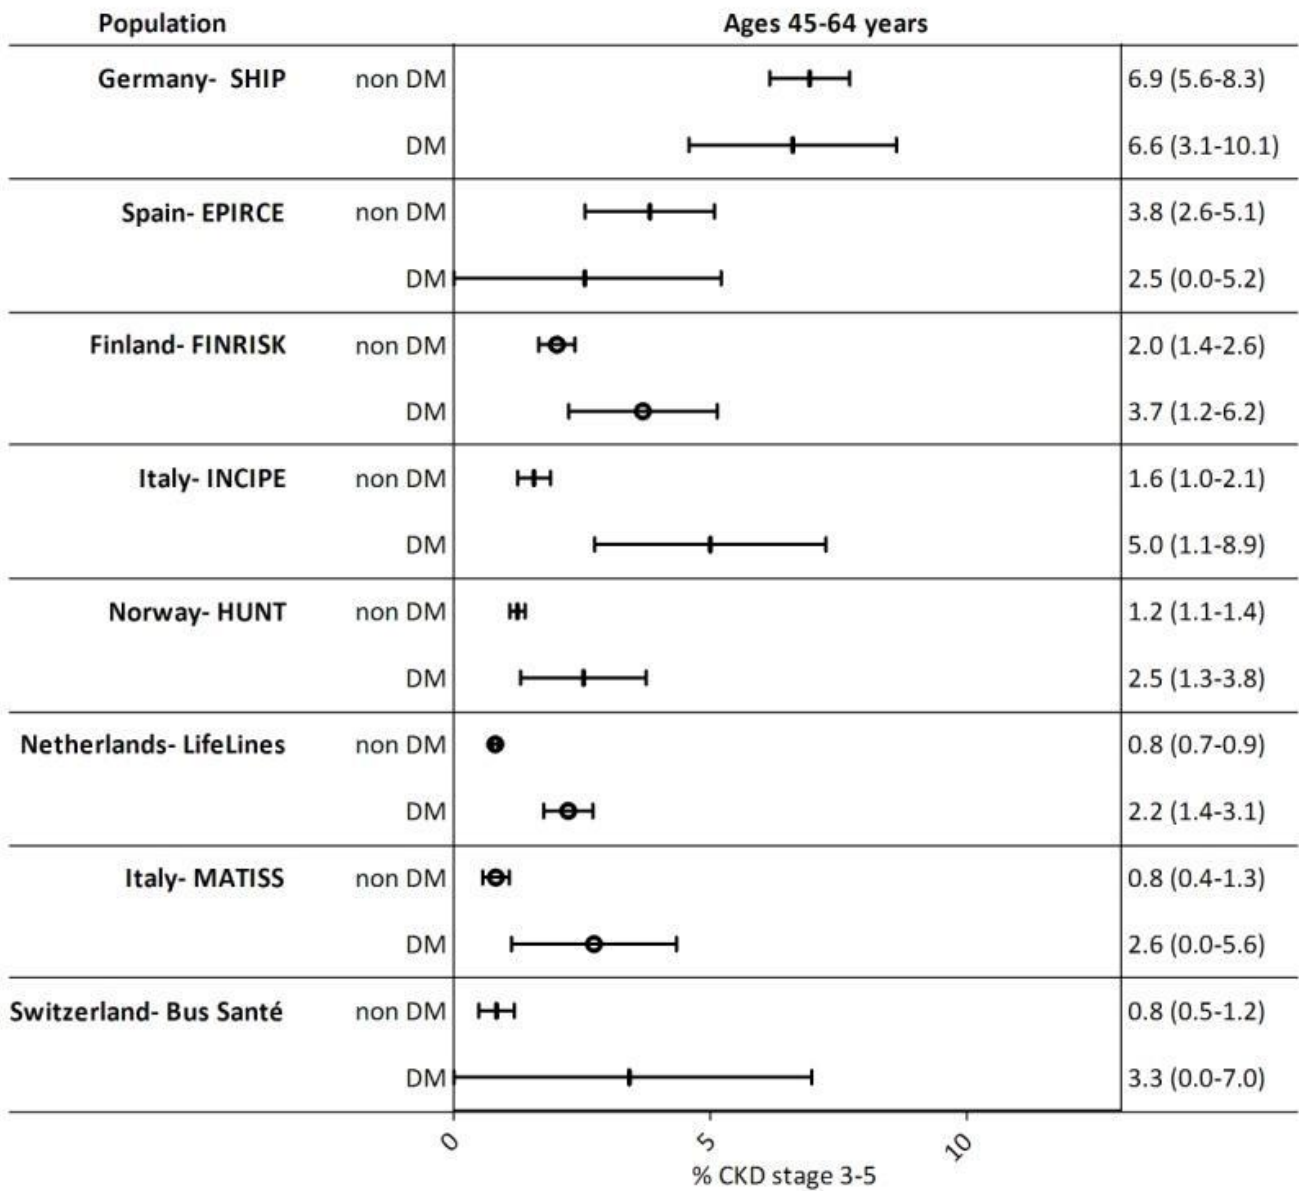

⊙ studies using enzymatic method, | studies using Jaffe method. DM = diabetes mellitus.



Figure 4.2: CKD stage 3-5 prevalence (95%CI) in age group 45-64 years, in studies using IDMS traceable creatinine.

d: by obesity status

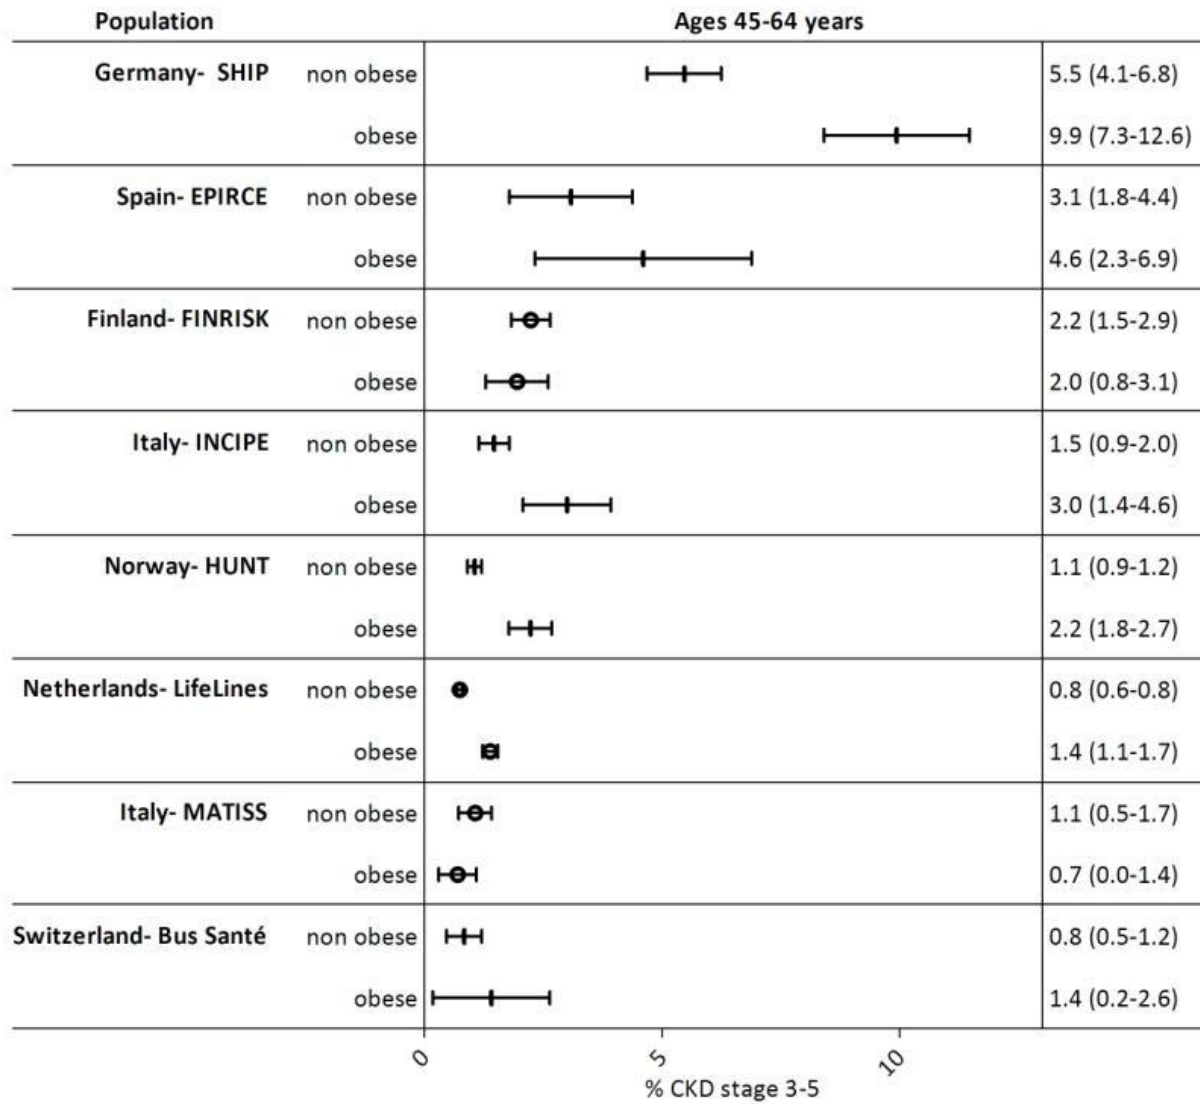

○ studies using enzymatic method, □ studies using Jaffe method.

Figure 4.2: CKD stage 3-5 prevalence (95%CI) in age group 45-64 years , in studies using non IDMS traceable creatinine.

a: overall population

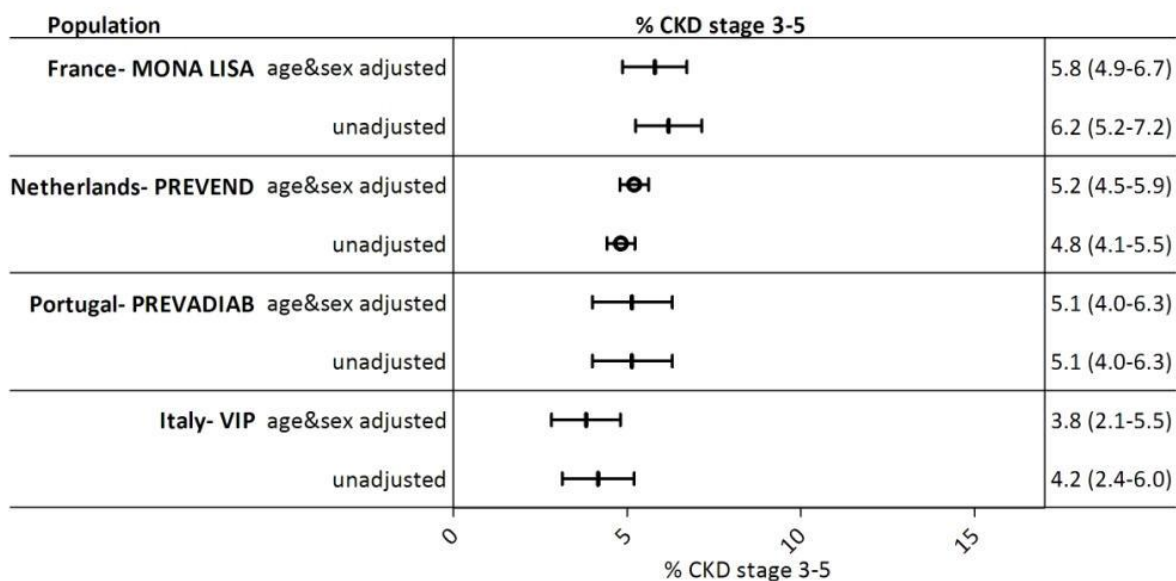

b: by diabetic status

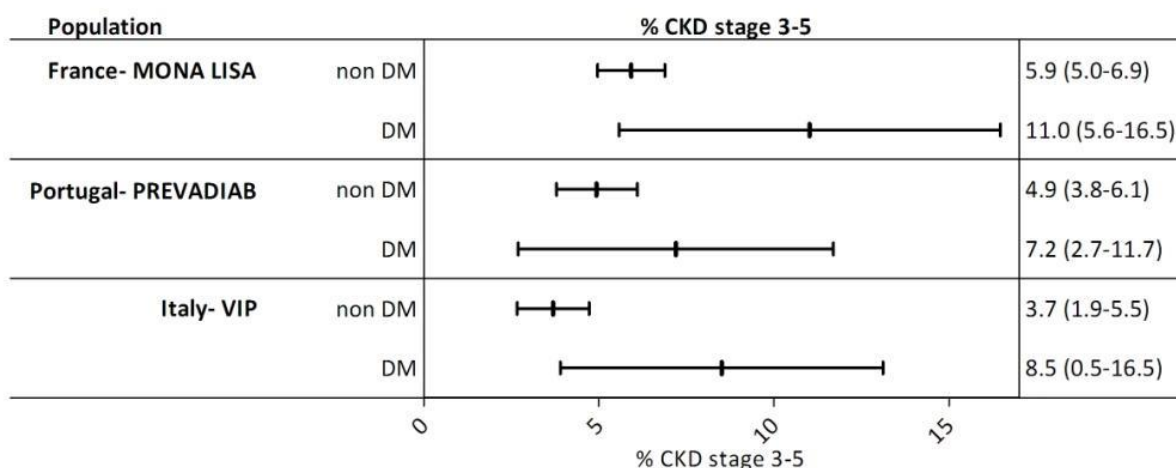

Adjusted prevalence was age and sex adjusted to the EU27 population of 2005.  $\Theta$  studies using enzymatic method, | studies using Jaffe method. DM = diabetes mellitus.

Figure 4.2: CKD stage 3-5 prevalence (95%CI) in age group 45-64 years , in studies using non IDMS traceable creatinine.

c: by hypertensive status

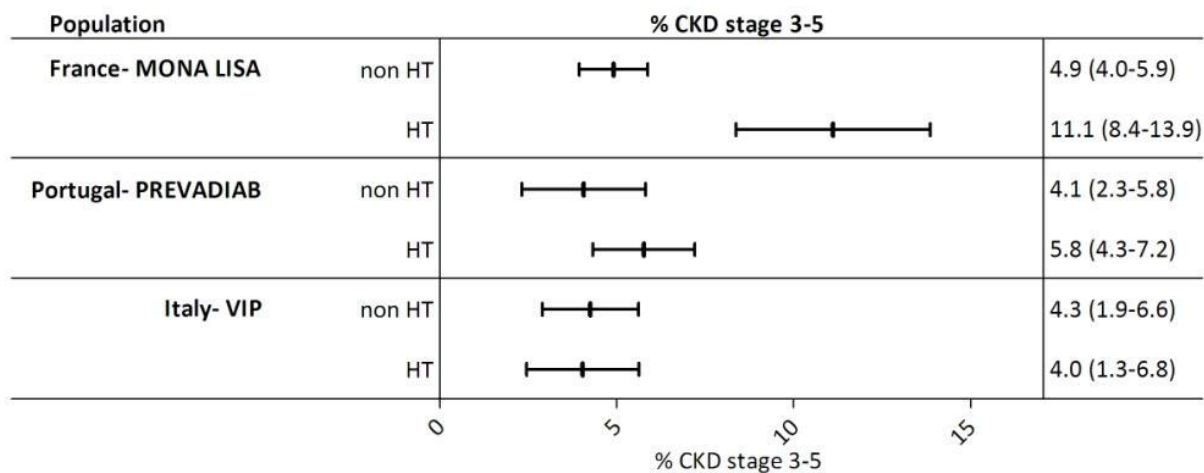

d: by obesity status

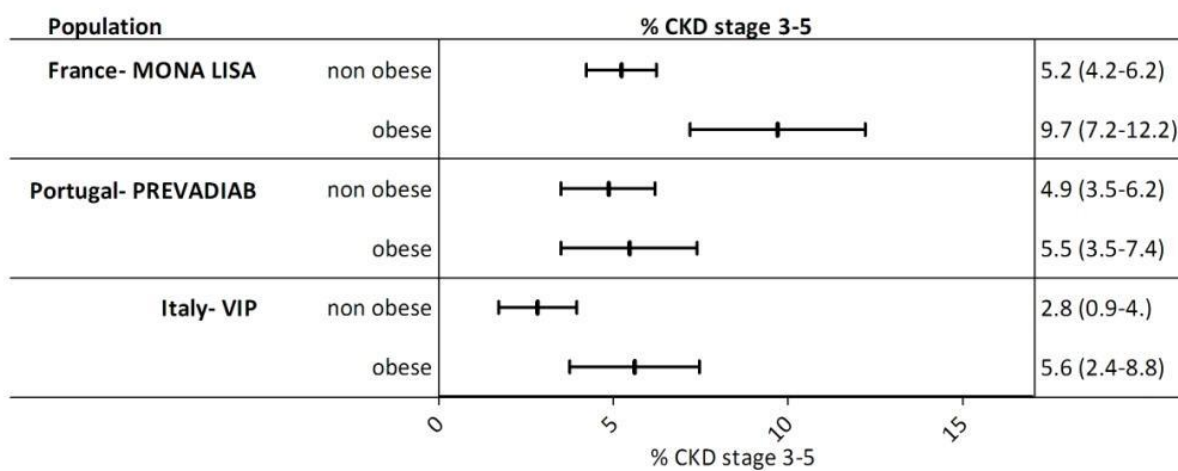

| studies using Jaffe method. HT= hypertension.



Figure 4.3: CKD stage 3-5 prevalence (95%CI) in age group 65-74 years, in studies using IDMS traceable creatinine.

a: overall population

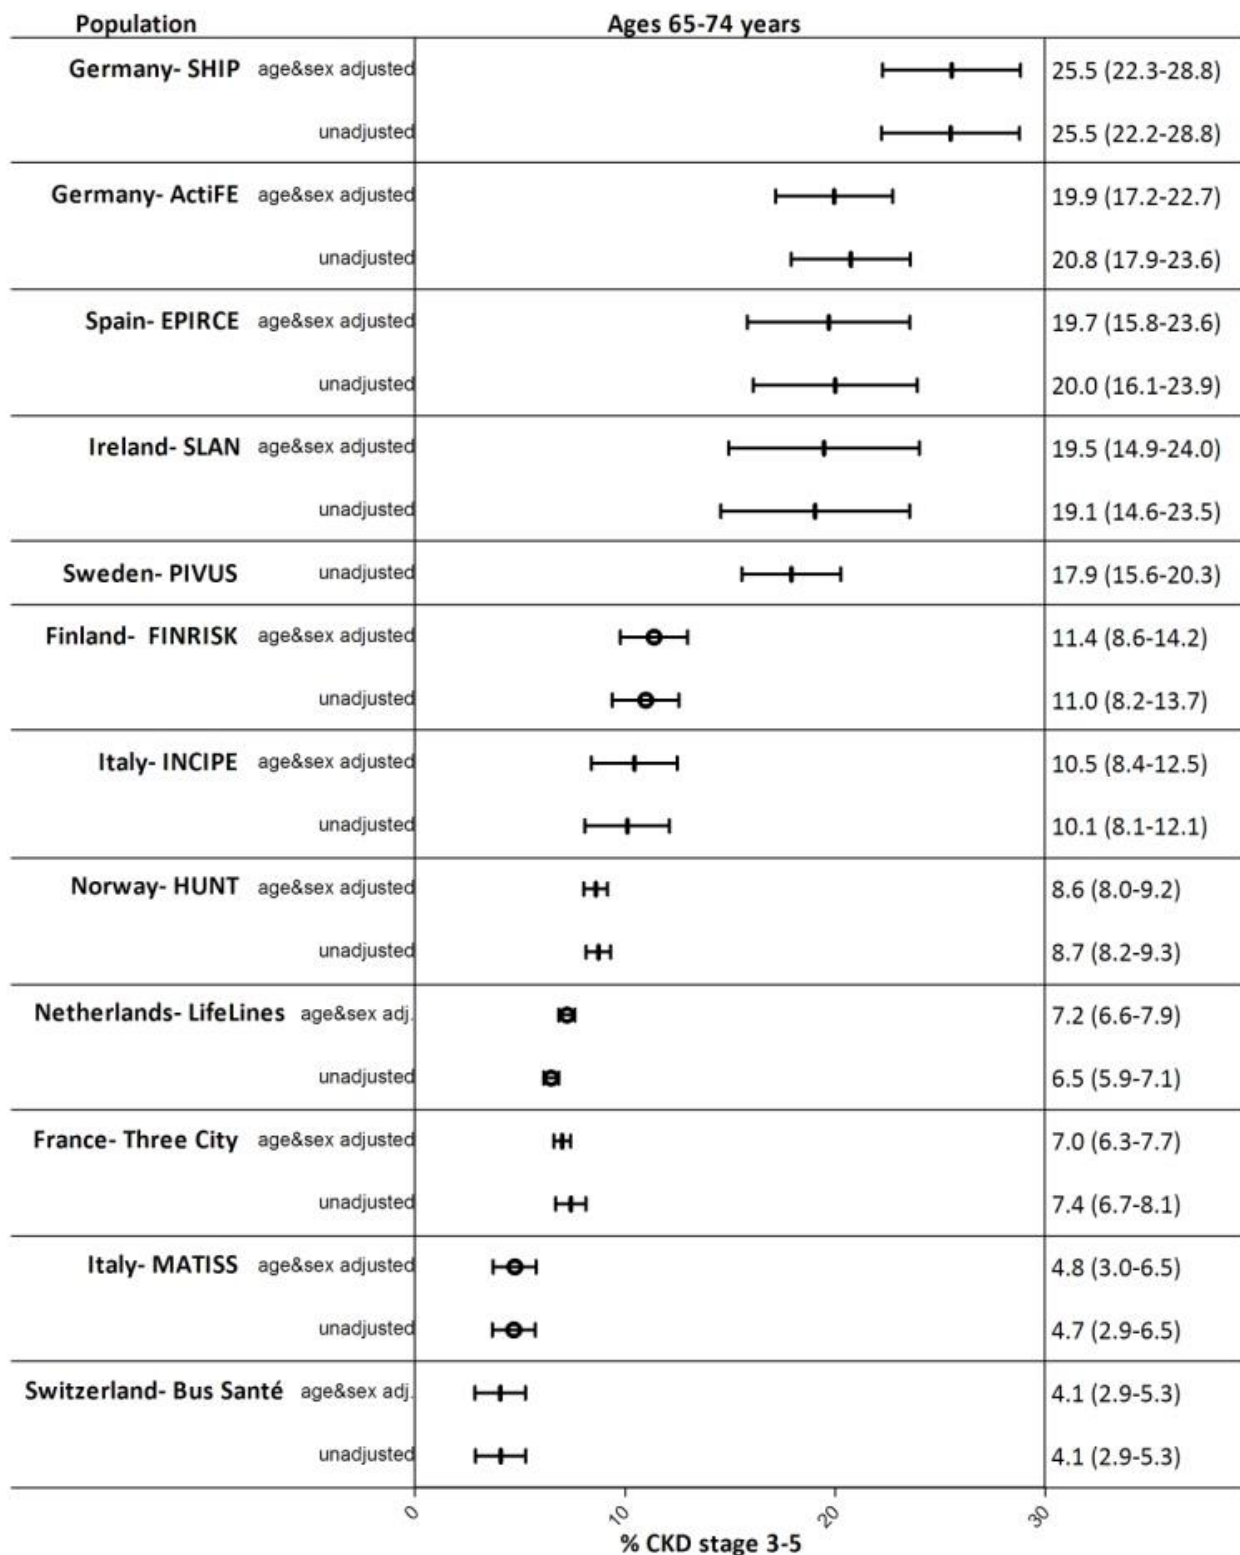

Adjusted prevalence was age and sex adjusted to the EU27 population of 2005.  $\ominus$  studies using enzymatic method, | studies using Jaffe method.

Figure 4.3: CKD stage 3-5 prevalence (95%CI) in age group 65-74 years, in studies using IDMS traceable creatinine.

b: by diabetic status

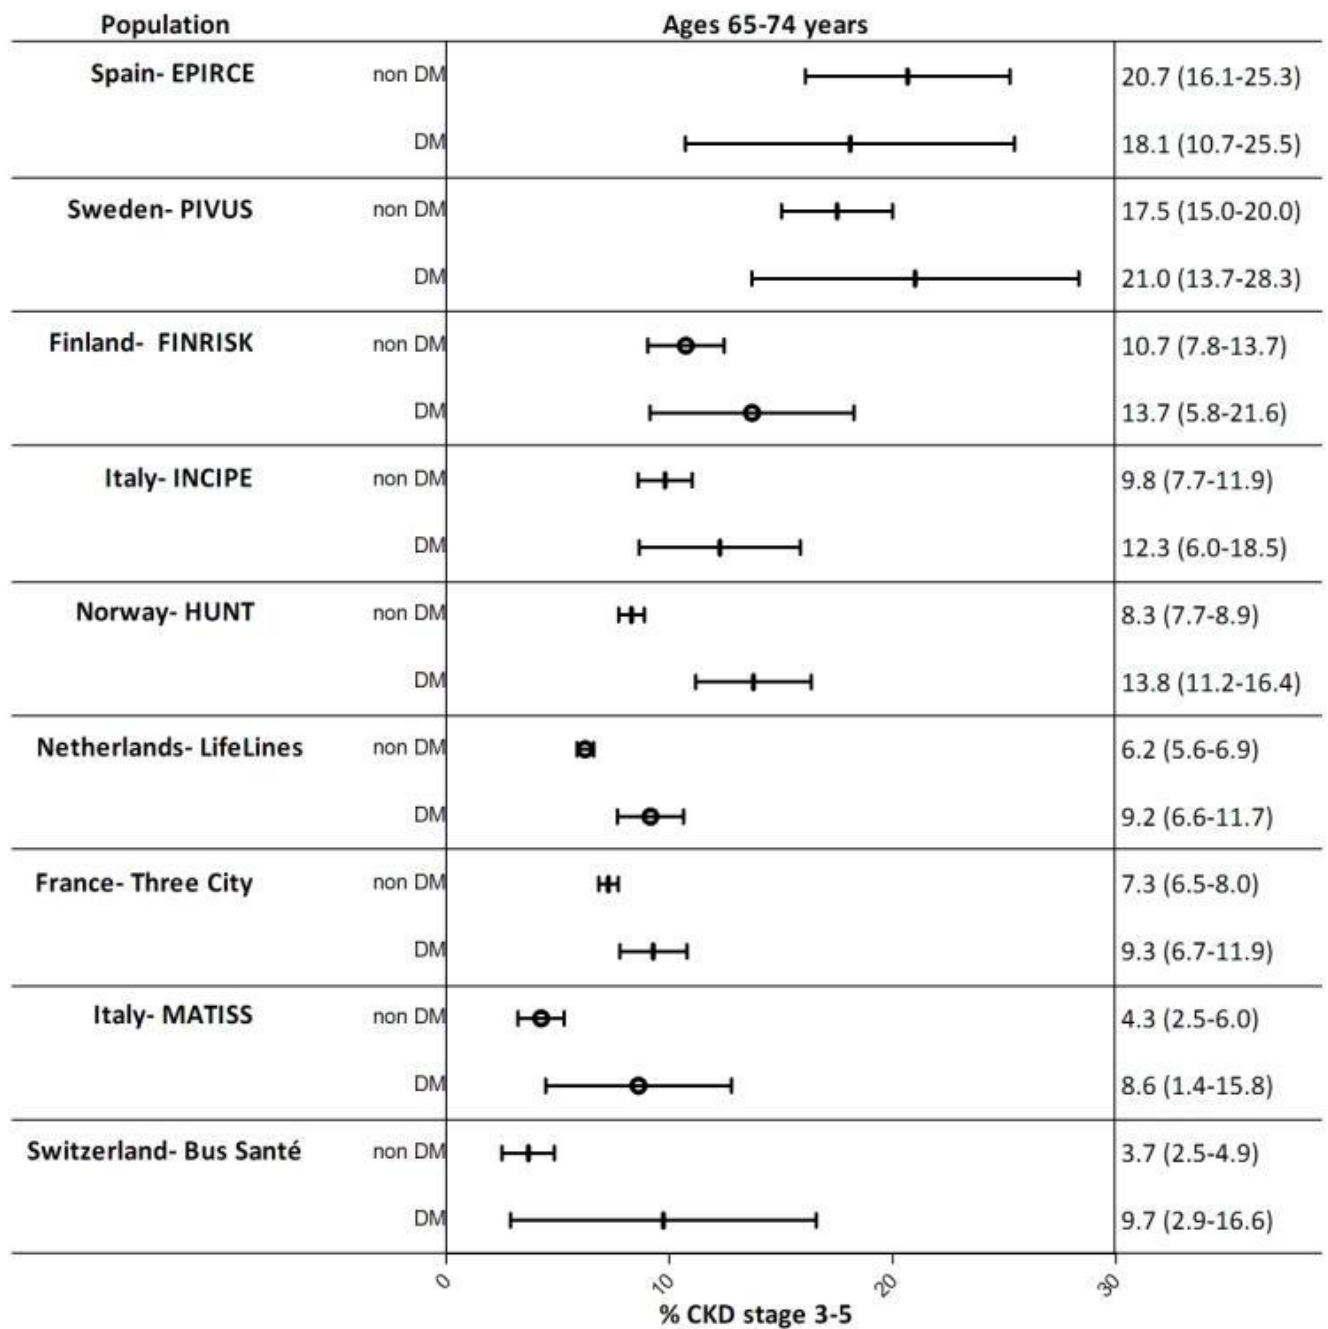

⊖ studies using enzymatic method, | studies using Jaffe method. DM = diabetes mellitus.

Figure 4.3: CKD stage 3-5 prevalence (95%CI) in age group 65-74 years, in studies using IDMS traceable creatinine.

c: by hypertensive status

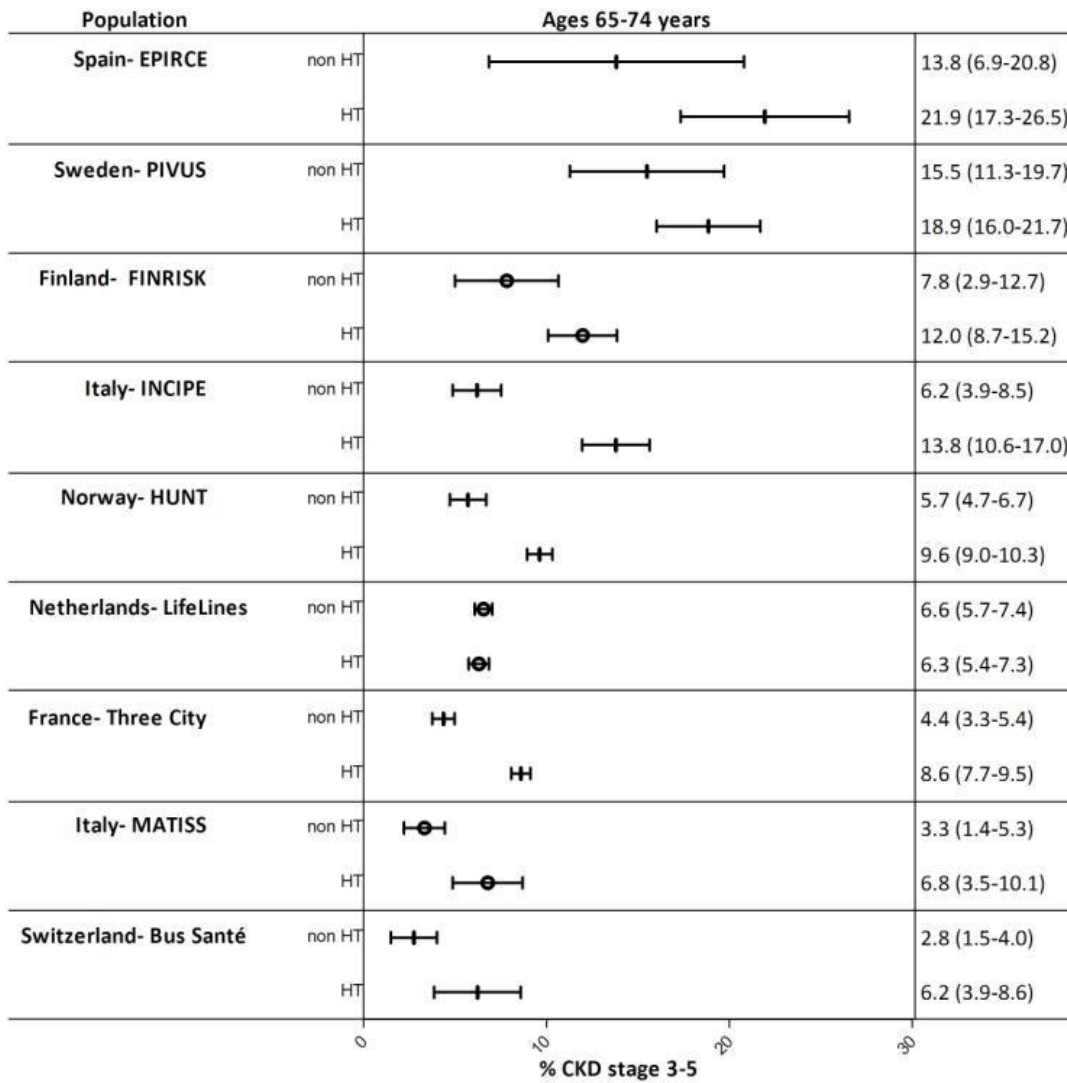

⊖ studies using enzymatic method, | studies using Jaffe method. HT= hypertension.

Figure 4.3: CKD stage 3-5 prevalence (95%CI) in age group 65-74 years, in studies using IDMS traceable creatinine.

d: by obesity status

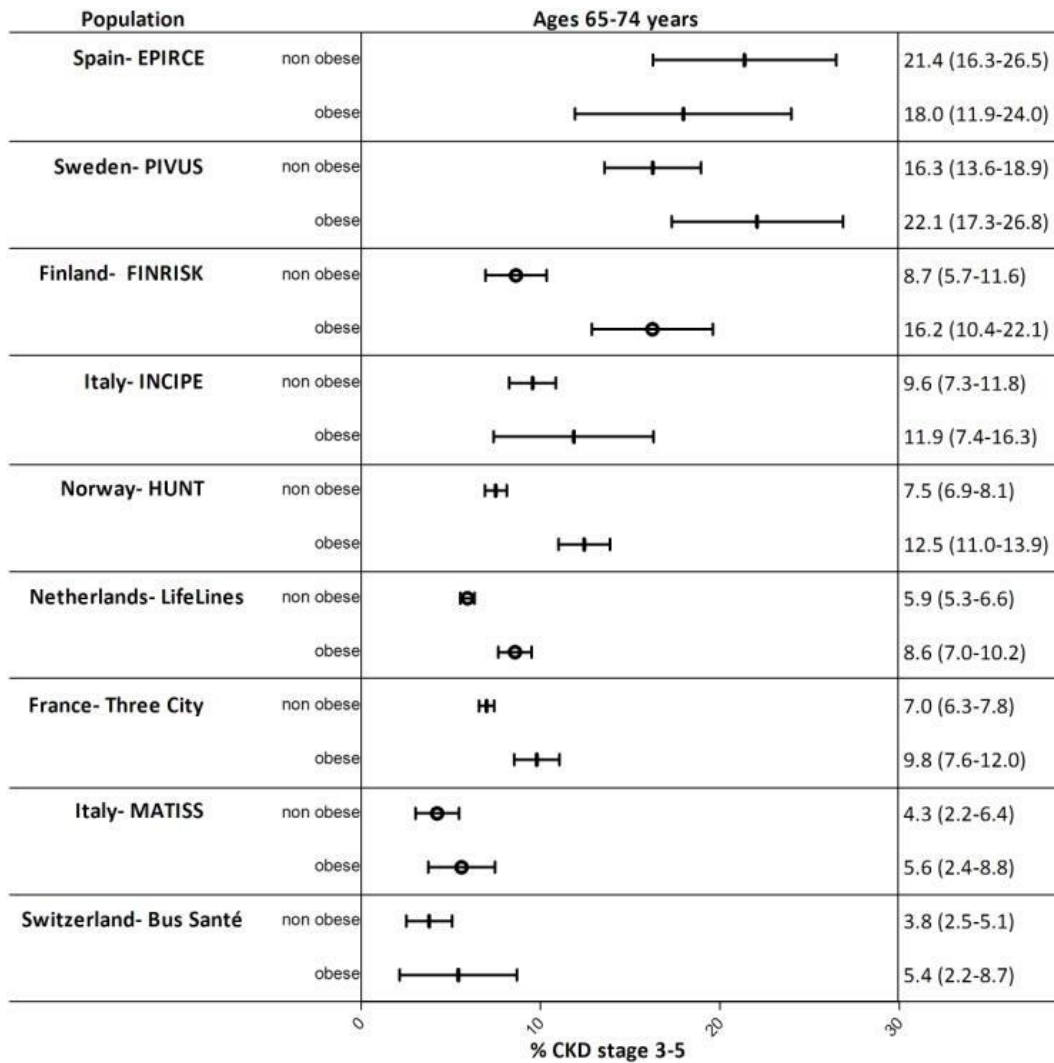

⊖ studies using enzymatic method, | studies using Jaffe method.

Figure 4.3: CKD stage 3-5 prevalence (95%CI) in age group 65-74 years, in studies using non IDMS traceable creatinine.

a: overall population

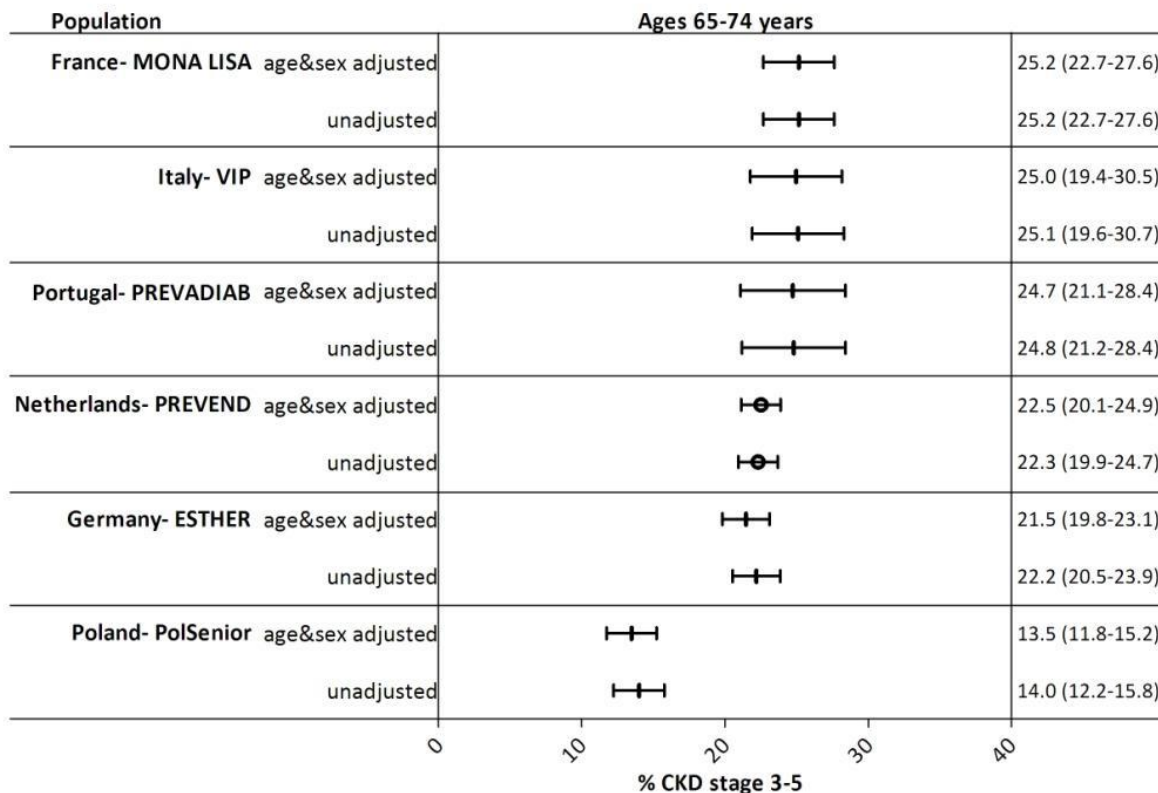

b: by diabetic status

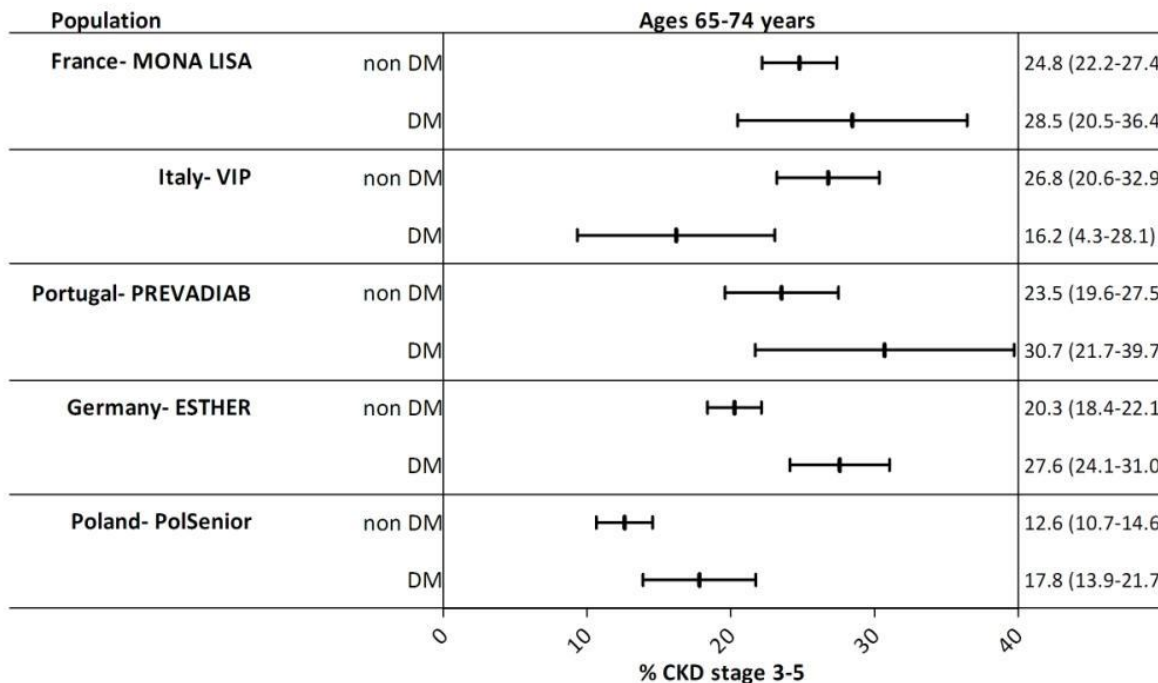

Adjusted prevalence was age and sex adjusted to the EU27 population 2005.  $\ominus$  studies using enzymatic method, | studies using Jaffe method. DM = diabetes mellitus.

Figure 4.3: CKD stage 3-5 prevalence (95%CI) in age group 65-74 years, in studies using non IDMS traceable creatinine.

c: by hypertensive status

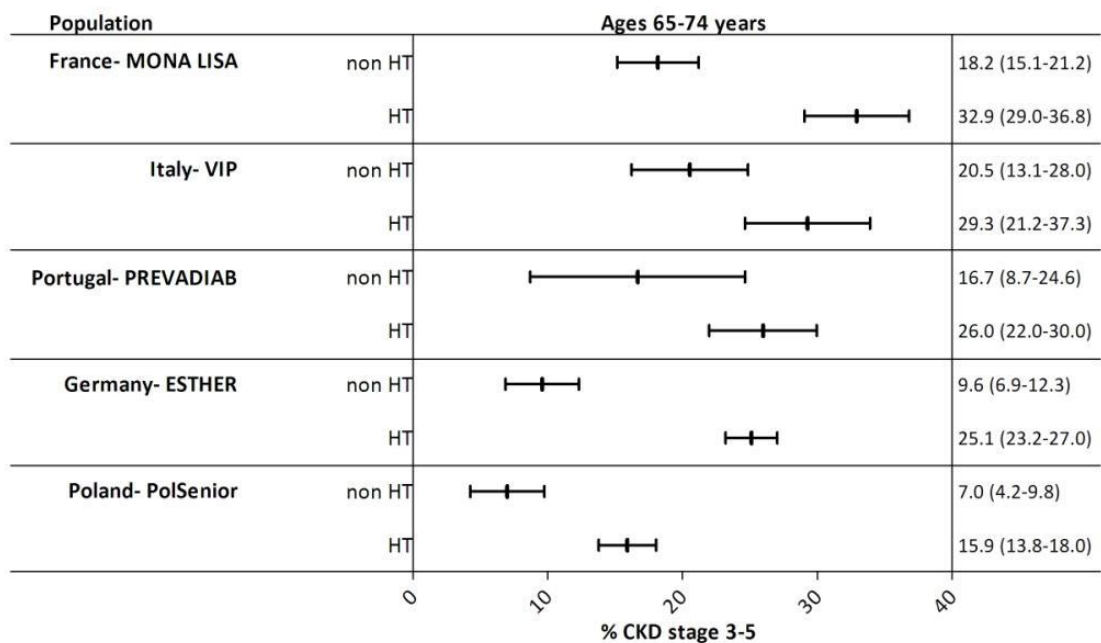

d: by obesity status

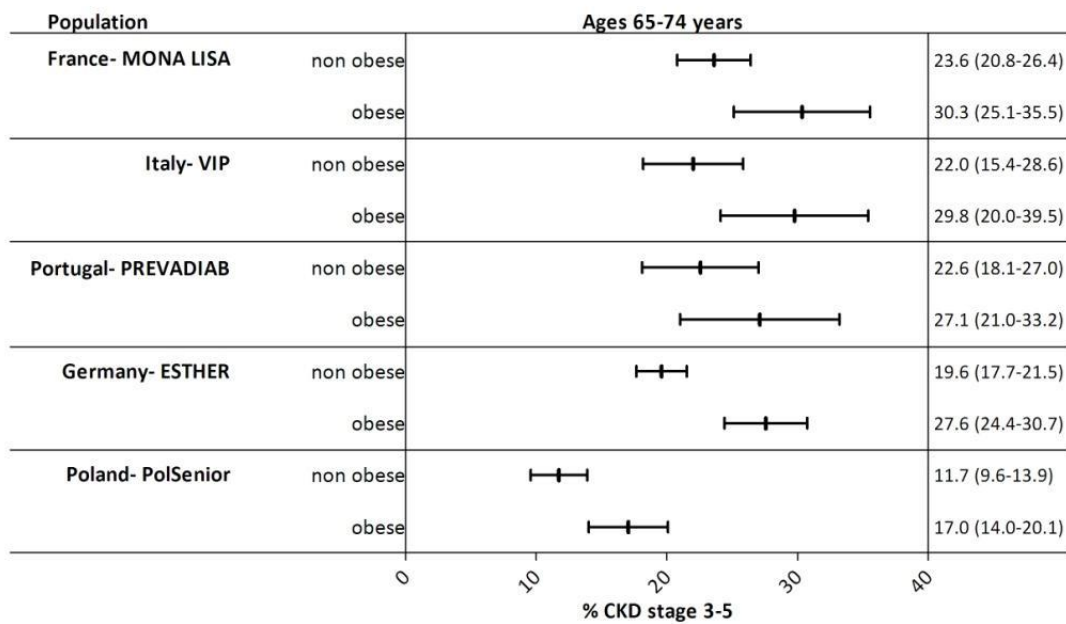

| studies using Jaffe method. HT= hypertension.

Figure 4.4: CKD stage 3-5 prevalence (95%CI) in age group 75-84 years, in studies using IDMS traceable creatinine.

a: overall population

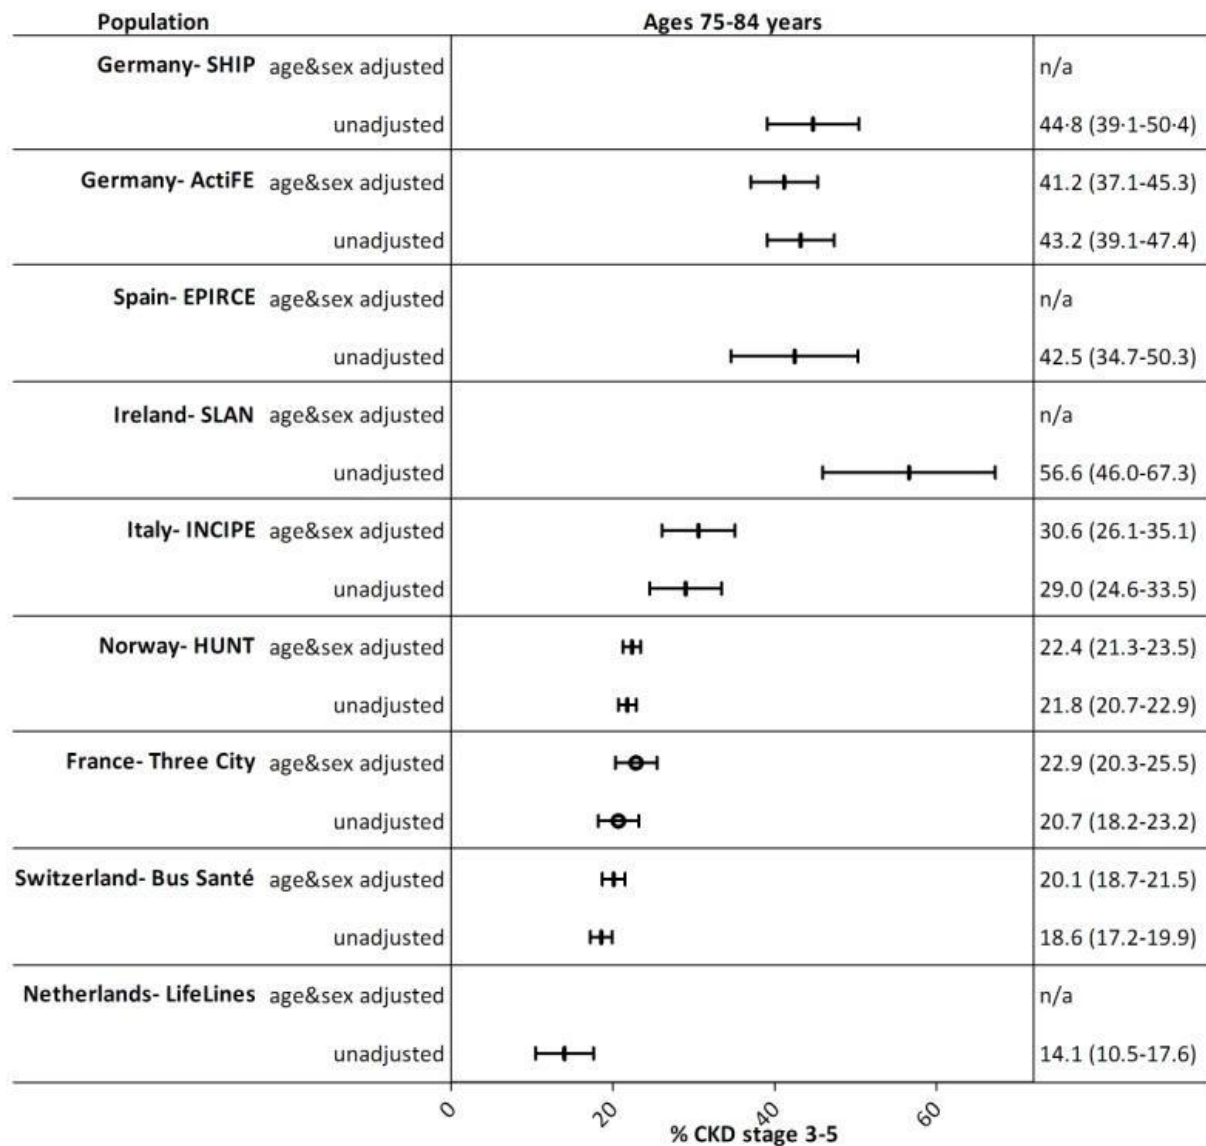

Adjusted prevalence was age and sex adjusted to the EU27 population 2005.  $\ominus$  studies using enzymatic method, | studies using Jaffe method. DM = diabetes mellitus.

Figure 4.4: CKD stage 3-5 prevalence (95%CI) in age group 75-84 years, in studies using IDMS traceable creatinine.

b: by diabetic status

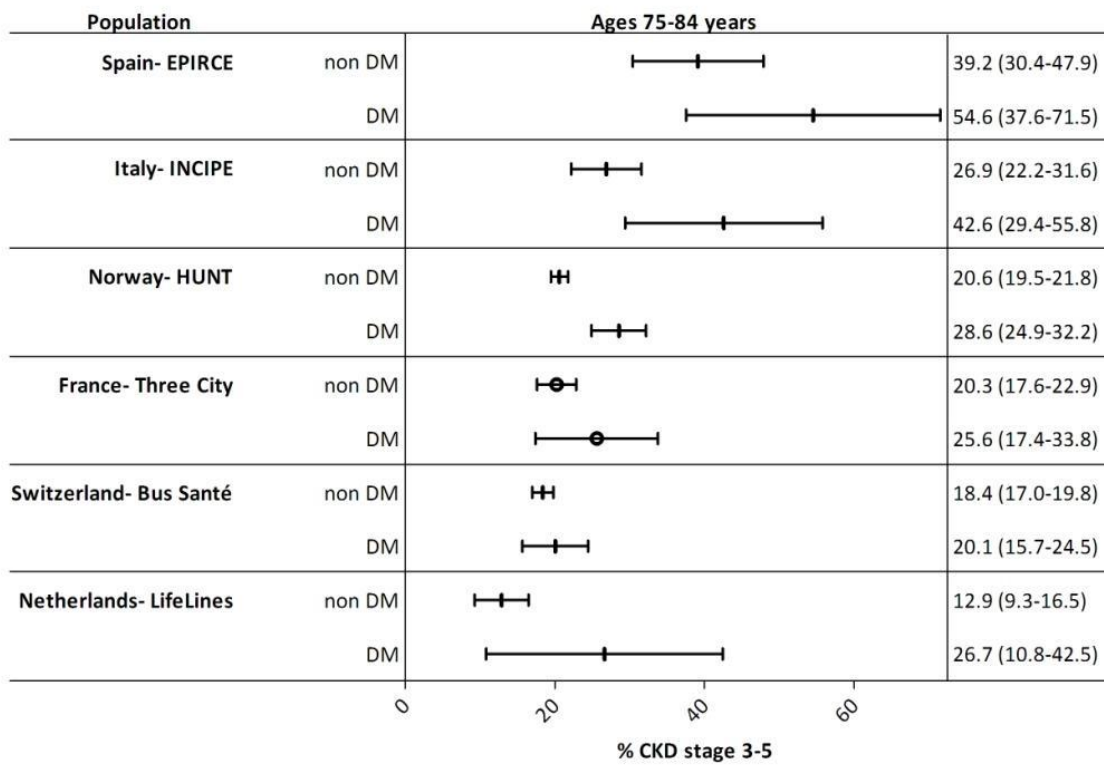

⊖ studies using enzymatic method, | studies using Jaffe method. DM = diabetes mellitus.



Figure 4.4: CKD stage 3-5 prevalence (95%CI) in age group 75-84 years, in studies using IDMS traceable creatinine.

c: by hypertensive status

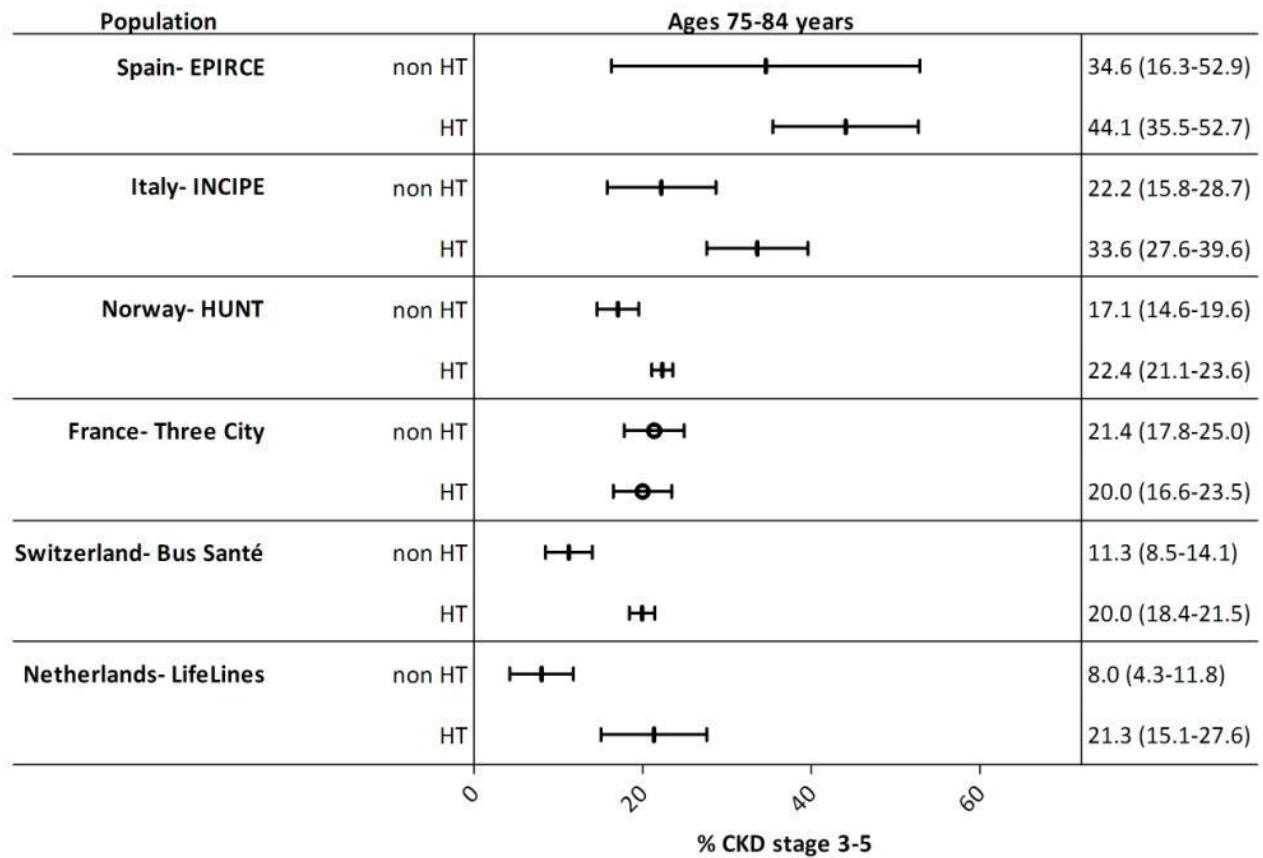

⊖ studies using enzymatic method, | studies using Jaffe method. HT= hypertension.

Figure 4.4: CKD stage 3-5 prevalence (95%CI) in age group 75-84 years, in studies using IDMS traceable creatinine.

d: by obesity status

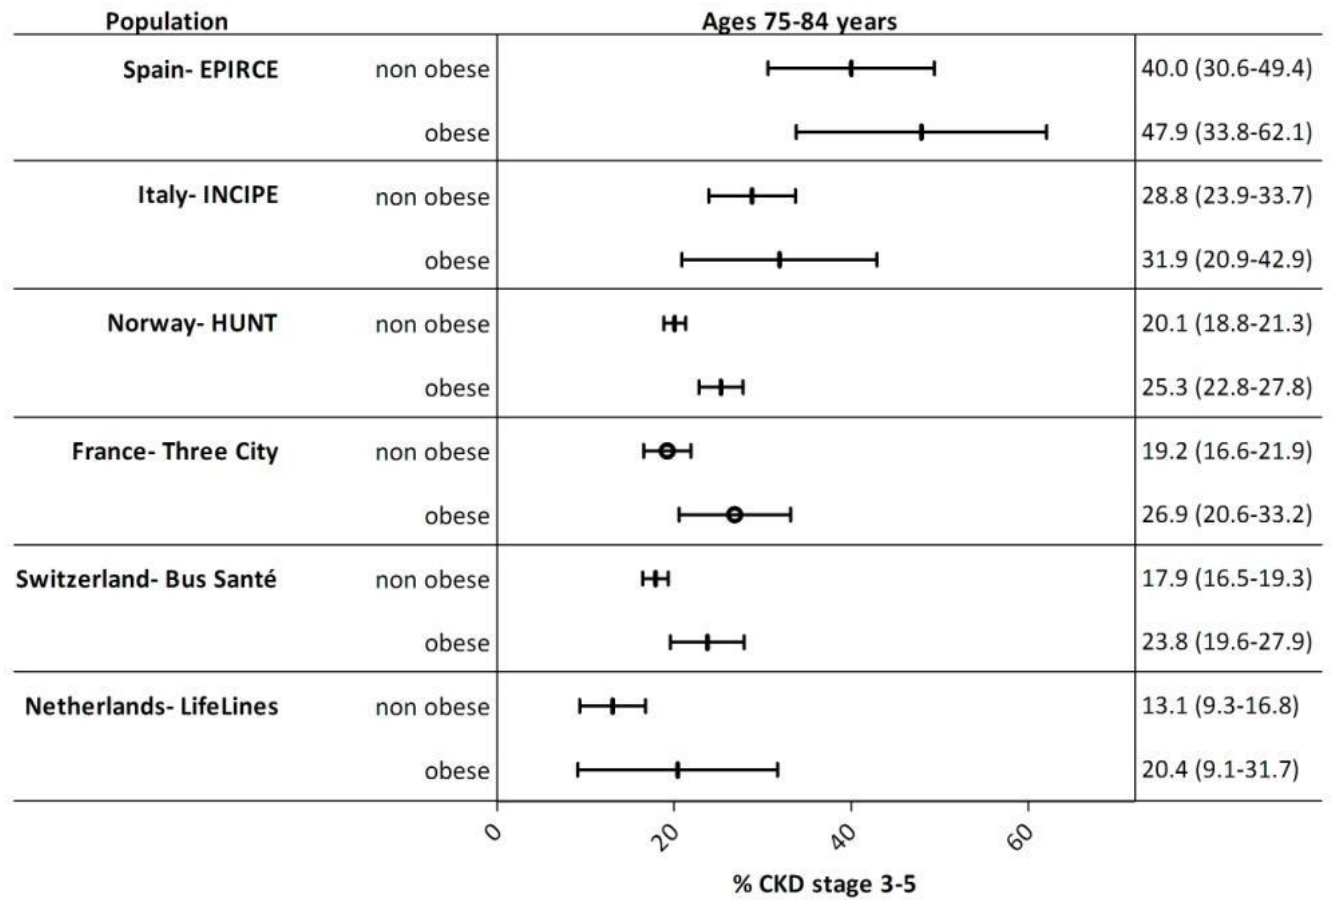

⊖ studies using enzymatic method, | studies using Jaffe method.

Figure 4.4: CKD stage 3-5 prevalence (95%CI) in age group 75-84 years, in studies using non IDMS traceable creatinine.

a: overall population

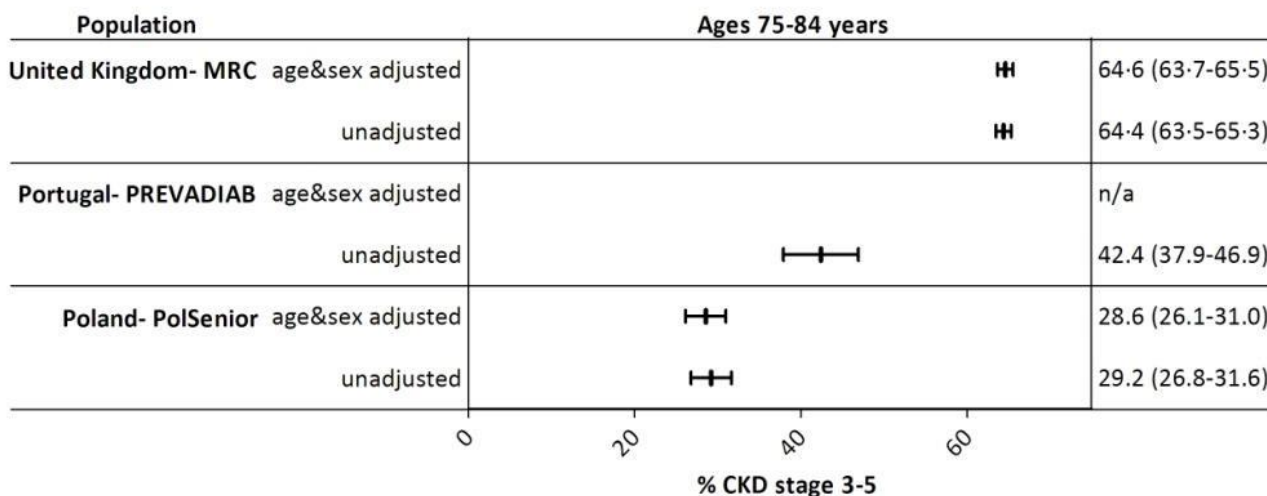

b: by diabetic status

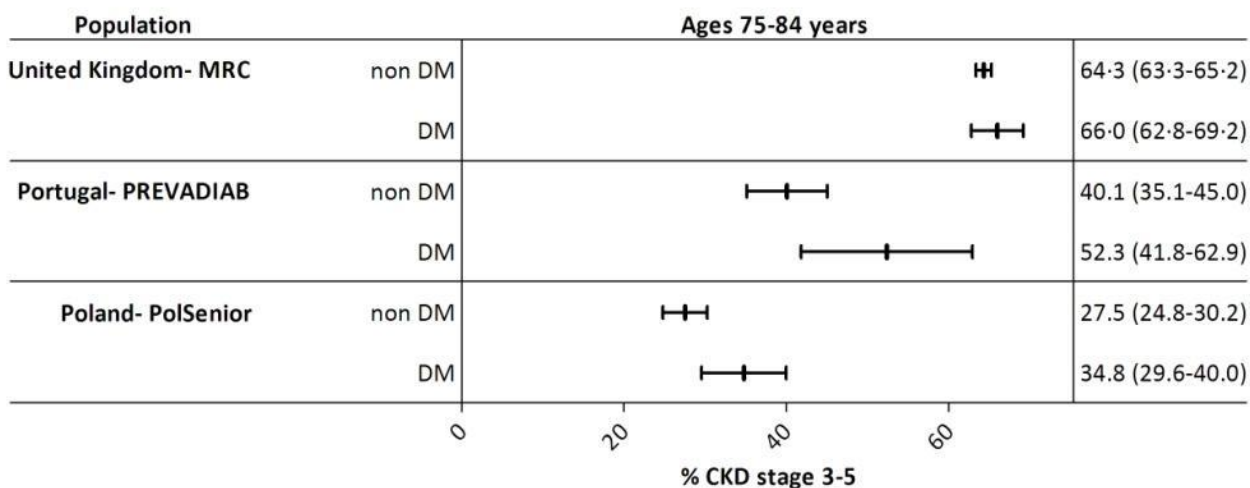

Adjusted prevalence was age and sex adjusted to the EU27 population of 2005. DM = diabetes mellitus. | studies using Jaffe method. MRC study results are comprised of a combination of enzymatic and Jaffe results, for investigators did not distinguish results by measurement method.

Figure 4.4: CKD stage 3-5 prevalence (95%CI) in age group 75-84 years, in studies using non IDMS traceable creatinine.

c: by hypertensive status

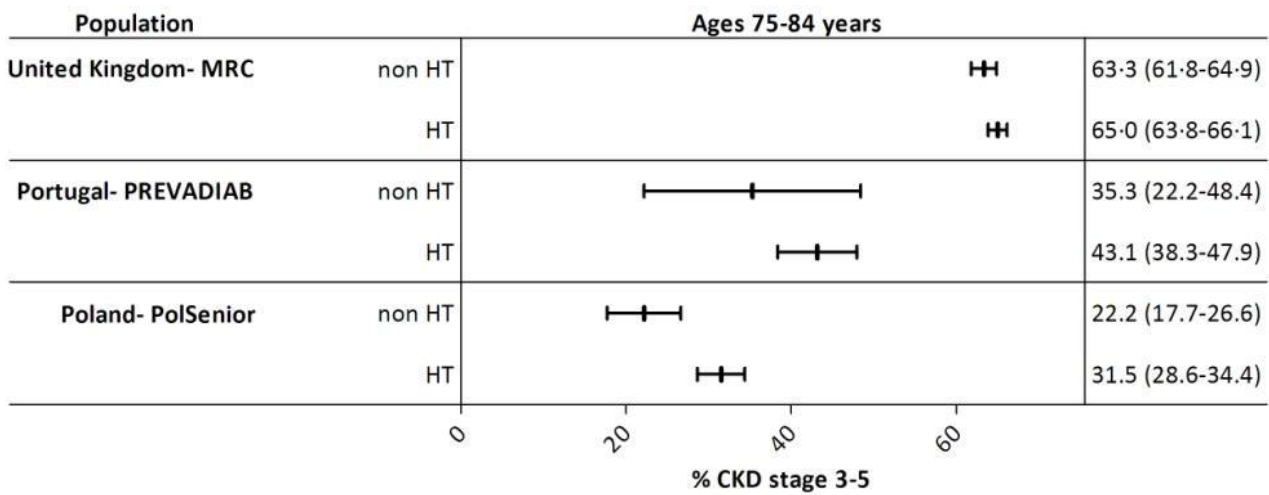

d: by obesity status

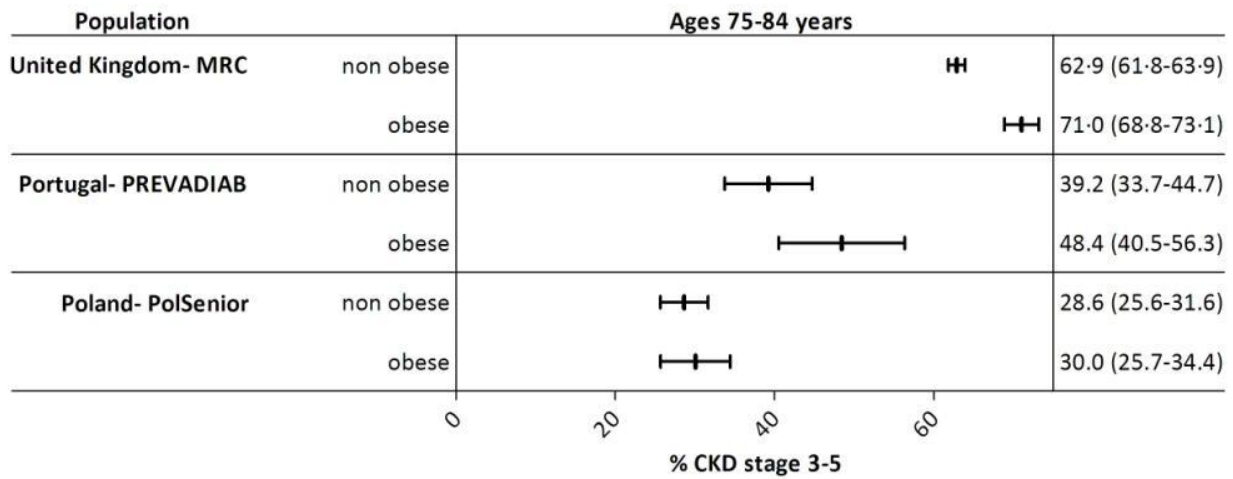

Adjusted prevalence was age and sex adjusted to the EU27 population of 2005. HT= hypertension. | studies using Jaffe method. MRC study results are comprised of a combination of enzymatic and Jaffe results, for investigators did not distinguish results by measurement method.

## **Appendix Tables**

**Table 1.1: Study population characteristics and laboratory methods of studies including participants aged 20 years and older.**

| Country                            | Germany        | Netherlands   |               | Norway          | Spain         | Finland       | Italy        |                        | Portugal    |
|------------------------------------|----------------|---------------|---------------|-----------------|---------------|---------------|--------------|------------------------|-------------|
| Study                              | SHIP           | LifeLines     | PREVEND       | HUNT            | EPIRCE        | FINRISK       | MATISS       | VIP                    | PREVADIAB   |
| Characteristics                    |                |               |               |                 |               |               |              |                        |             |
| Data on CKD stage                  | CKD stage 1-5  |               |               |                 |               | CKD stage 3-5 |              |                        |             |
| N study pop                        | 4308           | 94133         | 8534          | 65252           | 2746          | 4228          | 3780         | 1190                   | 5000        |
| Sample collection years            | 1997-2001      | 2007-2013     | 1997-1998     | 1995-1997       | 2004-2008     | 2007          | 1993-1996    | 1998-1999<br>2008-2009 | 2008        |
| Mean age, years (SD)               | 49.8(16.4)     | 44.6 (12.5)   | 48.6 (12.3)   | 50.3 (17.3)     | 49.3 (16.3)   | 49.7 (12.5)   | 49.2(14.1)   | 49.7 (14.2)            | 46.2 (18.3) |
| Females (%)                        | 50.9           | 58.7          | 54.6          | 53.22           | 58.2          | 54.3          | 48.8         | 49.9                   | 59.8        |
| Caucasian ethnicity (%)            | 100%           | n/a           | 96%           | 97%             | 99%           | 99%           | n/a          | 100%                   | n/a         |
| DM (%)                             | 11.0           | 2.4           | 2.5           | 3.4             | 10.3          | 8.4           | 5.1          | 7.4                    | 7.6         |
| HT (%)                             | 52.5           | 18.2          | 27.8          | 43.7            | 41.2          | 43.3          | 15.6         | 34.7                   | 53.4        |
| Smokers (%)                        | 30.3           | 18.8          | 31.2          | 29.2            | 25.3          | 18.8          | 27.6         | 24.2                   | n/a         |
| mean SBP, mmHg (SD)                | 136 (21)       | 126 (15)      | 126 (19)      | 138 (22)        | 131 (22)      | 132 (19)      | 140 (23)     | 129 (19)               | 135 (26)    |
| mean DBP, mmHg (SD)                | 83 (11)        | 74 (9)        | 73 (9)        | 80 (12)         | 79 (12)       | 79 (11)       | 85 (13)      | 78 (10)                | 85 (34)     |
| Mean BMI (kg/m <sup>2</sup> ) (SD) | 27.3 (4.8)     | 26.1 (4.3)    | 26.1 (4.2)    | 26.4 (4.10)     | 27.5 (5.3)    | 27.1 (4.9)    | 27.7 (4.5)   | 28.3 (6.0)             | 27.6 (5.0)  |
| ARB use (%)                        | 1.7            | n/a           | n/a           | n/a             | 5.0           | n/a           | n/a          | 1.8                    | n/a         |
| ACEi use (%)                       | 12.8           | n/a           | n/a           | n/a             | 6.4           | n/a           | n/a          | 3.5                    | n/a         |
| ACEi/ARB use (%)                   | n/a            | n/a           | 4.4           | n/a             | n/a           | n/a           | n/a          | n/a                    | n/a         |
| Creatinine method                  | Jaffe          | enzymatic     | enzymatic     | Jaffe           | Jaffe         | enzymatic     | enzymatic    | Jaffe                  | Jaffe       |
| IDMS traceable creatinine?         | yes            | yes           | no            | yes             | yes           | yes           | yes          | no                     | no          |
| Albuminuria method                 | immunoassay    | immunoassay   | immunoassay   | immunoassay     | immunoassay   | n/a           | n/a          | n/a                    | n/a         |
| Mean eGFR by CKD-EPI (SD)          | 82.2 (17.0)    | 96.5 (15.0)   | 83.6 (14.9)   | 97.6 (19.5)     | 86.6 (18.0)   | 89.5 (15.0)   | 100.4 (14.8) | 83.7 (16.3)            | 85.0 (18.2) |
| Mean eGFR by MDRD (SD)             | 79.4 (15.1)    | 93.4 (17.1)   | 80.1 (13.8)   | 100.1 (24.2)    | 84.1 (17.7)   | 86.9 (15.0)   | 103.4 (19.7) | 80.5 (14.5)            | 81.5 (16.3) |
| Median ACR mg/g (25p-75p)          | 8.4 (5.1-17.3) | 2.2 (1.3-4.2) | 5.5 (4.1-8.3) | 10.3 (7.4-14.5) | 4.6 (2.5-8.6) | n/a           | n/a          | n/a                    | n/a         |

DM = diabetes mellitus, HT= hypertension, SBP= systolic blood pressure, DBP= diastolic blood pressure, BMI= body mass index, ARB = angiotensin receptor blockers, ACEi angiotensin converting enzyme inhibitors, ARB/ACEi = use of either ARB or ACEi, IDMS =isotope dilution mass spectrometry, eGFR= estimated glomerular filtration rate, uACR= urinary albumin-to-creatinine ratio.

**Table 1.2: Study population characteristics and laboratory methods of studies including participants aged 65 years and older (Part a).**

| Country                            | Finland     | France         |             | Germany        |             |                 | Ireland     | Italy           |             |                    |
|------------------------------------|-------------|----------------|-------------|----------------|-------------|-----------------|-------------|-----------------|-------------|--------------------|
| Study                              | FINRISK     | 3C             | MONALISA    | ActiFE         | ESTHER      | SHIP            | SLAN        | INCIPE          | MATISS      | VIP                |
| Characteristics                    |             |                |             |                |             |                 |             |                 |             |                    |
| age range                          | ages 65+    |                |             |                |             |                 |             |                 |             |                    |
| N study pop                        | 501         | 8705           | 1243        | 1506           | 3428        | 984             | 386         | 1301            | 626         | 235                |
| Sample collection years            | 2007        | 2004?          | 2006-2007   | 2009-2010      | 2000-2002   | 1997-2001       | 2006-2007   | 2006-2007       | 1993-1996   | 1998-99<br>2008-09 |
| Mean age, years (SD)               | 68.9 (2.7)  | 77.9(4.8)      | 70 (2.9)    | 75.7 (6.6)     | 72.4 (4.5)  | 71.6 (4.4)      | 71.4 (5.2)  | 72.8 (5.7)      | 69.9 (3.7)  | 69.4 (3.0)         |
| Females (%)                        | 49.9        | 63.4           | 49.6        | 43.4           | 53.4        | 44.5            | 50.3        | 52.3            | 49.7        | 49.8               |
| Caucasian ethnicity (%)            | 99%         | *              | *           | 100%           | n/a         | 100%            | 96%         | 100%            | n/a         | 100%               |
| DM (%)                             | 14.8        | 13.1           | 10.7        | 13.5           | 28.2        | 25.4            | 9.6         | 12.7            | 10.2        | 15.7               |
| HT (%)                             | 77.0        | 75.4           | 47.9        | 53.5           | 83.7        | 80.6            | 74.8        | 53.8            | 41.0        | 52.3               |
| Smokers (%)                        | n/a         | 5.5            | 5.9         | 9.3            | 6.0         | 10.9            | 13.2        | 8.1             | n/a         | 12.8               |
| mean SBP, mmHg (SD)                | 146 (22)    | 136 (20)       | 148 (21)    | 143 (12)       | 140 (19)    | 149 (21)        | 147 (21)    | 147 (19)        | 159 (25)    | 137 (24)           |
| mean DBP, mmHg (SD)                | 79 (11)     | 75 (11)        | 83 (10)     | 80 (11)        | 81 (9)      | 84 (12)         | 81 (16)     | 86 (10)         | 86 (13)     | 78 (11)            |
| Mean BMI (kg/m <sup>2</sup> ) (SD) | 28.3 (4.5)  | 26.0 (4.1)     | 27.8 (4.6)  | 27.6 (4.2)     | 28.3 (4.6)  | 28.6 (4.3)      | 27.8 (4.2)  | 27.2 (4.4)      | 29.0 (4.6)  | 29.4 (4.8)         |
| ARB use (%)                        | n/a         | 16.5           | 22.7        | 14.7           | 21.1        | 3.6             | n/a         | n/a             | n/a         | 2.6                |
| ACEi use (%)                       | n/a         | 14.8           | 12.6        | 19.0           | 32.84       | 31.6            | n/a         | n/a             | n/a         | 6.0                |
| ACEi/ARB use (%)                   | n/a         | n/a            | n/a         | n/a            | n/a         | n/a             | n/a         | n/a             | n/a         | n/a                |
| Creatinine method                  | enzymatic   | Jaffe          | Jaffe       | Jaffe          | Jaffe       | Jaffe           | Jaffe       | Jaffe           | enzymatic   | Jaffe              |
| IDMS traceable creatinine?         | Yes         | yes            | no          | yes            | no          | yes             | yes         | yes             | yes         | no                 |
| Albuminuria method                 | n/a         | immunoassay    | n/a         | immunoassay    | n/a         | immunoassay     | immunoassay | immunoassay     | n/a         | n/a                |
| Mean eGFR by CKD-EPI (SD)          | 75.4 (12.7) | 71.2 (14.2)    | 67.4 (11.9) | 65.4 (15)      | 67.9 (14.1) | 66.3 (12.9)     | 69.6 (16.4) | 74.2 (15.2)     | 84.0 (12.6) | 68.5 (12.5)        |
| Mean eGFR by MDRD (SD)             | 78.0 (14.4) | 77.1 (17.2)    | 69.4 (12.4) | 69.2 (16)      | 71 (15.2)   | 69.0 (13.5)     | 73.3 (19.2) | 79.6 (19.6)     | 92.5 (20.1) | 70.2 (12.5)        |
| Median ACR mg/g (25p-75p)          | n/a         | 5.5 (2.6-11.4) | n/a         | 5.9 (3.9-11.9) | n/a         | 13.8 (7.5-32.3) | 12.8 (6.7)  | only dipstick + | n/a         | n/a                |

\*National legislation prohibiting collection of ethnicity data. <sup>1</sup>uACR data based on subgroup population N=1258. Albuminuria was collected 4 years after baseline in a random sample from 1 city. DM = diabetes mellitus, HT= hypertension, BMI= body mass index, ARB = angiotensin receptor blockers, ACEi angiotensin converting enzyme inhibitors, ARB/ACEi = use of either ARB or ACEi, IDMS =isotope dilution mass spectrometry, eGFR= estimated glomerular filtration rate, uACR= urinary albumin-to-creatinine ratio.

**Table 1.2: Study population characteristics and laboratory methods of studies including participants aged 65 years and older (Part b).**

| Country                            | Netherlands     |                | Norway           | Poland         | Portugal    | Spain          | Sweden      | Switzerland | United Kingdom |
|------------------------------------|-----------------|----------------|------------------|----------------|-------------|----------------|-------------|-------------|----------------|
| Study                              | LifeLines       | PREVEND        | HUNT             | PolSenior      | PREVADIAB   | EPIRCE         | PIVUS       | Bus Santé   | MRC            |
| <b>Characteristics</b>             |                 |                |                  |                |             |                |             |             |                |
| <b>age range</b>                   | <b>ages 65+</b> |                |                  |                |             |                |             |             |                |
| N study pop                        | 6983            | 1207           | 15658            | 4150           | 1016        | 578            | 1016        | 1435        | 13179          |
| Sample collection years            | 2007-2013       | 1997-1998      | 1995-1997        | 2008-2011      | 2008        | 2004-2008      | 2001-2004   | 2005-2008   | 1994-1999      |
| Mean age, years (SD)               | 69.9 (4.6)      | 69.1 (3.0)     | 74.3 (6.3)       | 79.0 (8.6)     | 73.1 (4.9)  | 72.5 (5.4)     | 70.2 (0.2)  | 71.6 (4.9)  | 81.2(4.7)      |
| Females (%)                        | 54.1            | 52.1           | 54.9             | 47.8           | 66.5        | 58.0           | 50.1        | 46.3        | 61.14          |
| Caucasian ethnicity (%)            | n/a             | 96%            | 97%              | 100%           | n/a         | 99%            | 100%        | n/a         | n/a            |
| DM (%)                             | 8.6             | 6.9            | 8.9              | 23.0           | 18.6        | 24.4           | 11.7        | 7.3         | 7.9            |
| HT (%)                             | 44.5            | 64.6           | 79.4             | 73.2           | 86.6        | 79.0           | 72.1        | 40.3        | 63.5           |
| Smokers (%)                        | 7.4             | n/a            | 19.6             | 9.5            | n/a         | 6.8            | 10.5        | 8.3         | 11.5           |
| mean SBP, mmHg (SD)                | 138 (18)        | 143 (21)       | 156 (24)         | 145 (22)       | 156 (26)    | 149 (22)       | 150 (23)    | 138 (21)    | 149 (22)       |
| mean DBP, mmHg (SD)                | 76 (9)          | 77 (9)         | 85 (13)          | 83 (11)        | 89 (34)     | 81 (11)        | 79 (10)     | 76 (10)     | 74 (13)        |
| Mean BMI (kg/m <sup>2</sup> ) (SD) | 27.2 (3.9)      | 27.1 (3.8)     | 27.2 (4.2)       | 28.1 (5.1)     | 28.8 (4.6)  | 29.2 (5.1)     | 26.7 (4.36) | 26.2 (4.1)  | 26.1 (4.18)    |
| ARB use (%)                        | n/a             | n/a            | n/a              | 7.1            | n/a         | 14.7           | 8.27        | n/a         | n/a            |
| ACEi use (%)                       | n/a             | n/a            | n/a              | 40.9           | n/a         | 14.7           | 8.46        | n/a         | n/a            |
| ACEi/ARB use (%)                   | n/a             | 10.7           | n/a              | n/a            | n/a         | n/a            | n/a         | n/a         | 9.16           |
| Creatinine method                  | enzymatic       | enzymatic      | Jaffe            | Jaffe          | Jaffe       | Jaffe          | Jaffe       | Jaffe       | both           |
| IDMS traceable creatinine?         | yes             | no             | yes              | no             | no          | yes            | yes         | yes         | both           |
| Albuminuria method                 | immunoassay     | immunoassay    | immunoassay      | immunoassay    | n/a         | immunoassay    | n/a         | n/a         | dipstick       |
| Mean eGFR by CKD-EPI (SD)          | 77.7 (12.6)     | 69.4 (12.3)    | 76.3 (15.3)      | 68.8 (17.5)    | 65.3 (14.1) | 68.9 (15.5)    | 75.5 (14.9) | 79.1 (11.7) | 53.8 (14.3)    |
| Mean eGFR by MDRD (SD)             | 81.5 (15.8)     | 71.3 (13.2)    | 83.5 (21.9)      | 76.0 (22.2)    | 68.0 (14.8) | 72.1 (17.1)    | 81.0 (20.6) | 83.9 (14.8) | 59.0 (38.8)    |
| Median ACR mg/g (25p-75p)          | 2.6 (1.4-5.3)   | 7.5 (5.4-13.3) | 15.4 (10.7-21.6) | 5.1 (2.0-16.6) | n/a         | 7.0 (3.0-13.4) | n/a         | n/a         | n/a            |

DM = diabetes mellitus, HT= hypertension, BMI= body mass index, ARB = angiotensin receptor blockers, ACEi angiotensin converting enzyme inhibitors, ARB/ACEi = use of either ARB or ACEi, IDMS =isotope dilution mass spectrometry, eGFR= estimated glomerular filtration rate, uACR= urinary albumin-to-creatinine ratio.



Table 2: Adjusted and unadjusted prevalence of CKD stage 1-5, CKD stage 3-5 and albuminuria >30mg/g in in the population aged 20-74 years.

| Country                     | Finland       | Germany          | Italy         |               | Netherlands   |               | Norway        | Portugal      | Spain           |
|-----------------------------|---------------|------------------|---------------|---------------|---------------|---------------|---------------|---------------|-----------------|
| Study                       | *FINRISK      | *SHIP            | *MATISS       | VIP           | *LIFELINES    | PREVEND       | *HUNT         | PREVADIAB     | *EPIRCE         |
| Characteristics             |               |                  |               |               |               |               |               |               |                 |
| Age range                   | ages 20+      |                  |               |               |               |               |               |               |                 |
| % CKD 1-5 (95%CI), Crude    | n/a           | 19.4 (18.1-20.7) | n/a           | n/a           | 3.9 (3.7-4.1) | 8.9 (8.3-9.5) | 3.7 (3.5-3.9) | n/a           | 10.7 (9.4-12.0) |
| % CKD 1-5 (95%CI), Adjusted | n/a           | 17.3 (16.5-18.1) | n/a           | n/a           | 4.8 (4.8-4.8) | 8.3 (8.1-8.5) | 3.3 (3.3-3.3) | n/a           | 9.8 (9.0-10.6)  |
| N of missings (%)           | n/a           | 514 (11.9%)      | n/a           | n/a           | 45766 (48.4%) | 96 (1.1%)     | 0             | n/a           | 471 (17.1%)     |
| % CKD 3-5 (95%CI), Crude    | 2.6 (2.1-3.1) | 7.4 (6.5-8.2)    | 1.2 (0.8-1.5) | 6.8 (5.4-8.2) | 0.8 (0.8-0.9) | 5.3 (4.8-5.8) | 1.9 (1.8-2.0) | 5.2 (4.6-5.9) | 4.7 (3.9-5.5)   |
| % CKD 3-5 (95%CI), Adjusted | 2.4 (2.0-2.9) | 5.9 (5.2-6.6)    | 1.0 (0.7-1.3) | 4.9 (3.6-6.1) | 1.3 (1.2-1.4) | 4.8 (4.4-5.3) | 1.7 (1.6-1.8) | 5.3 (4.6-5.9) | 4.0 (3.2-4.8)   |
| N of missings (%)           | 0             | 21 (0.5%)        | 57 (1.5%)     | 0             | 383 (0.4%)    | 58 (0.7%)     | 0             | 0             | 0               |

Adjusted prevalence estimates are age and sex adjusted to the EU27 population of 2005 for the age range 20-74 years. \*studies using IDMS traceable creatinine  
 Studies not covering the entire age range are not included in this table.

Table 3: Diabetic population: ages 20 years and older (part a)

| Country                                  | Finland     | Germany         | Italy        |             | Netherlands     |               | Norway          | Portugal    | Spain          |
|------------------------------------------|-------------|-----------------|--------------|-------------|-----------------|---------------|-----------------|-------------|----------------|
|                                          | Study       |                 |              |             |                 |               |                 |             |                |
| Characteristics                          | FINRISK     | SHIP            | MATISS       | VIP         | PREVEND         | LifeLines     | HUNT            | PREVADIAB   | EPIRCE         |
| Age range                                | ages 20+    |                 |              |             |                 |               |                 |             |                |
| N study pop                              | 354         | 471             | 192          | 88          | 211             | 2 238         | 2 192           | 375         | 282            |
| Mean age, years (SD)                     | 55.7 (11.1) | 63.7 (11.3)     | 59.1 (10.3)  | 61.6 (9.5)  | 60.8 (9.3)      | 55.6 (12.3)   | 66.0 (14.4)     | 60.7 (16.6) | 63.0 (11.4)    |
| Females (%)                              | 56.2        | 43.1            | 47.9         | 46.6        | 53.5            | 53.9          | 50.7            | 54.9        | 50,0           |
| HT (%)                                   | 62.1        | 84.1            | 36.5         | 52.3        | 71.0            | 33.3          | 79.11           | 83.8        | 74.1           |
| Smokers (%)                              | n/a         | 16.8            | 18.2         | 18.2        | n/a             | 15.1          | 19.4            | n/a         | 14.0           |
| mean Systolic Blood pressure, mmHg (SD)  | 138 (21)    | 150 (20)        | 157 (25)     | 138 (21)    | 143 (21)        | 133 (17)      | 154 (25)        | 154 (26)    | 146 (22)       |
| mean Diastolic Blood pressure, mmHg (SD) | 80 (11)     | 84 (12)         | 89 (13)      | 81 (10)     | 78 (10)         | 75 (9)        | 85 (14)         | 90 (33)     | 82 (11)        |
| Mean BMI (kg/m <sup>2</sup> ) (SD)       | 30.4 (5.8)  | 30.1 (5.0)      | 30.4 (5.1)   | 31.1 (5.1)  | 29.2 (5.2)      | 30.0 (5.5)    | 29.0 (4.9)      | 30.5 (5.2)  | 30.7 (5.3)     |
| ARB use (%)                              | n/a         | 4.9             | n/a          | 1.1         | n/a             | n/a           | n/a             | n/a         | 13.8           |
| ACEi use (%)                             | n/a         | 36.7            | n/a          | 5.7         | n/a             | n/a           | n/a             | n/a         | 18.1           |
| ACEi/ARB use (%)                         | n/a         | n/a             | n/a          | n/a         | n/a             | n/a           | n/a             | n/a         | n/a            |
| Mean eGFR by CKD-EPI (SD)                | 86.1 (16.4) | 73.2 (17.3)     | 94.3 (16.7)  | 75.2 (13.5) | 78.5 (15.7)     | 91.0 (17.0)   | 82.5 (20.4)     | 75.6 (21.1) | 77.9 (17.7)    |
| Mean eGFR by MDRD (SD)                   | 85.8 (17.8) | 74.1 (17.0)     | 104.5 (27.6) | 74.6 (11.9) | 78.6 (16.1)     | 93.1 (21.1)   | 87.9 (24.3)     | 75.6 (19.7) | 79.2 (18.7)    |
| Median ACR mg/g (25p-75p)                | n/a         | 16.7 (8.3-42.5) | n/a          | n/a         | 10.6 (6.2-20.2) | 3.1 (1.5-8.0) | 15.6 (7.1-33.9) | n/a         | 7.0 (2.9-14.9) |

HT= hypertension, BMI= body mass index, ARB = angiotensin receptor blockers, ACEi angiotensin converting enzyme inhibitors, ARB/ACEi = use of either ARB or ACEi, eGFR= estimated glomerular filtration rate, ACR= urinary albumin-to-creatinine ratio.

Table 3: Diabetic population: ages 45 years and older (part b)

| Country                                  | France      | Ireland         | Italy               | Switzerland |
|------------------------------------------|-------------|-----------------|---------------------|-------------|
| Study                                    |             |                 |                     |             |
| Characteristics                          | MONALISA    | SLAN            | INCIPE              | BusSanté    |
| Age range                                | ages 45+    |                 |                     |             |
| N study pop                              | 267         | 89              | 287                 | 200         |
| Mean age, years (SD)                     | 63.7 (8.2)  | 62.8 (10.2)     | 66.6 (9.3)          | 64.0 (10.3) |
| Females (%)                              | 35.6        | 37.1            | 38.7                | 26.0        |
| HT (%)                                   | 59.2        | 80.7            | 67.6                | 60.0        |
| Smokers (%)                              | 11.2        | 20.2            | 12.9                | 10.0        |
| mean Systolic Blood pressure, mmHg (SD)  | 150 (22)    | 147 (20)        | 147 (20)            | 136 (25)    |
| mean Diastolic Blood pressure, mmHg (SD) | 84 (10)     | 81 (11)         | 86 (10)             | 78 (11)     |
| Mean BMI (kg/m <sup>2</sup> ) (SD)       | 31.3 (6.1)  | 30.2 (4.9)      | 29.6 (5.6)          | 28.7 (5.0)  |
| ARB use (%)                              | 34.8        | n/a             | n/a                 | n/a         |
| ACEi use (%)                             | 23.2        | n/a             | n/a                 | n/a         |
| ACEi/ARB use (%)                         | n/a         | n/a             | n/a                 | n/a         |
| Mean eGFR by CKD-EPI (SD)                | 72.4 (15.0) | 75.4 (20.1)     | 78.1 (17.3)         | 84.0 (14.9) |
| Mean eGFR by MDRD (SD)                   | 73.2 (14.9) | 76.3 (20.1)     | 81.7 (20.1)         | 87.4 (17.0) |
| Median ACR mg/g (25p-75p)                | n/a         | 12.8 (6.4-25.8) | only for dipstick + | n/a         |

HT= hypertension, BMI= body mass index, ARB = angiotensin receptor blockers, ACEi angiotensin converting enzyme inhibitors, ARB/ACEi = use of either ARB or ACEi, eGFR= estimated glomerular filtration rate, ACR= urinary albumin-to-creatinine ratio.

Table 3: Diabetic population: ages 65 years and older (part c)

| Country                                  | France           | Germany        |             | Poland         | Sweden      | UK          |
|------------------------------------------|------------------|----------------|-------------|----------------|-------------|-------------|
|                                          | Study            |                |             |                |             |             |
| Characteristics                          | Three City       | ActiFE         | ESTHER      | PolSenior      | PIVUS       | MRC         |
| Age range                                | <b>ages 65+</b>  |                |             |                |             |             |
| N study pop                              | 839              | 204            | 1 237       | 1 039          | 119         | 1 042       |
| Mean age, years (SD)                     | 74.6 (5.4)       | 76.7 (6.6)     | 70.5 (6.3)  | 76.2 (10.1)    | 70.1 (0.1)  | 80.9 (4.6)  |
| Females (%)                              | 49.7             | 34.3           | 48.4        | 50.2           | 42.0        | 52.5        |
| HT (%)                                   | 90.2             | 76.5           | 91.9        | 80.4           | 83.2        | 65.0        |
| Smokers (%)                              | 6.0              | 13.7           | 9.2         | 10.8           | 10.9        | 9.4         |
| mean Systolic Blood pressure, mmHg (SD)  | 153 (22)         | 144 (12)       | 140 (20)    | 147 (22)       | 155 (24)    | 149 (22)    |
| mean Diastolic Blood pressure, mmHg (SD) | 83 (12)          | 80 (12)        | 79 (10)     | 84 (11)        | 80 (12)     | 73 (12)     |
| Mean BMI (kg/m <sup>2</sup> ) (SD)       | 27.6 (4.3)       | 29.2 (4.6)     | 30.6 (5.5)  | 30.3 (5.4)     | 28.7 (4.9)  | 27.2 (4.5)  |
| ARB use (%)                              | 11.2             | 18.5           | 28.7        | 10.5           | 21.9        | n/a         |
| ACEi use (%)                             | 28.0             | 22.5           | 42.6        | 51.3           | 21.0        | n/a         |
| ACEi/ARB use (%)                         | n/a              | n/a            | n/a         | n/a            | n/a         | 17.6        |
| Mean eGFR by CKD-EPI (SD)                | 76.5 (14.3)      | 62.0 (16.4)    | 68.2 (15.9) | 69.2 (19.6)    | 74.2 (15.4) | 53.4 (15.0) |
| Mean eGFR by MDRD (SD)                   | 83.7 (19.5)      | 66.3 (17.4)    | 70.9 (17.1) | 75.4 (23.7)    | 78.9 (19.3) | 58.1 (16.4) |
| Median ACR mg/g (25p-75p)                | 10.4 (5.2-31.6)* | 8.0 (4.7-26.8) | n/a         | 6.3 (2.3-24.2) | n/a         | n/a         |

HT= hypertension, BMI= body mass index, ARB = angiotensin receptor blockers, ACEi angiotensin converting enzyme inhibitors, ARB/ACEi = use of either ARB or ACEi, eGFR= estimated glomerular filtration rate, ACR= urinary albumin-to-creatinine ratio.

Table 4: Hypertensive population: ages 20 years and older (part a)

| Country                                  | Finland     | Germany        | Italy       |             | Netherlands    |               | Norway          | Portugal    | Spain          |
|------------------------------------------|-------------|----------------|-------------|-------------|----------------|---------------|-----------------|-------------|----------------|
|                                          | Study       |                |             |             |                |               |                 |             |                |
| Characteristics                          | FINRISK     | SHIP           | MATISS      | VIP         | PREVEND        | LifeLines     | HUNT            | PREVADIAB   | EPIRCE         |
| Age range                                | ages 20+    |                |             |             |                |               |                 |             |                |
| N study pop                              | 1 832       | 2 252          | 590         | 413         | 2 389          | 17 168        | 28 301          | 2 672       | 1 128          |
| Mean age, years (SD)                     | 55.7 (10.8) | 56.9 (14.2)    | 61.7 (9.7)  | 55.8 (12.7) | 57.2 (11.5)    | 51.5 (12.6)   | 59.7 (15.8)     | 53.9 (17.8) | 59.5 (14.1)    |
| Females (%)                              | 46.3        | 40.8           | 66.1        | 47.9        | 48.2           | 42.6          | 48.5            | 58.2        | 50.3           |
| DM (%)                                   | 12.0        | 17.7           | 11.9        | 11.1        | 6.3            | 4.4           | 6.1             | 11.8        | 18.6           |
| Smokers (%)                              | n/a         | 23.0           | 12.2        | 18.2        | n/a            | 17.0          | 24.4            | n/a         | 15.8           |
| mean Systolic Blood pressure, mmHg (SD)  | 146 (17)    | 151 (18)       | 164 (24)    | 147 (17)    | 146 (18)       | 149 (11)      | 156 (19)        | 151 (24)    | 151 (18)       |
| mean Diastolic Blood pressure, mmHg (SD) | 85 (11)     | 90 (11)        | 94 (14)     | 85 (9)      | 80 (9)         | 84 (9)        | 89 (12)         | 94 (44)     | 87 (11)        |
| Mean BMI (kg/m <sup>2</sup> ) (SD)       | 28.8 (5.2)  | 29.0 (4.6)     | 30.5 (4.6)  | 29.7 (7.6)  | 27.9 (4.3)     | 27.9 (4.5)    | 27.6 (4.2)      | 29.0 (5.0)  | 29.5 (5.2)     |
| ARB use (%)                              | n/a         | 3.2            | n/a         | 5.3         | n/a            | n/a           | n/a             | n/a         | 12.1           |
| ACEi use (%)                             | n/a         | 22.4           | n/a         | 9.9         | n/a            | n/a           | n/a             | n/a         | 15.4           |
| ACEi/ARB use (%)                         | n/a         | n/a            | n/a         | n/a         | n/a            | n/a           | n/a             | n/a         | n/a            |
| Mean eGFR by CKD-EPI (SD)                | 85.7 (15.1) | 77.8 (16.8)    | 89.7 (15.3) | 80.0 (16.4) | 77.0 (15.4)    | 91.9 (15.1)   | 88.8 (19.0)     | 79.6 (18.6) | 79.2 (18.2)    |
| Mean eGFR by MDRD (SD)                   | 85.0 (16.0) | 76.8 (15.7)    | 95.7 (22.0) | 78.6 (15.5) | 75.8 (14.7)    | 90.9 (17.3)   | 92.8 (23.3)     | 77.9 (16.7) | 79.4 (18.6)    |
| Median ACR mg/g (25p-75p)                | n/a         | 10.7 (6.9-3.7) | n/a         | n/a         | 6.9 (4.7-12.3) | 2.8 (1.5-5.8) | 13.3 (9.4-18.5) | n/a         | 5.7 (2.9-11.2) |

DM = diabetes mellitus, BMI= body mass index, ARB = angiotensin receptor blockers, ACEi angiotensin converting enzyme inhibitors, ARB/ACEi = use of either ARB or ACEi, eGFR= estimated glomerular filtration rate, ACR= urinary albumin-to-creatinine ratio.

Table 4: Hypertensive population: ages 45 years and older (part b)

| Country                                  | France      | Ireland         | Italy             | Switzerland |
|------------------------------------------|-------------|-----------------|-------------------|-------------|
| Study                                    |             |                 |                   |             |
| Characteristics                          | MONALISA    | SLAN            | INCIPE            | Bus Santé   |
| Age range                                | ages 45+    |                 |                   |             |
| N study pop                              | 1 134       | 659             | 1 389             | 1 094       |
| Mean age, years (SD)                     | 63.6 (8.5)  | 62.4 (9.8)      | 64.6 (10.5)       | 64.7 (9.9)  |
| Females (%)                              | 47.7        | 46.4            | 49.3              | 41.8        |
| DM (%)                                   | 13.9        | 10.8            | 14.0              | 11.0        |
| Smokers (%)                              | 7.4         | 15.6            | 12.1              | 9.7         |
| mean Systolic Blood pressure, mmHg (SD)  | 150 (20)    | 152 (18)        | 148 (19)          | 140 (21)    |
| mean Diastolic Blood pressure, mmHg (SD) | 86 (11)     | 86 (14)         | 89 (10)           | 80 (11)     |
| Mean BMI (kg/m <sup>2</sup> ) (SD)       | 29.4 (5.)   | 28.9 (4.5)      | 28.3 (6.6)        | 27.7 (4.0)  |
| ARB use (%)                              | 44.0        | n/a             | n/a               | n/a         |
| ACEi use (%)                             | 23.4        | n/a             | n/a               | n/a         |
| ACEi/ARB use (%)                         | n/a         | n/a             | n/a               | n/a         |
| Mean eGFR by CKD-EPI (SD)                | 69.9 (14.0) | 77.6 (17.9)     | 79.5 (16.9)       | 83.0 (14.8) |
| Mean eGFR by MDRD (SD)                   | 70.3 (13.3) | 78.9 (19.4)     | 82.7 (20.5)       | 85.9 (16.7) |
| Median ACR mg/g (25p-75p)                | n/a         | 11.3 (5.8-22.6) | 41.2 (17.4-125.0) | n/a         |

DM = diabetes mellitus, BMI= body mass index, ARB = angiotensin receptor blockers, ACEi angiotensin converting enzyme inhibitors, ARB/ACEi = use of either ARB or ACEi, eGFR= estimated glomerular filtration rate, ACR= urinary albumin-to-creatinine ratio.

Table 4: Hypertensive population: ages 65 years and older (part c)

| Country                                  | France          | Germany        |             | Poland         | Sweden      | UK          |
|------------------------------------------|-----------------|----------------|-------------|----------------|-------------|-------------|
|                                          | Study           |                |             |                |             |             |
| Characteristics                          | Three City      | ActiFE         | ESTHER      | PolSenior      | PIVUS       | MRC         |
| Age range                                | ages 65+        |                |             |                |             |             |
| N study pop                              | 6726            | 806            | 3 709       | 3 396          | 732         | 8 297       |
| Mean age, years (SD)                     | 74.8 (5.6)      | 76.2 (6.5)     | 70.1 (6.3)  | 76.0 (10.4)    | 70.1 (0.2)  | 81.2 (4.6)  |
| Females (%)                              | 62.9            | 42.6           | 53.1        | 50.9           | 51.9        | 64.0        |
| DM (%)                                   | 11.3            | 19.4           | 30.7        | 24.8           | 13.5        | 8.1         |
| Smokers (%)                              | 5.3             | 7.6            | 7.5         | 11.3           | 10.1        | 11.2        |
| mean Systolic Blood pressure, mmHg (SD)  | 153 (20)        | 145 (11)       | 142 (19)    | 151 (21)       | 159 (19)    | 162 (16)    |
| mean Diastolic Blood pressure, mmHg (SD) | 85 (11)         | 81 (11)        | 82 (10)     | 86 (11)        | 82 (9)      | 78 (12)     |
| Mean BMI (kg/m <sup>2</sup> ) (SD)       | 26.1 (4.1)      | 28.5 (4.2)     | 29.1 (4.9)  | 28.8 (5.0)     | 27.3 (4.4)  | 26.3 (4.2)  |
| ARB use (%)                              | 11.4            | 16.3           | 25.1        | 9.0            | 11.1        | n/a         |
| ACEi use (%)                             | 17.9            | 22.8           | 38.2        | 48.9           | 11.1        | n/a         |
| ACEi/ARB use (%)                         | n/a             | n/a            | n/a         | n/a            | n/a         | 9.2         |
| Mean eGFR by CKD-EPI (SD)                | 74.6 (13.6)     | 63.8 (15.6)    | 69.1 (14.6) | 70.6 (18.2)    | 75.0 (15.0) | 53.9 (14.2) |
| Mean eGFR by MDRD (SD)                   | 80.0 (17.0)     | 67.8 (16.3)    | 71.5 (15.5) | 76.7 (22.1)    | 80.1 (20.2) | 59.4 (47.2) |
| Median ACR mg/g (25p-75p)                | 5.8 (2.6-12.6)* | 6.5 (4.0-13.7) | n/a         | 4.9 (1.9-15.6) | n/a         | n/a         |

DM = diabetes mellitus, BMI= body mass index, ARB = angiotensin receptor blockers, ACEi angiotensin converting enzyme inhibitors, ARB/ACEi = use of either ARB or ACEi, eGFR= estimated glomerular filtration rate, ACR= urinary albumin-to-creatinine ratio.

Table 5: Obese population: ages 20 years and older (part a)

| Country                                  | Finland     | Germany        | Italy        |             | Netherlands   |               | Norway          | Portugal    | Spain          |
|------------------------------------------|-------------|----------------|--------------|-------------|---------------|---------------|-----------------|-------------|----------------|
|                                          | Study       |                |              |             |               |               |                 |             |                |
| Characteristics                          | FINRISK     | SHIP           | MATISS       | VIP         | LifeLines     | PREVEND       | HUNT            | PREVADIAB   | EPIRCE         |
| ages 20+                                 |             |                |              |             |               |               |                 |             |                |
| N study pop                              | 930         | 1 099          | 993          | 368         | 14 805        | 1 165         | 10 645          | 1 402       | 723            |
| Mean age, years (SD)                     | 53.3 (11.6) | 54.9 (14.3)    | 54.9 (11.7)  | 54.0 (12.6) | 46.9 (11.9)   | 52.7 (12.0)   | 54.6 (16.3)     | 50.7 (17.4) | 54.5 (14.6)    |
| Females (%)                              | 55.5        | 51.7           | 63.4         | 54.9        | 62.3          | 61.8          | 59.4            | 63.5        | 56.6           |
| DM (%)                                   | n/a         | 19.0           | 8.9          | 12.2        | 6.6           | n/a           | 7.4             | 13.5        | 19.1           |
| HT (%)                                   | n/a         | 72.8           | 29.2         | 44.6        | 29.5          | n/a           | 65.1            | 70.7        | 62.1           |
| Smokers (%)                              | n/a         | 21.9           | 15.9         | 19.3        | 17.0          | n/a           | 22.7            | n/a         | 18.7           |
| mean Systolic Blood pressure, mmHg (SD)  | 139 (19)    | 144 (21)       | 151 (23)     | 134 (20)    | 132 (15)      | 135 (19)      | 147 (23)        | 143 (26)    | 140 (21)       |
| mean Diastolic Blood pressure, mmHg (SD) | 83 (11)     | 87 (12)        | 92 (13)      | 80 (10)     | 77 (9)        | 76 (9)        | 85 (13)         | 90 (33)     | 84 (11)        |
| Mean BMI (kg/m <sup>2</sup> ) (SD)       | 34.2 (4.2)  | 33.5 (3.3)     | 33.4 (3.2)   | 34.3 (6.7)  | 33.6 (3.6)    | 33.3 (3.3)    | 33.1 (3.1)      | 33.9 (3.5)  | 34.2 (4.3)     |
| ARB use (%)                              | n/a         | 3.02           | n/a          | 1.4         | n/a           | n/a           | n/a             | n/a         | 10.1           |
| ACEi use (%)                             | n/a         | 23.28          | n/a          | 5.2         | n/a           | n/a           | n/a             | n/a         | 12.3           |
| ACEi/ARB use (%)                         | n/a         | n/a            | n/a          | n/a         | n/a           | n/a           | n/a             | n/a         | n/a            |
| Mean eGFR by CKD-EPI (SD)                | 88.1 (15.4) | 77.9 (17.1)    | 96.6 (14.5)  | 80.8 (16.2) | 95.3 (15.5)   | 80.5 (15.3)   | 92.2 (20.0)     | 81.3 (18.2) | 82.6 (17.9)    |
| Mean eGFR by MDRD (SD)                   | 86.7 (16.3) | 76.1 (15.4)    | 101.3 (20.6) | 78.5 (14.9) | 93.0 (17.7)   | 77.7 (13.8)   | 94.6 (24.0)     | 78.5 (16.0) | 81.3 (17.7)    |
| Median ACR mg/g (25p-75p)                | n/a         | 9.9 (5.6-23.4) | n/a          | n/a         | 2.5 (1.4-5.2) | 6.2 (4.4-9.9) | 11.8 (8.4-16.6) | n/a         | 5.1 (2.6-11.2) |

DM = diabetes mellitus, HT= hypertension, BMI= body mass index, ARB = angiotensin receptor blockers, ACEi angiotensin converting enzyme inhibitors, ARB/ACEi = use of either ARB or ACEi, eGFR= estimated glomerular filtration rate, ACR= urinary albumin-to-creatinine ratio.



Table 5: Obese population: ages 45 years and older (part b)

| Country                                  | France      | Ireland        | Italy               | Switzerland |
|------------------------------------------|-------------|----------------|---------------------|-------------|
| Study                                    |             |                |                     |             |
| Characteristics                          | MONALISA    | SLAN           | INCIPE              | Bus Santé   |
|                                          | ages 45 +   |                |                     |             |
| N study pop                              | 985         | 339            | 755                 | 639         |
| Mean age, years (SD)                     | 58.7 (10.5) | 59.6 (9.1)     | 61.1 (10.4)         | 60.1 (10.4) |
| Females (%)                              | 49.7        | 52.5           | n/a                 | 45.4        |
| DM (%)                                   | 14.0        | 12.1           | 14.4                | 11.0        |
| HT (%)                                   | 45.8        | 71.3           | 54.6                | 43.7        |
| Smokers (%)                              | 9.9         | 12.0           | 16.4                | 10.8        |
| mean Systolic Blood pressure, mmHg (SD)  | 145 (20)    | 145 (19)       | 146 (20)            | 134 (22)    |
| mean Diastolic Blood pressure, mmHg (SD) | 86 (10)     | 85 (11)        | 90 (11)             | 81 (11)     |
| Mean BMI (kg/m <sup>2</sup> ) (SD)       | 34.1 (4.0)  | 33.6 (3.2)     | 33.7 (7.0)          | 33.1 (3.1)  |
| ARB use (%)                              | 21.8        | n/a            | n/a                 | n/a         |
| ACEi use (%)                             | 11.8        | n/a            | n/a                 | n/a         |
| ACEi/ARB use (%)                         | n/a         | n/a            | n/a                 | n/a         |
| Mean eGFR by CKD-EPI (SD)                | 74.3 (14.1) | 79.4 (17.2)    | 83.1 (16.8)         | 87.4 (13.6) |
| Mean eGFR by MDRD (SD)                   | 73.4 (13.2) | 79.5 (18.1)    | 85.7 (20.9)         | 88.8 (15.4) |
| Median ACR mg/g (25p-75p)                | n/a         | 9.6 (5.1-18.1) | only for dipstick + | n/a         |

DM = diabetes mellitus, HT= hypertension, BMI= body mass index, ARB = angiotensin receptor blockers, ACEi angiotensin converting enzyme inhibitors, ARB/ACEi = use of either ARB or ACEi, eGFR= estimated glomerular filtration rate, ACR= urinary albumin-to-creatinine ratio.

Table 5: Obese population: ages 65 years and older (part c)

| Country                                  | France      | Germany        |             | Poland         | Sweden      | UK          |
|------------------------------------------|-------------|----------------|-------------|----------------|-------------|-------------|
|                                          | Study       |                |             |                |             |             |
| Characteristics                          | Three City  | ActiFE         | ESTHER      | PolSenior      | PIVUS       | MRC         |
| ages 65 +                                |             |                |             |                |             |             |
| N study pop                              | 1 141       | 361            | 1 480       | 1 461          | 290         | 2 991       |
| Mean age, years (SD)                     | 73.7 (5.0)  | 75.2 (6.3)     | 68.7 (6.2)  | 73.4 (9.7)     | 70.2 (0.2)  | 81.3 (4.8)  |
| Females (%)                              | n/a         | n/a            | n/a         | 57.8           | 52.1        | 67.5        |
| DM (%)                                   | 18.6        | 20.8           | 38.7        | 32.7           | 17.6        | 11.0        |
| HT (%)                                   | 88.9        | 70.1           | 91.2        | 80.3           | 79.3        | 65.6        |
| Smokers (%)                              | 4.1         | 9.1            | 6.3         | 9.0            | 10.0        | 9.8         |
| mean Systolic Blood pressure, mmHg (SD)  | 151 (22)    | 145 (11)       | 141 (18)    | 146 (21)       | 154 (23)    | 149 (22)    |
| mean Diastolic Blood pressure, mmHg (SD) | 85 (11)     | 81 (11)        | 82 (10)     | 86 (11)        | 80 (10)     | 76 (13)     |
| Mean BMI (kg/m <sup>2</sup> ) (SD)       | 32.9 (2.9)  | 33.2 (3.2)     | 33.9 (3.9)  | 33.9 (3.5)     | 33.2 (3.1)  | 32.8 (2.6)  |
| ARB use (%)                              | 14.1        | 14.5           | 27.8        | 9.7            | 10.0        | n/a         |
| ACEi use (%)                             | 20.0        | 20.2           | 38.0        | 47.5           | 12.1        | n/a         |
| ACEi/ARB use (%)                         | n/a         | n/a            | n/a         | n/a            | n/a         | 11.4        |
| Mean eGFR by CKD-EPI (SD)                | 75.4 (14.0) | 62.9 (14.6)    | 69.5 (15.4) | 72.8 (18.1)    | 74.0 (15.1) | 52.1 (14.0) |
| Mean eGFR by MDRD (SD)                   | 80.6 (17.5) | 66.4 (15.0)    | 71.5 (16.2) | 78.5 (22.7)    | 78.8 (19.8) | 56.5 (15.0) |
| Median ACR mg/g (25p-75p)                | n/a         | 6.3 (4.0-13.2) | n/a         | 4.3 (1.7-13.1) | n/a         | n/a         |

DM = diabetes mellitus, HT= hypertension, BMI= body mass index, ARB = angiotensin receptor blockers, ACEi angiotensin converting enzyme inhibitors, ARB/ACEi = use of either ARB or ACEi, eGFR= estimated glomerular filtration rate, ACR= urinary albumin-to-creatinine ratio.

Table 6: Non diabetic population: ages 20 years and older (part a)

| Country                                  | Finland         | Germany        | Italy        |             | Netherlands   |               | Norway          | Portugal    | Spain         |
|------------------------------------------|-----------------|----------------|--------------|-------------|---------------|---------------|-----------------|-------------|---------------|
| Study                                    | FINRISK         | SHIP           | MATISS       | VIP         | PREVEND       | LifeLines     | HUNT            | PREVADIAB   | EPIRCE        |
| Characteristics                          |                 |                |              |             |               |               |                 |             |               |
| <b>Age range</b>                         | <b>ages 20+</b> |                |              |             |               |               |                 |             |               |
| N study pop                              | 3 852           | 3 822          | 3 584        | 1 102       | 8 381         | 92 032        | 62 655          | 4 578       | 2 459         |
| Mean age, years (SD)                     | 49.1 (12.5)     | 48.0 (16.1)    | 48.7 (14.1)  | 48.7 (14.1) | 48.2(12.2)    | 44.0 (12.4)   | 50.0 (17.0)     | 45.1 (18.0) | 47.8 (16.0)   |
| Females (%)                              | 54.2            | 51.9           | 48.8         | 50.2        | 54.7          | 58.8          | 53.3            | 59.8        | 59.1          |
| HT (%)                                   | 42.2            | 48.5           | 14.5         | 33.3        | 26.7          | 17.8          | 42.5            | 51.2        | 37.4          |
| Smokers (%)                              | n/a             | 32.0           | 28.1         | 24.7        | n/a           | 18.9          | 29.6            | n/a         | 26.5          |
| mean Systolic Blood pressure, mmHg (SD)  | 131 (19)        | 134 (21)       | 139 (23)     | 128 (19)    | 126 (18)      | 125 (15)      | 137 (21)        | 134 (25)    | 130 (21)      |
| mean Diastolic Blood pressure, mmHg (SD) | 79 (11)         | 83 (11)        | 84 (13)      | 77 (10)     | 73 (9)        | 74 (9)        | 80 (12)         | 85 (34)     | 79 (11)       |
| Mean BMI (kg/m <sup>2</sup> ) (SD)       | 26.7 (4.7)      | 26.9 (4.6)     | 27.5 (4.4)   | 28.1 (6.0)  | 25.8 (4.0)    | 26.0 (4.3)    | 26.3 (4.0)      | 27.4 (4.9)  | 27.1 (5.1)    |
| ARB use (%)                              | n/a             | 1.3            | n/a          | 1.9         | n/a           | n/a           | n/a             | n/a         | 3.9           |
| ACEi use (%)                             | n/a             | 9.8            | n/a          | 3.4         | n/a           | n/a           | n/a             | n/a         | 5.0           |
| ACEi/ARB use (%)                         | n/a             | n/a            | n/a          | n/a         | n/a           | n/a           | n/a             | n/a         | n/a           |
| Mean eGFR by CKD-EPI (SD)                | 89.8 (14.7)     | 83.4 (16.0)    | 100.8 (14.6) | 84.3 (16.3) | 83.7 (14.8)   | 96.7 (14.9)   | 98.3 (19.1)     | 85.7 (17.7) | 87.5 (17.7)   |
| Mean eGFR by MDRD (SD)                   | 87.0 (15.1)     | 80.1 (14.7)    | 103.4 (19.2) | 81.0 (14.6) | 80.1 (13.7)   | 93.4 (17.0)   | 100.7 (24.0)    | 81.9 (15.9) | 84.6 (17.5)   |
| Median ACR mg/g (25p-75p)                | n/a             | 7.8 (4.9-15.1) | n/a          | n/a         | 5.4 (4.1-8.2) | 2.2 (1.3-4.1) | 10.9 (8.1-14.8) | n/a         | 4.5 (2.4-8.0) |

HT= hypertension, BMI= body mass index, ARB = angiotensin receptor blockers, ACEi angiotensin converting enzyme inhibitors, ARB/ACEi = use of either ARB or ACEi, eGFR= estimated glomerular filtration rate, ACR= urinary albumin-to-creatinine ratio.

Table 6: Non diabetic population: ages 45 years and older (part c)

| Country                                  | France          | Ireland        | Italy               | Switzerland |
|------------------------------------------|-----------------|----------------|---------------------|-------------|
| Study                                    | MONALISA        | SLAN           | INCIPE              | Bus Santé   |
| Characteristics                          |                 |                |                     |             |
| <b>Age range</b>                         | <b>ages 45+</b> |                |                     |             |
| N study pop                              | 4 517           | 1 071          | 3 583               | 4 548       |
| Mean age, years (SD)                     | 55.0 (11.2)     | 59.4 (9.8)     | 59.2 (11.4)         | 58.1 (10.9) |
| Females (%)                              | 50.4            | 57.6           | 53.0                | 49.8        |
| HT (%)                                   | 21.6            | 55.1           | 33.4                | 21.4        |
| Smokers (%)                              | 15.3            | 18.2           | 15.5                | 13.8        |
| mean Systolic Blood pressure, mmHg (SD)  | 134 (20)        | 140 (20)       | 137 (20)            | 126 (23)    |
| mean Diastolic Blood pressure, mmHg (SD) | 81 (11)         | 82 (13)        | 85 (10)             | 75 (11)     |
| Mean BMI (kg/m <sup>2</sup> ) (SD)       | 26.4 (4.7)      | 27.8 (4.5)     | 26.5 (5.1)          | 25.5 (4.1)  |
| ARB use (%)                              | 9.3             | n/a            | n/a                 | n/a         |
| ACEi use (%)                             | 5.2             | n/a            | n/a                 | n/a         |
| ACEi/ARB use (%)                         | n/a             | n/a            | n/a                 | n/a         |
| Mean eGFR by CKD-EPI (SD)                | 76.5 (12.9)     | 81.1 (16.5)    | 86.3 (16.2)         | 89.8 (13.3) |
| Mean eGFR by MDRD (SD)                   | 74.5 (11.8)     | 81.5 (18.2)    | 88.3 (20.4)         | 90.7 (15.8) |
| Median ACR mg/g (25p-75p)                | n/a             | 9.2 (4.3-17.7) | only for dipstick + | n/a         |

HT= hypertension, BMI= body mass index, ARB = angiotensin receptor blockers, ACEi angiotensin converting enzyme inhibitors, ARB/ACEi = use of either ARB or ACEi, eGFR= estimated glomerular filtration rate, ACR= urinary albumin-to-creatinine ratio.

Table 6: Non diabetic population: ages 65 years and older (part c)

| Country                                  | France          | Germany        |             | Poland         | Sweden      | UK          |
|------------------------------------------|-----------------|----------------|-------------|----------------|-------------|-------------|
| Study                                    |                 |                |             |                |             |             |
| Characteristics                          | Three City      | ActiFE         | ESTHER      | PolSenior      | PIVUS       | MRC         |
| Age range                                | ages 65+        |                |             |                |             |             |
| N study pop                              | 7 817           | 1 302          | 3 399       | 3 694          | 897         | 12 137      |
| Mean age, years (SD)                     | 74.3 (5.6)      | 75.5 (6.6)     | 69.2 (6.3)  | 75.9 (11.2)    | 70.2 (0.2)  | 81.2 (4.7)  |
| Females (%)                              | 65.6            | 44.9           | 56.6        | 48.3           | 51.2        | 61.9        |
| HT (%)                                   | 75.9            | 49.9           | 75.8        | 68.7           | 70.6        | 63.4        |
| Smokers (%)                              | 5.6             | 8.6            | 7.7         | 12.8           | 10.5        | 11.7        |
| mean Systolic Blood pressure, mmHg (SD)  | 146 (22)        | 142 (12)       | 139 (19)    | 143 (22)       | 149 (22)    | 148 (22)    |
| mean Diastolic Blood pressure, mmHg (SD) | 82 (11)         | 80 (11)        | 82 (9)      | 83 (11)        | 79 (10)     | 74 (13)     |
| Mean BMI (kg/m <sup>2</sup> ) (SD)       | 25.5 (4.0)      | 27.3 (4.0)     | 27.8 (4.3)  | 27.6 (4.8)     | 26.4 (4.2)  | 26.0 (4.1)  |
| ARB use (%)                              | 8.6             | 13.9           | 17.0        | 5.8            | 6.5         | n/a         |
| ACEi use (%)                             | 12.7            | 18.2           | 26.2        | 35.6           | 6.8         | n/a         |
| ACEi/ARB use (%)                         | n/a             | n/a            | n/a         | n/a            | n/a         | 8.4         |
| Mean eGFR by CKD-EPI (SD)                | 75.2 (13.1)     | 65.9 (14.5)    | 71.0 (13.5) | 72.4 (18.0)    | 75.7 (14.8) | 53.9 (14.2) |
| Mean eGFR by MDRD (SD)                   | 80.3 (16.2)     | 69.7 (15.2)    | 73.0 (14.3) | 79.1 (22.6)    | 81.3 (20.8) | 59.1 (40.1) |
| Median ACR mg/g (25p-75p)                | 4.9 (2.5-10.3)* | 5.8 (3.8-11.1) | n/a         | 4.4 (1.8-13.0) | n/a         | n/a         |

HT= hypertension, BMI= body mass index, ARB = angiotensin receptor blockers, ACEi angiotensin converting enzyme inhibitors, ARB/ACEi = use of either ARB or ACEi, eGFR= estimated glomerular filtration rate, ACR= urinary albumin-to-creatinine ratio.

Table 7: Non hypertensive population: ages 20 years and older (part a)

| Country                                  | Finland         | Germany        | Italy        |             | Netherlands   |               | Norway         | Portugal    | Spain         |
|------------------------------------------|-----------------|----------------|--------------|-------------|---------------|---------------|----------------|-------------|---------------|
| Study                                    | FINRISK         | SHIP           | MATISS       | VIP         | PREVEND       | LifeLines     | HUNT           | PREVADIAB   | EPIRCE        |
| Characteristics                          | FINRISK         | SHIP           | MATISS       | VIP         | PREVEND       | LifeLines     | HUNT           | PREVADIAB   | EPIRCE        |
| <b>Age range</b>                         | <b>ages 20+</b> |                |              |             |               |               |                |             |               |
| N study pop                              | 2 341           | 2 041          | 3 188        | 777         | 6 201         | 77 302        | 36 398         | 2 328       | 1 611         |
| Mean age, years (SD)                     | 45.1 (11.8)     | 42.0 (15.0)    | 46.9 (13.6)  | 46.4 (13.9) | 45.2 (10.9)   | 43.1 (12.0)   | 42.7 (14.4)    | 37.3 (14.4) | 42.2 (13.7)   |
| Females (%)                              | 60.1            | 62,0           | 45.5         | 51.0        | 57.1          | 62.3          | 56.8           | 61.7        | 63.6          |
| DM (%)                                   | 5.7             | 3.7            | 3.8          | 5.4         | 1.0           | 1.9           | 1.2            | 2.6         | 4.5           |
| Smokers (%)                              | n/a             | 38.3           | 30.4         | 27.4        | n/a           | 19.2          | 33.0           | n/a         | 31.8          |
| mean Systolic Blood pressure, mmHg (SD)  | 121 (11)        | 120 (11)       | 135 (20)     | 120 (12)    | 118 (11)      | 120 (10)      | 123 (10)       | 117 (12)    | 118 (12)      |
| mean Diastolic Blood pressure, mmHg (SD) | 74 (9)          | 76 (7)         | 83 (12)      | 74 (8)      | 70 (7)        | 71 (7)        | 74 (8)         | 75 (9)      | 73 (8)        |
| Mean BMI (kg/m <sup>2</sup> ) (SD)       | 25.7 (4.2)      | 25.4 (4.2)     | 27.1 (4.3)   | 27.6 (4.8)  | 25.0 (3.7)    | 25.7 (4.2)    | 25.4 (3.7)     | 26.1 (4.6)  | 26.0 (4.8)    |
| ARB use (%)                              | n/a             | 0.1            | n/a          | 0.0         | n/a           | n/a           | n/a            | n/a         | 0.0           |
| ACEi use (%)                             | n/a             | 2.2            | n/a          | 0.1         | n/a           | n/a           | n/a            | n/a         | 0.1           |
| ACEi/ARB use (%)                         | n/a             | n/a            | n/a          | n/a         | n/a           | n/a           | n/a            | n/a         | n/a           |
| Mean eGFR by CKD-EPI (SD)                | 92.4 (14.1)     | 87.2 (15.7)    | 102.4 (13.8) | 85.6 (15.9) | 86.1 (13.9)   | 97.6 (14.7)   | 104.7 (16.5)   | 91.1 (15.6) | 91.7 (15.9)   |
| Mean eGFR by MDRD (SD)                   | 88.4 (14.7)     | 82.3 (13.9)    | 104.9 (18.9) | 81.5 (13.9) | 81.7 (13.0)   | 94.0 (17.0)   | 106.0 (23.2)   | 85.6 (14.7) | 87.3 (16.4)   |
| Median ACR mg/g (25p-75p)                | n/a             | 6.7 (4.5-11.7) | n/a          | n/a         | 5.2 (4.0-7.4) | 2.1 (1.2-3.9) | 9.8 (7.7-12.7) | n/a         | 4.1 (2.3-6.9) |

DM = diabetes mellitus, BMI= body mass index, ARB = angiotensin receptor blockers, ACEi angiotensin converting enzyme inhibitors, ARB/ACEi = use of either ARB or ACEi, eGFR= estimated glomerular filtration rate, ACR= urinary albumin-to-creatinine ratio.

Table 7: Non hypertensive population: ages 45 years and older (part b)

| Country                                  | France          | Ireland        | Italy               | Switzerland |
|------------------------------------------|-----------------|----------------|---------------------|-------------|
| Study                                    | MONALISA        | SLAN           | INCIPE              | Bus Santé   |
| Characteristics                          |                 |                |                     |             |
| <b>Age range</b>                         | <b>ages 45+</b> |                |                     |             |
| N study pop                              | 3 650           | 497            | 2 481               | 3 654       |
| Mean age, years (SD)                     | 52.9 (10.8)     | 56.0 (8.8)     | 57.0 (11.0)         | 56.5 (10.5) |
| Females (%)                              | 50.1            | 68.4           | 53.4                | 51          |
| DM (%)                                   | 3.0             | 3.4            | 3.7                 | 2.2         |
| Smokers (%)                              | 17.4            | 21.9           | 17.1                | 14.8        |
| mean Systolic Blood pressure, mmHg (SD)  | 130 (18)        | 124 (10)       | 132 (18)            | 122 (22)    |
| mean Diastolic Blood pressure, mmHg (SD) | 80 (10)         | 76 (7)         | 83 (10)             | 74 (11)     |
| Mean BMI (kg/m <sup>2</sup> ) (SD)       | 25.8 (4.4)      | 26.7 (4.4)     | 25.8 (4.0)          | 25.0 (3.9)  |
| ARB use (%)                              | 0.3             | n/a            | n/a                 | n/a         |
| ACEi use (%)                             | 0.9             | n/a            | n/a                 | n/a         |
| ACEi/ARB use (%)                         | n/a             | n/a            | n/a                 | n/a         |
| Mean eGFR by CKD-EPI (SD)                | 78.2 (12.1)     | 84.8 (14.4)    | 89.1 (15.0)         | 91.5 (12.3) |
| Mean eGFR by MDRD (SD)                   | 75.7 (11.2)     | 84.1 (16.5)    | 90.7 (19.9)         | 92.0 (15.3) |
| Median ACR mg/g (25p-75p)                | n/a             | 7.3 (0.0-12.5) | only for dipstick + | n/a         |

DM = diabetes mellitus, BMI= body mass index, ARB = angiotensin receptor blockers, ACEi angiotensin converting enzyme inhibitors, ARB/ACEi = use of either ARB or ACEi, eGFR= estimated glomerular filtration rate, ACR= urinary albumin-to-creatinine ratio.

Table 7: Non hypertensive population: ages 65 years and older (part c)

| Country                                  | France          | Germany        |             | Poland         | Sweden      | UK          |
|------------------------------------------|-----------------|----------------|-------------|----------------|-------------|-------------|
| Study                                    | Three City      | ActiFE         | ESTHER      | PolSenior      | PIVUS       | MRC         |
| Characteristics                          |                 |                |             |                |             |             |
| <b>Age range</b>                         | <b>ages 65+</b> |                |             |                |             |             |
| N study pop                              | 1 974           | 700            | 923         | 1 373          | 284         | 4 760       |
| Mean age, years (SD)                     | 72.6 (5.1)      | 75.0 (6.7)     | 67.1 (6.0)  | 75.9 (12.3)    | 70.2 (0.2)  | 81.1 (4.7)  |
| Females (%)                              | 65.2            | 44.6           | 59.9        | 42.9           | 45.4        | 55.8        |
| DM (%)                                   | 4.2             | 6.9            | 10.8        | 15.0           | 7.0         | 7.6         |
| Smokers (%)                              | 6.6             | 11.2           | 10.4        | 14.8           | 11.7        | 12.0        |
| mean Systolic Blood pressure, mmHg (SD)  | 125 (11)        | 139 (13)       | 124 (10)    | 126 (12)       | 125 (10)    | 126 (11)    |
| mean Diastolic Blood pressure, mmHg (SD) | 74 (7)          | 79 (11)        | 77 (6)      | 77 (8)         | 71 (8)      | 67 (10)     |
| Mean BMI (kg/m <sup>2</sup> ) (SD)       | 24.3 (3.6)      | 26.5 (3.8)     | 26.1 (3.7)  | 26.5 (4.7)     | 25.2 (3.9)  | 25.7 (4.1)  |
| ARB use (%)                              | 0.0             | 10.0           | 0.0         | 1.5            | 1.1         | n/a         |
| ACEi use (%)                             | 1.3             | 7.6            | 0.0         | 14.1           | 1.8         | n/a         |
| ACEi/ARB use (%)                         | n/a             | n/a            | n/a         | n/a            | n/a         | 8.9         |
| Mean eGFR by CKD-EPI (SD)                | 78.0 (11.4)     | 67.1 (13.7)    | 74.8 (11.7) | 74.5 (18.5)    | 76.9 (14.4) | 53.9 (14.4) |
| Mean eGFR by MDRD (SD)                   | 82.7 (15.2)     | 70.9 (14.5)    | 76.3 (13.1) | 82.4 (24.2)    | 83.3 (21.6) | 58.5 (16.2) |
| Median ACR mg/g (25p-75p)                | 4.7 (2.5-8.7)*  | 5.5 (3.8-10.3) | n/a         | 4.3 (1.7-13.4) | n/a         | n/a         |

DM = diabetes mellitus, BMI= body mass index, ARB = angiotensin receptor blockers, ACEi angiotensin converting enzyme inhibitors, ARB/ACEi = use of either ARB or ACEi, eGFR= estimated glomerular filtration rate, ACR= urinary albumin-to-creatinine ratio.



Table 8: Non obese population: ages 20 years and older (part a)

| Country                                  | Finland     | Germany        | Italy       |             | Netherlands   |               | Norway          | Portugal    | Spain         |
|------------------------------------------|-------------|----------------|-------------|-------------|---------------|---------------|-----------------|-------------|---------------|
| Study                                    | FINRISK     | SHIP           | MATISS      | VIP         | LifeLines     | PREVEND       | HUNT            | PREVADIAB   | EPIRCE        |
| Characteristics                          | ages 20+    |                |             |             |               |               |                 |             |               |
| <b>Age range</b>                         | ages 20+    |                |             |             |               |               |                 |             |               |
| N study pop                              | 3 298       | 3 199          | 2 777       | 817         | 79 641        | 7 268         | 53 816          | 3 504       | 2 012         |
| Mean age, years (SD)                     | 48.6 (12.6) | 48.1 (16.7)    | 47.1 (14.3) | 47.7 (14.4) | 44.2 (12.6)   | 47.8 (12.2)   | 49.1 (17.1)     | 44.6 (18.3) | 47.4 (16.4)   |
| Females (%)                              | 54.0        | 50.6           | 43.5        | 47.7        | 58.0          | 53.3          | 51.8            | 58.8        | 58.6          |
| DM (%)                                   | n/a         | 8.2            | 3.7         | 5.3         | 1.6           | n/a           | 2.5             | 5.1         | 7.1           |
| HT (%)                                   | n/a         | 45.4           | 10.8        | 30.4        | 16.1          | n/a           | 39.3            | 46.8        | 33.6          |
| Smokers (%)                              | n/a         | 33.2           | 31.7        | 26.3        | 19.2          | n/a           | 30.7            | n/a         | 27.7          |
| mean Systolic Blood pressure, mmHg (SD)  | 130 (18)    | 133 (21)       | 136         | 127 (19)    | 124 (15)      | 125 (18)      | 136 (21)        | 143 (25)    | 143 (21)      |
| mean Diastolic Blood pressure, mmHg (SD) | 78 (11)     | 82 (11)        | 82          | 78 (10)     | 73 (9)        | 72 (9)        | 79 (12)         | 83 (34)     | 77 (11)       |
| Mean BMI (kg/m <sup>2</sup> ) (SD)       | 25.0 (2.8)  | 25.1 (2.9)     | 25.6        | 25.7 (3.0)  | 24.7 (2.7)    | 24.7 (2.7)    | 25.0(2.7)       | 25.1 (2.9)  | 25.1 (2.9)    |
| ARB use (%)                              | n/a         | 1.3            | n/a         | 2.1         | n/a           | n/a           | n/a             | n/a         | 3.1           |
| ACEi use (%)                             | n/a         | 9.2            | n/a         | 2.7         | n/a           | n/a           | n/a             | n/a         | 4.3           |
| ACEi/ARB use (%)                         | n/a         | n/a            | n/a         | n/a         | n/a           | n/a           | n/a             | n/a         | n/a           |
| Mean eGFR by CKD-EPI (SD)                | 89.9 (14.7) | 83.7 (16.6)    | 101.8       | 85.0 (16.1) | 96.8 (14.8)   | 84.2 (14.8)   | 99.0 (18.8)     | 86.2 (17.9) | 88.0 (17.8)   |
| Mean eGFR by MDRD (SD)                   | 87.0 (15.1) | 80.5 (14.8)    | 104.1       | 81.4 (14.3) | 93.4 (16.3)   | 80.5 (13.7)   | 101.4 (23.5)    | 82.5 (16.1) | 85.1 (17.6)   |
| Median ACR mg/g (25p-75p)                | n/a         | 7.9 (5.0-15.6) | n/a         | n/a         | 2.1 (1.3-4.0) | 5.4 (4.1-8.2) | 10.8 (8.1-14.7) | n/a         | 4.4 (2.4-7.7) |

DM = diabetes mellitus, HT= hypertension, BMI= body mass index, ARB = angiotensin receptor blockers, ACEi angiotensin converting enzyme inhibitors, ARB/ACEi = use of either ARB or ACEi, eGFR= estimated glomerular filtration rate, ACR= urinary albumin-to-creatinine ratio.

Table 8: Non obese population: ages 45 years and older (part b)

| Country                                  | France          | Ireland        | Italy              | Switzerland |
|------------------------------------------|-----------------|----------------|--------------------|-------------|
| Study                                    | MONALISA        | SLAN           | INCIPE             | Bus Santé   |
| Characteristics                          |                 |                |                    |             |
| <b>Age range</b>                         | <b>ages 45+</b> |                |                    |             |
| N study pop                              | 3 775           | 821            | 3 104              | 4 109       |
| Mean age, years (SD)                     | 54.6 (11.3)     | 59.7 (10.2)    | 59.4 (11.6)        | 58.1 (11.0) |
| Females (%)                              | 49.7            | 57.5           | n/a                | 49.4        |
| DM (%)                                   | 3.3             | 5.9            | 5.7                | 3.2         |
| HT (%)                                   | 17.8            | 51.2           | 31.3               | 19.8        |
| Smokers (%)                              | 16.3            | 21             | 15.1               | 14.0        |
| mean Systolic Blood pressure, mmHg (SD)  | 132 (20)        | 138 (20)       | 136 (19)           | n/a         |
| mean Diastolic Blood pressure, mmHg (SD) | 80 (11)         | 81 (14)        | 84 (10)            | n/a         |
| Mean BMI (kg/m <sup>2</sup> ) (SD)       | 24.7 (2.9)      | 25.7 (3.0)     | 25 (3.0)           | 25.1 (2.9)  |
| ARB use (%)                              | 7.6             | n/a            | n/a                | n/a         |
| ACEi use (%)                             | 4.7             | n/a            | n/a                | n/a         |
| ACEi/ARB use (%)                         | n/a             | n/a            | n/a                | n/a         |
| Mean eGFR by CKD-EPI (SD)                | 76.7 (12.7)     | 81.3 (17.0)    | 86.3 (16.0)        | 89.9(13.3)  |
| Mean eGFR by MDRD (SD)                   | 74.7 (11.6)     | 81.7 (18.4)    | 88.3 (20.3)        | 90.8 (15.9) |
| Median ACR mg/g (25p-75p)                | n/a             | 9.2 (0.0-18.0) | only in dipstick + | n/a         |

DM = diabetes mellitus, HT= hypertension, BMI= body mass index, ARB = angiotensin receptor blockers, ACEi angiotensin converting enzyme inhibitors, ARB/ACEi = use of either ARB or ACEi, eGFR= estimated glomerular filtration rate, ACR= urinary albumin-to-creatinine ratio.

Table 8: Non obese population: ages 65 years and older (part c)

| Country                                  | France           | Germany        |             | Poland         | Sweden      | UK          |
|------------------------------------------|------------------|----------------|-------------|----------------|-------------|-------------|
| Study                                    |                  |                |             |                |             |             |
| Characteristics                          | Three City       | ActiFE         | ESTHER      | PolSenior      | PIVUS       | MRC         |
| <b>Age range</b>                         | <b>ages 65 +</b> |                |             |                |             |             |
| N study pop                              | 7 491            | 1 130          | 3 058       | 3 089          | 726         | 10 188      |
| Mean age, years (SD)                     | 74.3 (5.5)       | 75.8 (6.7)     | 69.9 (6.3)  | 76.6 (11.2)    | 70.1 (0.2)  | 81.1 (4.6)  |
| Females (%)                              | n/a              | n/a            | n/a         | 43.5           | 49.3        | 59.3        |
| DM (%)                                   | 8.2              | 10.9           | 20.5        | 16.6           | 9.4         | 7.0         |
| HT (%)                                   | 75.5             | 48.1           | 74.7        | 67.2           | 69.2        | 63.0        |
| Smokers (%)                              | 5.8              | 9.3            | 9.0         | 14.2           | 10.8        | 12.0        |
| mean Systolic Blood pressure, mmHg (SD)  | 146 (22)         | 142 (12)       | 138 (19)    | 143 (22)       | 143 (23)    | 148 (22)    |
| mean Diastolic Blood pressure, mmHg (SD) | 82 (11)          | 80 (11)        | 81 (9)      | 82 (11)        | 78 (10)     | 74 (13)     |
| Mean BMI (kg/m <sup>2</sup> ) (SD)       | 24.6 (2.9)       | 25.8 (2.5)     | 25.9 (2.6)  | 25.4 (3.0)     | 25.1 (3.0)  | 25.1 (3.0)  |
| ARB use (%)                              | 8.1              | 14.9           | 16.4        | 5.8            | 7.6         | n/a         |
| ACEi use (%)                             | 13.2             | 18.4           | 27.1        | 34.9           | 7.0         | n/a         |
| ACEi/ARB use (%)                         | n/a              | n/a            | n/a         | n/a            | n/a         | 8.7         |
| Mean eGFR by CKD-EPI (SD)                | 75.4 (13.0)      | 66.2 (14.8)    | 70.7 (13.5) | 71.6 (18.4)    | 76.1(14.7)  | 54.3(14.3)  |
| Mean eGFR by MDRD (SD)                   | 80.6 (16.4)      | 70.3 (15.6)    | 72.9 (14.4) | 78.3 (22.4)    | 81.9 (20.9) | 59.8 (43.3) |
| Median ACR mg/g (25p-75p)                | n/a              | 5.9 (3.9-11.3) | n/a         | 4.7 (1.8-14.4) | n/a         | n/a         |

DM = diabetes mellitus, HT= hypertension, BMI= body mass index, ARB = angiotensin receptor blockers, ACEi angiotensin converting enzyme inhibitors, ARB/ACEi = use of either ARB or ACEi, eGFR= estimated glomerular filtration rate, ACR= urinary albumin-to-creatinine ratio.

## Appendix 2: Methods on study selection

### Search strategy

To identify European studies with data on CKD prevalence in the general population, we performed a literature search in the PUBMED database. The following words were used for this search: "Renal Insufficiency, Chronic"[Mesh] OR kidney (or renal) insufficienc\*[tiab] OR kidney (or renal) dysfunction\*[tiab] OR kidney (or renal) impairment[tiab] OR impaired kidney (or renal) function[tiab] OR decreased kidney (or renal) function[tiab] OR chronic (or renal) kidney[tiab] OR CKD[tiab] AND Prevalence"[Mesh] OR "Incidence"[Mesh] OR "Follow-Up Studies"[Mesh] OR prevalen\*[tiab] OR inciden\*[tiab] OR progression[tiab] AND population\* OR community\* OR survey\* OR screening\* AND Glomerular filtration rate[tiab] OR \*GFR[tiab] OR creatinin\*[tiab] OR "Creatinine"[Mesh] OR proteinuria [Mesh] OR proteinuria[tiab] OR albuminuria[tiab] OR dipstick OR MDRD OR (Modification [tiab] AND diet [tiab] AND 'renal disease'[tiab]) OR ('Cockroft Gault' AND (equation OR formula)).

### In and exclusion criteria

Studies were included if designed to select a representative sample of the adult general population in a European country or region, if CKD prevalence could be calculated by serum creatinine-based equations, and if the sample size was more than 100 participants. Review articles were excluded. No language restrictions were applied. We identified all potentially relevant publications after January 2000 and before March 2013. Studies that ended recruitment prior to 1996 were excluded.

### Procedure

The systematic literature search was done by KB and VS. Any study that was judged relevant on the basis of its title was retrieved in abstract form, and if relevant, in full-text form. We extended our search by reviewing references from retrieved articles and review articles. Additionally, the representatives of national kidney foundations, renal registries and expert nephrologists in 39 European countries were asked to provide contact details for any relevant *unpublished* studies. Vacillation about eligibility was resolved by discussion between KB, VS and KJ. In case of unremitting doubt, we discussed possibilities for collaboration with the study representative. Eligible studies were invited to participate in an online questionnaire, assessing general study information (e.g. period of participant inclusion), and collected data. Finally, studies that agreed to contribute data were sent a syntax to collect data.

Table 1: Collected data by participating studies, part a

| Country                   | Finland | France    | Germany    | Ireland | Italy  |      |        |        |        |     |
|---------------------------|---------|-----------|------------|---------|--------|------|--------|--------|--------|-----|
| Study                     | FINRISK | MONA LISA | Three City | ActiFE  | ESTHER | SHIP | SLAN07 | INCIPE | MATISS | VIP |
| Age                       | yes     | yes       | yes        | yes     | yes    | yes  | yes    | yes    | yes    | yes |
| Gender                    | yes     | yes       | yes        | yes     | yes    | yes  | yes    | yes    | yes    | yes |
| BMI / weight and height   | yes     | yes       | yes        | yes     | yes    | yes  | yes    | yes    | yes    | yes |
| Ethnicity                 | yes     | *         | *          | yes     | no     | yes  | yes    | yes    |        | yes |
| Hypertensive status       | yes     | yes       | yes        | yes     | yes    | yes  | yes    | yes    | yes    | yes |
| Diabetic status           | yes     | yes       | yes        | yes     | yes    | yes  | yes    | yes    | yes    | yes |
| - Specified for DM type 1 | yes     | yes       |            |         |        | yes  |        |        | yes    |     |
| - Specified for DM type 2 | yes     | yes       |            |         |        | yes  |        |        | yes    | yes |
| Other co-morbidity        | yes     | yes       | yes        | yes     | yes    | yes  | yes    | yes    | yes    | yes |
| Smoking status            | yes     | yes       | yes        | yes     | yes    | yes  | yes    | yes    | yes    | yes |
| Statin use                | yes     | yes       | yes        | yes     | yes    | yes  | yes    | yes    | yes    | yes |
| NSAID use                 |         | yes       | yes        | yes     | yes    | yes  |        | yes    | yes    |     |
| ACEi use                  |         | yes       | yes        | yes     | yes    | yes  |        |        | yes    | yes |
| ARB use                   |         | yes       | yes        | yes     | yes    | yes  |        |        | yes    | yes |
| Allopurinol               |         | yes       | yes        | yes     | yes    | yes  |        |        | yes    | yes |
| Systolic blood pressure   | yes     | yes       | yes        | yes     | yes    | yes  | yes    | yes    | yes    | yes |
| Diastolic blood pressure  | yes     | yes       | yes        | yes     | yes    | yes  | yes    | yes    | yes    | yes |
| Cystatin C                |         |           | yes        | yes     | yes    | yes  |        | yes    |        |     |
| Serum calcium             |         |           | yes        | yes     |        | yes  |        | yes    |        |     |
| Serum phosphate           |         |           | yes        | yes     |        |      |        | yes    |        |     |
| Serum bicarbonate         |         |           |            |         |        |      |        |        |        |     |
| Serum albumin             |         |           |            | yes     | yes    | yes  | yes    | yes    |        |     |
| Hemoglobin                |         | yes       | yes        | yes     | yes    | yes  | yes    |        | yes    | yes |
| Lipids                    | yes     | yes       | yes        | yes     | yes    | yes  | yes    | yes    | yes    | yes |
| CRP                       |         | yes       | yes        | yes     | yes    | yes  |        | yes    |        | yes |

\*National legislation prohibiting collection of ethnicity data.

Table 1: Collected data by participating studies, part b

| Country \ Study           | Netherlands |         | Norway           | Poland    | Portugal  | Spain  | Sweden | Switzerland | UK  |
|---------------------------|-------------|---------|------------------|-----------|-----------|--------|--------|-------------|-----|
|                           | LifeLines   | PREVEND | HUNT             | PolSenior | PREVADIAB | EPIRCE | PIVUS  | Bus Santé   | MRC |
| Age                       | yes         | yes     | yes              | yes       | yes       | yes    | yes    | yes         | yes |
| Gender                    | yes         | yes     | yes              | yes       | yes       | yes    | yes    | yes         | yes |
| BMI / weight and height   | yes         | yes     | yes              | yes       | yes       | yes    | yes    | yes         | yes |
| Ethnicity                 | yes         | yes     | yes              | yes       | no        | yes    | yes    |             |     |
| Hypertensive status       | yes         | yes     | yes              | yes       | yes       | yes    | yes    | yes         | yes |
| Diabetic status           | yes         | yes     | yes              | yes       | yes       | yes    | yes    | yes         | yes |
| - Specified for DM type 1 | yes         |         |                  |           | yes       | yes    |        |             |     |
| - Specified for DM type 2 | yes         | yes     |                  |           | yes       | yes    |        |             |     |
| Other co-morbidity        | yes         | yes     | yes              | yes       | yes       | yes    | yes    | yes         | yes |
| Smoking status            | yes         | yes     | yes              | yes       | yes       | yes    | yes    | yes         | yes |
| Statin use                | yes         |         |                  | yes       | yes       |        | yes    | yes         | yes |
| NSAID use                 | yes         | yes     |                  | yes       |           | yes    | yes    |             | yes |
| ACEi use                  | yes         | yes     |                  | yes       | yes       |        | yes    |             | yes |
| ARB use                   | yes         | yes     |                  | yes       | yes       |        | yes    |             | yes |
| Allopurinol               | yes         | yes     |                  | yes       |           |        | yes    |             |     |
| Systolic blood pressure   | yes         | yes     | yes              | yes       | yes       | yes    | yes    | yes         | yes |
| Diastolic blood pressure  | yes         | yes     | yes              | yes       | yes       | yes    | yes    | yes         | yes |
| Cystatin C                | yes         | yes     |                  | yes       |           |        | yes    |             |     |
| Serum calcium             | yes         | yes     |                  | yes       |           | yes    | yes    | yes         | yes |
| Serum phosphate           | yes         | yes     |                  | yes       |           |        | yes    |             | yes |
| Serum bicarbonate         |             |         |                  |           |           |        |        |             |     |
| Serum albumin             | yes         | yes     |                  | yes       |           | yes    | yes    |             | yes |
| Hemoglobin                | yes         |         | yes <sup>1</sup> | yes       |           | yes    | yes    |             | yes |
| Lipids                    | yes         | yes     | yes              | yes       | yes       | yes    | yes    | yes         |     |
| CRP                       |             | yes     |                  | yes       |           |        | yes    |             |     |

<sup>1</sup>In sub study including all females.

Table 2: Answers to questions on regional/national health care system characteristics, part 1.

| <b>Country</b>                                                                                     | <b>Finland</b>    | <b>France</b>     | <b>Germany</b> | <b>Ireland</b>    | <b>Italy</b>      | <b>Netherlands</b>            |
|----------------------------------------------------------------------------------------------------|-------------------|-------------------|----------------|-------------------|-------------------|-------------------------------|
| <b>Answers</b>                                                                                     |                   |                   |                |                   |                   |                               |
| <b>Access to nephrologist</b>                                                                      | gatekeeper system | gatekeeper system | both           | gatekeeper system | gatekeeper system | gatekeeper system             |
| <b>Health insurance coverage</b>                                                                   | 100%              | 100%              | 100%           | 51%               | 100%              | 95-99%                        |
| <b>Are there guidelines for the referral of CKD patients from primary care to specialist care?</b> |                   |                   |                |                   |                   |                               |
| N/A                                                                                                |                   |                   |                |                   |                   |                               |
| No guideline on referral criteria                                                                  | x                 |                   |                |                   |                   |                               |
| No guideline, Yes referral criteria                                                                |                   |                   |                |                   |                   |                               |
| Yes there is a guideline on referral criteria                                                      |                   | x                 |                | x                 | x since 2012      | x                             |
| other                                                                                              |                   |                   | x              |                   |                   |                               |
| <b>QI activities for the care of CKD stage 1-5 (NOT on RRT)</b>                                    |                   |                   |                |                   |                   |                               |
| Public campaign/program on prevention, detection and/or treatment of CKD by:                       |                   |                   |                |                   |                   |                               |
| -Governmental organisation/ Ministry of Health                                                     |                   |                   |                |                   |                   |                               |
| -Society of Nephrology, Kidney Foundation or other renal organisation                              | x                 | x                 |                |                   | x                 | x                             |
| Quality requirements for CKD care (e.g. measurable outcome testing)                                |                   |                   |                |                   |                   | x                             |
| Guideline committee                                                                                | x                 |                   |                | x                 |                   | x                             |
| Laboratory-based reporting of eGFR calculated from serum creatinine                                | x                 | x                 | x              | x                 |                   | x                             |
| Population screening program encouraging at risk individuals to test kidney function               |                   |                   | x              |                   |                   |                               |
| Payment for performance                                                                            |                   |                   |                |                   |                   |                               |
| <b>Reward for complying with QI or CKD guideline?</b>                                              | none              | none              |                | none              | none              | none                          |
| <b>Negative consequence for NOT complying?</b>                                                     | none              | none              | none           | none              | none              | disqualified if non-compliant |

Table 2: Answers to questions on regional/national health care system characteristics, part 2.

| Country                                                                                            | Norway            | Poland            | Portugal          | Spain       | Sweden            | Switzerland | UK                  |
|----------------------------------------------------------------------------------------------------|-------------------|-------------------|-------------------|-------------|-------------------|-------------|---------------------|
| <b>Answers</b>                                                                                     |                   |                   |                   |             |                   |             |                     |
| <b>Access to nephrologist</b>                                                                      | gatekeeper system | gatekeeper system | gatekeeper system | open access | gatekeeper system | open access | gatekeeper system   |
| <b>Health insurance coverage</b>                                                                   | 100%              | 100%              | 100%              | 100%        | 100%              | 100%        | 100% <sup>1</sup>   |
| <b>Are there guidelines for the referral of CKD patients from primary care to specialist care?</b> |                   |                   |                   |             |                   |             |                     |
| N/A                                                                                                |                   |                   |                   |             |                   |             |                     |
| No guideline on referral criteria                                                                  |                   |                   | x                 |             | x                 |             |                     |
| No guideline, Yes referral criteria                                                                |                   |                   |                   |             |                   |             |                     |
| Yes there is a guideline on referral criteria                                                      | x                 | x                 |                   | x           |                   |             | x                   |
| other                                                                                              |                   |                   |                   |             |                   | x           |                     |
| <b>QI activities for the care of CKD stage 1-5 (NOT on RRT)</b>                                    |                   |                   |                   |             |                   |             |                     |
| Public campaign/program on prevention, detection and/or treatment of CKD by:                       |                   |                   |                   |             |                   |             |                     |
| -Governmental organisation/ Ministry of Health                                                     |                   |                   |                   |             |                   |             | x                   |
| -Society of Nephrology, Kidney Foundation or other renal organisation                              | x                 | x                 | x                 | x           |                   |             | x                   |
| Quality requirements for CKD care (e.g. measurable outcome testing)                                |                   |                   |                   |             |                   |             | x                   |
| Guideline committee                                                                                |                   |                   |                   | x           |                   |             |                     |
| Laboratory-based reporting of eGFR calculated from serum creatinine                                | x                 | x                 |                   |             | x                 | x           | x                   |
| Population screening program encouraging at risk individuals to test kidney function               | x                 |                   |                   |             |                   |             | x                   |
| Payment for performance                                                                            |                   |                   |                   |             |                   |             | x                   |
| <b>Reward for complying with QI or CKD guideline?</b>                                              | none              | none              | n/a               | none        | none              | none        | Monetary Reputation |
| <b>Negative consequence for NOT complying?</b>                                                     | none              | none              | n/a               | none        | none              | none        | Monetary Reputation |

<sup>1</sup> All, except migrants who've been in the country <1yr
